# Supplementary material for: Genome Plasticity and Polymorphisms in Critical Genes Correlate with Increased Virulence of Dutch Outbreak-Related Coxiella burnetii Strains
Source: Front Microbiol. 2017 Aug 10;8:1526. doi: 10.3389/fmicb.2017.01526 (PMC5554327; doi:10.3389/fmicb.2017.01526)
Supplement: Supplementary file 1 [file Table1.XLSX]

## Sheet: Supplementary Table_1
Supplementary table 1: List of orthologs in sequenced C. burnetii strains along with proteins that are ortholog with reference NM as assessed by proteinortho software.
The non-orthologs with reference NM are represented as “-”. These genes include point mutations and small insertion/ deletion of <50 bp in existing pseudo genes of NM (pseudo genes are not included in the otholog analysis). Annotation of pseudo genes of NM and COG categories of orthologs are mentioned in the table.
S.No	18430	42785537	701CbB1	CbCVIC1	601	602	Henzerling	Heizberg	Scurry_Q217	NL3262	2574	Schperling	NLhu3345937	NM	Gene_Name	COG	Remarks
1	AYN00_00125	AYM00_02065	AYM94_00130	AYM02_02020	AYM90_00135	AYM11_01945	AYO24_10125	AYO23_10115	AYM17_01405	AUR58_02340	AYM93_00120	AYO29_00945	AYM38_01985	-	FAD-binding protein	0	Pseudo gene, CBU_0027a
2	AYN00_00415	AYM00_01005	AYM94_00410	AYM02_00985	AYM90_00420	AYM11_00965	AYO24_00770	AYO23_00775	AYM17_09495	AUR58_01275	AYM93_00405	AYO29_09730	AYM38_00970	-	protein TolA	0	Pseudo gene, CBU_0088a
3	AYN00_00705	AYM00_00710	AYM94_00700	AYM02_00690	AYM90_00710	AYM11_00675	AYO24_01060	AYO23_01065	AYM17_09210	AUR58_00980	AYM93_00695	AYO29_09445	AYM38_00675	-	hypothetical protein	0	Pseudo gene, CBU_0143
4	AYN00_00860	AYM00_00555	AYM94_00855	AYM02_00535	AYM90_00865	AYM11_00520	AYO24_01215	AYO23_01220	AYM17_09020	AUR58_00825	AYM93_00850	AYO29_02705	AYM38_00520	-	hypothetical protein	0	Pseudo gene, CBU_0174
5	AYN00_01050	AYM00_00345	AYM94_01045	AYM02_00335	AYM90_01055	AYM11_00320	AYO24_01405	AYO23_01410	AYM17_08830	AUR58_00620	AYM93_01040	AYO29_02900	AYM38_00325	-	hypothetical protein	0	Pseudo gene, CBU_0211
6	AYN00_01610	AYM00_10850	AYM94_01605	AYM02_10480	AYM90_01620	AYM11_10140	AYO24_01965	AYO23_01970	AYM17_08270	AUR58_11380	AYM93_01600	AYO29_03635	AYM38_10320	-	hypothetical protein	0	Pseudo gene, CBU_0319a
7	AYN00_01615	AYM00_10845	AYM94_01610	AYM02_10475	AYM90_01625	AYM11_10135	AYO24_01970	AYO23_01975	AYM17_08255	AUR58_11375	AYM93_01605	AYO29_03640	AYM38_10315	-	hypothetical protein	0	Pseudo gene, CBU_0319a
8	AYN00_01645	AYM00_10805	AYM94_01640	AYM02_10440	AYM90_01655	AYM11_10105	AYO24_02000	AYO23_02005	AYM17_08225	AUR58_11335	AYM93_01635	AYO29_03670	AYM38_10280	-	hypothetical protein	0	Pseudo gene, CBU_0327
9	AYN00_01790	AYM00_05120	AYM94_01785	AYM02_04890	AYM90_01800	AYM11_04715	AYO24_02140	AYO23_02150	AYM17_08065	AUR58_05480	AYM93_01780	AYO29_03080	AYM38_04825	-	hypothetical protein	0	Pseudo gene, CBU_0360
10	AYN00_01805	AYM00_05135	AYM94_01800	AYM02_04905	AYM90_01815	AYM11_04730	AYO24_02155	AYO23_02165	AYM17_08055	AUR58_05495	AYM93_01795	AYO29_03090	AYM38_04840	-	peptidase	0	Pseudo gene, CBU_0362a
11	AYN00_01940	AYM00_05270	AYM94_01935	AYM02_05045	AYM90_01955	AYM11_04870	AYO24_02285	AYO23_02290	AYM17_07925	AUR58_05635	AYM93_01930	AYO29_08160	AYM38_04975	-	hypothetical protein	0	Pseudo gene, CBU_0388
12	AYN00_02010	AYM00_05335	AYM94_02000	AYM02_05115	AYM90_02025	AYM11_04940	AYO24_02355	AYO23_02360	AYM17_07860	AUR58_05705	AYM93_01995	AYO29_08100	AYM38_05045	-	aminoglycoside phosphotransferase	0	Pseudo gene, CBU_0404
13	AYN00_02120	AYM00_05440	AYM94_02110	AYM02_05220	AYM90_02135	AYM11_05045	AYO24_02455	AYO23_02460	AYM17_07755	AUR58_05820	AYM93_02105	AYO29_07985	AYM38_05155	-	peptide chain release factor 2	0	Pseudo gene, CBU_0428a
14	AYN00_03235	AYM00_06745	AYM94_03230	AYM02_06455	AYM90_03250	AYM11_06245	AYO24_03570	AYO23_03580	AYM17_06615	AUR58_07155	AYM93_03220	AYO29_07820	AYM38_06390	-	hypothetical protein	0	Pseudo gene, CBU_0652
15	AYN00_03530	AYM00_07040	AYM94_03530	AYM02_06745	AYM90_03545	AYM11_06530	AYO24_03865	AYO23_03875	AYM17_06325	AUR58_07450	AYM93_03520	AYO29_07525	AYM38_06650	-	hypothetical protein	0	Pseudo gene, CBU_0707a
16	AYN00_03785	AYM00_07260	AYM94_03785	AYM02_06960	AYM90_03800	AYM11_06740	AYO24_05615	AYO23_05630	AYM17_06075	AUR58_07695	AYM93_03775	AYO29_01895	AYM38_06860	-	hypothetical protein	0	Pseudo gene, CBU_0758a
17	AYN00_03790	AYM00_07265	AYM94_03790	AYM02_06965	AYM90_03805	AYM11_06745	AYO24_05610	AYO23_05625	AYM17_06070	AUR58_07700	AYM93_03780	AYO29_01900	AYM38_06865	-	hypothetical protein	0	Pseudo gene, CBU_0758a
18	AYN00_04285	AYM00_07765	AYM94_04285	AYM02_07460	AYM90_04300	AYM11_07240	AYO24_05110	AYO23_05125	AYM17_05565	AUR58_08205	AYM93_04275	AYO29_02410	AYM38_07360	-	hypothetical protein	0	Pseudo gene, CBU_0854a
19	AYN00_04500	AYM00_07965	AYM94_04500	AYM02_07660	AYM90_04515	AYM11_07440	AYO24_04895	AYO23_04910	AYM17_05350	AUR58_08405	AYM93_04490	AYO29_02605	AYM38_07560	-	hypothetical protein	0	Pseudo gene, CBU_0899
20	AYN00_04815	AYM00_08290	AYM94_04815	AYM02_07980	AYM90_04835	AYM11_07755	AYO24_04580	AYO23_04595	AYM17_05055	AUR58_08730	AYM93_04805	AYO29_04380	AYM38_07880	-	hypothetical protein	0	Pseudo gene, CBU_0956a
21	AYN00_04950	AYM00_08430	AYM94_04950	AYM02_08120	AYM90_04970	AYM11_07890	AYO24_04445	AYO23_04460	AYM17_04915	AUR58_08870	AYM93_04940	AYO29_04240	AYM38_08020	-	prephenate dehydratase	0	Pseudo gene, CBU_0982a
22	AYN00_05150	AYM00_08645	AYM94_05150	AYM02_08325	AYM90_05170	AYM11_08095	AYO24_04250	AYO23_04265	AYM17_04710	AUR58_09080	AYM93_05140	AYO29_04055	AYM38_08220	-	hypothetical protein	0	Pseudo gene, CBU_1024
23	AYN00_05165	AYM00_08670	AYM94_05165	AYM02_08350	AYM90_05185	AYM11_08120	AYO24_04235	AYO23_04250	AYM17_04695	AUR58_09110	AYM93_05155	AYO29_04040	AYM38_08245	-	non-ribosomal peptide synthetase module-containing protein	0	Pseudo gene, CBU_1028a
24	AYN00_05170	AYM00_08675	AYM94_05170	AYM02_08355	AYM90_05190	AYM11_08125	AYO24_04230	AYO23_04245	AYM17_04690	AUR58_09115	AYM93_05160	AYO29_04035	AYM38_08250	-	hypothetical protein	0	Pseudo gene, CBU_1028a
25	AYN00_05335	AYM00_07255	AYM94_05340	AYM02_06950	AYM90_05355	AYM11_06735	AYO24_04065	AYO23_04080	AYM17_04505	AUR58_07680	AYM93_05330	AYO29_04635	AYM38_06855	-	hypothetical protein	0	Pseudo gene, CBU_1061a
26	AYN00_05970	AYM00_09290	AYM94_05990	AYM02_08930	AYM90_05990	AYM11_08670	AYO24_06050	AYO23_06065	AYM17_04150	AUR58_09745	AYM93_05985	AYO29_05075	AYM38_08820	-	hypothetical protein	0	Pseudo gene, CBU_1140
27	AYN00_06020	AYM00_09350	AYM94_06040	AYM02_08985	AYM90_06040	AYM11_08720	AYO24_06100	AYO23_06115	AYM17_04105	AUR58_09805	AYM93_06035	AYO29_05125	AYM38_08875	-	hypothetical protein	0	Pseudo gene, CBU_1150
28	AYN00_06510	AYM00_03590	AYM94_06385	AYM02_03485	AYM90_06530	AYM11_03355	AYO24_08725	AYO23_08725	AYM17_01590	AUR58_03885	AYM93_06380	AYO29_01570	AYM38_03445	-	hypothetical protein	0	Pseudo gene, CBU_1686a
29	AYN00_06810	AYM00_05935	AYM94_06830	AYM02_05705	AYM90_06830	AYM11_05520	AYO24_06805	AYO23_06820	AYM17_03380	AUR58_06335	AYM93_06825	AYO29_05845	AYM38_05635	-	hypothetical protein	0	Pseudo gene, CBU_1298
30	AYN00_07800	AYM00_04625	AYM94_07820	AYM02_04440	AYM90_07820	AYM11_04280	AYO24_07815	AYO23_07825	AYM17_02405	AUR58_04960	AYM93_07815	AYO29_08415	AYM38_04385	-	hypothetical protein	0	Pseudo gene, CBU_1495
31	AYN00_07945	AYM00_04460	AYM94_07965	AYM02_04290	AYM90_07960	AYM11_04140	AYO24_07955	AYO23_07965	AYM17_02615	AUR58_04800	AYM93_07960	AYO29_04920	AYM38_04235	-	hypothetical protein	0	Pseudo gene, CBU_1525
32	AYN00_07955	AYM00_04450	AYM94_07975	AYM02_04280	AYM90_07970	AYM11_04130	AYO24_07965	AYO23_07975	AYM17_02255	AUR58_04790	AYM93_07970	AYO29_08565	AYM38_04225	-	hypothetical protein	0	Pseudo gene, CBU_1527
33	AYN00_08105	AYM00_04255	AYM94_08125	AYM02_04105	AYM90_08125	AYM11_03960	AYO24_08125	AYO23_08130	AYM17_02095	AUR58_04585	AYM93_08120	AYO29_08730	AYM38_04060	-	hypothetical protein	0	Pseudo gene, CBU_1562
34	AYN00_08280	AYM00_04055	AYM94_08305	AYM02_03920	AYM90_08300	AYM11_03785	AYO24_08300	AYO23_08305	AYM17_01940	AUR58_04370	AYM93_08300	AYO29_08910	AYM38_03880	-	hypothetical protein	0	Pseudo gene, CBU_1598
35	AYN00_08320	AYM00_04010	AYM94_08345	AYM02_03880	AYM90_08340	AYM11_03745	AYO24_08340	AYO23_08345	AYM17_01900	AUR58_04320	AYM93_08340	AYO29_08955	AYM38_03835	-	hypothetical protein	0	Pseudo gene, CBU_1608
36	AYN00_08610	AYM00_03340	AYM94_08645	AYM02_03245	AYM90_08630	AYM11_03130	AYO24_08945	AYO23_08945	AYM17_00515	AUR58_03630	AYM93_08640	AYO29_01335	AYM38_03205	-	hypothetical protein	0	Pseudo gene, CBU_1730a
37	AYN00_09705	AYM00_01620	AYM94_10140	AYM02_01595	AYM90_10125	AYM11_01545	AYO24_00195	AYO23_00195	AYM17_10055	AUR58_01890	AYM93_09720	AYO29_10170	AYM38_01570	-	hypothetical protein	0	Pseudo gene, CBU_2038a
38	AYN00_09830	AYM00_01745	AYM94_10265	AYM02_01720	AYM90_10250	AYM11_01670	AYO24_00070	AYO23_00070	AYM17_10175	AUR58_02015	AYM93_09845	AYO29_10280	AYM38_01695	-	permease	0	Pseudo gene, CBU_20675a
43	AYN00_00025	AYM00_01965	AYM94_00030	AYM02_01920	AYM90_00035	AYM11_01845	AYO24_10225	AYO23_10215	AYM17_01305	AUR58_02240	AYM93_00020	AYO29_00845	AYM38_01885	CBU_0008	hypothetical protein	0	orthologs
46	AYN00_00045	AYM00_01985	AYM94_00050	AYM02_01940	AYM90_00055	AYM11_01865	AYO24_10205	AYO23_10195	AYM17_01325	AUR58_02260	AYM93_00040	AYO29_00865	AYM38_01905	CBU_0011	hypothetical protein	0	orthologs
50	AYN00_00080	AYM00_02020	AYM94_00085	AYM02_01975	AYM90_00090	AYM11_01900	AYO24_10170	AYO23_10160	AYM17_01360	AUR58_02295	AYM93_00075	AYO29_00900	AYM38_01940	CBU_0019	hypothetical protein	0	orthologs
51	AYN00_00090	AYM00_02030	AYM94_00095	AYM02_01985	AYM90_00100	AYM11_01910	AYO24_10160	AYO23_10150	AYM17_01370	AUR58_02305	AYM93_00085	AYO29_00910	AYM38_01950	CBU_0021	hypothetical protein	0	orthologs
52	AYN00_00095	AYM00_02035	AYM94_00100	AYM02_01990	AYM90_00105	AYM11_01915	AYO24_10155	AYO23_10145	AYM17_01375	AUR58_02310	AYM93_00090	AYO29_00915	AYM38_01955	CBU_0022	hypothetical protein	0	orthologs
53	AYN00_00100	AYM00_02040	AYM94_00105	AYM02_01995	AYM90_00110	AYM11_01920	AYO24_10150	AYO23_10140	AYM17_01380	AUR58_02315	AYM93_00095	AYO29_00920	AYM38_01960	CBU_0023	hypothetical protein	0	orthologs
55	AYN00_00110	AYM00_02050	AYM94_00115	AYM02_02005	AYM90_00120	AYM11_01930	AYO24_10140	AYO23_10130	AYM17_01390	AUR58_02325	AYM93_00105	AYO29_00930	AYM38_01970	CBU_0025	hypothetical protein	0	orthologs
60	AYN00_00150	AYM00_02090	AYM94_00155	AYM02_02045	AYM90_00160	AYM11_01970	AYO24_10095	AYO23_10085	AYM17_01430	AUR58_02365	AYM93_00145	AYO29_00970	AYM38_02010	CBU_0033	4'-phosphopantetheinyl transferase	0	orthologs
61	AYN00_00155	AYM00_02095	AYM94_00160	AYM02_02050	AYM90_00165	AYM11_01975	AYO24_10090	AYO23_10080	AYM17_01435	AUR58_02370	AYM93_00150	AYO29_00975	AYM38_02015	CBU_0034	acyl carrier protein	0	orthologs
72	AYN00_00240	AYM00_01170	AYM94_00240	AYM02_01155	AYM90_00245	AYM11_01125	AYO24_00655	AYO23_00660	AYM17_09655	AUR58_01440	AYM93_00235	AYO29_09180	AYM38_01135	CBU_0049	hypothetical protein	0	orthologs
73	AYN00_00245	AYM00_01165	AYM94_00245	AYM02_01150	AYM90_00250	AYM11_01120	AYO24_00650	AYO23_00655	AYM17_09650	AUR58_01435	AYM93_00240	AYO29_09185	AYM38_01130	CBU_0050	hypothetical protein	0	orthologs
74	AYN00_00250	AYM00_01160	AYM94_00250	AYM02_01145	AYM90_00255	AYM11_01115	AYO24_00645	AYO23_00650	AYM17_09645	AUR58_01430	AYM93_00245	AYO29_09190	AYM38_01125	CBU_0051	hypothetical protein	0	orthologs
79	AYN00_00275	AYM00_01135	AYM94_00275	AYM02_01120	AYM90_00280	AYM11_01090	AYO24_00620	AYO23_00625	AYM17_09620	AUR58_01405	AYM93_00270	AYO29_09215	AYM38_01100	CBU_0057	hypothetical protein	0	orthologs
83	AYN00_00310	AYM00_01100	AYM94_00310	AYM02_01085	AYM90_00315	AYM11_01055	AYO24_00585	AYO23_00590	AYM17_09585	AUR58_01370	AYM93_00305	AYO29_09245	AYM38_01065	CBU_0065a	hypothetical protein	0	orthologs
86	AYN00_00330	AYM00_01080	AYM94_00330	AYM02_01065	AYM90_00335	AYM11_01035	AYO24_00565	AYO23_00570	AYM17_09565	AUR58_01355	AYM93_00325	AYO29_09265	AYM38_01045	CBU_0068	hypothetical protein	0	orthologs
90	AYN00_00370	AYM00_01045	AYM94_00370	AYM02_01025	AYM90_00375	AYM11_01005	AYO24_00730	AYO23_00735	AYM17_09535	AUR58_01315	AYM93_00365	AYO29_09770	AYM38_01010	CBU_0077	hypothetical protein	0	orthologs
93	AYN00_00400	AYM00_01020	AYM94_00395	AYM02_01000	AYM90_00405	AYM11_00980	AYO24_00755	AYO23_00760	AYM17_09510	AUR58_01290	AYM93_00390	AYO29_09745	AYM38_00985	CBU_0085	entericidin	0	orthologs
96	AYN00_00420	AYM00_01000	AYM94_00415	AYM02_00980	AYM90_00425	AYM11_00960	AYO24_00775	AYO23_00780	AYM17_09490	AUR58_01270	AYM93_00410	AYO29_09725	AYM38_00965	CBU_0089	hypothetical protein	0	orthologs
97	AYN00_00425	AYM00_00995	AYM94_00420	AYM02_00975	AYM90_00430	AYM11_00955	AYO24_00780	AYO23_00785	AYM17_09485	AUR58_01265	AYM93_00415	AYO29_09720	AYM38_00960	CBU_0089a	hypothetical protein	0	orthologs
104	AYN00_00465	AYM00_00955	AYM94_00460	AYM02_00935	AYM90_00470	AYM11_00915	AYO24_00820	AYO23_00825	AYM17_09445	AUR58_01225	AYM93_00455	AYO29_09680	AYM38_00920	CBU_0095a	acetyltransferase	0	orthologs
108	AYN00_00480	AYM00_00940	AYM94_00475	AYM02_00920	AYM90_00485	AYM11_00900	AYO24_00835	AYO23_00840	AYM17_09430	AUR58_01210	AYM93_00470	AYO29_09665	AYM38_00905	CBU_0098a	hypothetical protein	0	orthologs
109	AYN00_00495	AYM00_00925	AYM94_00490	AYM02_00905	AYM90_00500	AYM11_00885	AYO24_00850	AYO23_00855	AYM17_09415	AUR58_01195	AYM93_00485	AYO29_09650	AYM38_00890	CBU_0098b	hypothetical protein	0	orthologs
111	AYN00_00505	AYM00_00915	AYM94_00500	AYM02_00895	AYM90_00510	AYM11_00875	AYO24_00860	AYO23_00865	AYM17_09405	AUR58_01185	AYM93_00495	AYO29_09640	AYM38_00880	CBU_0100	hypothetical protein	0	orthologs
113	AYN00_00515	AYM00_00905	AYM94_00510	AYM02_00885	AYM90_00520	AYM11_00865	AYO24_00870	AYO23_00875	AYM17_09395	AUR58_01175	AYM93_00505	AYO29_09630	AYM38_00870	CBU_0102	hypothetical protein	0	orthologs
114	AYN00_00530	AYM00_00885	AYM94_00525	AYM02_00865	AYM90_00535	AYM11_00850	AYO24_00885	AYO23_00890	AYM17_09380	AUR58_01150	AYM93_00520	AYO29_09615	AYM38_00850	CBU_0106	hypothetical protein	0	orthologs
120	AYN00_00570	AYM00_00845	AYM94_00565	AYM02_00825	AYM90_00575	AYM11_00810	AYO24_00925	AYO23_00930	AYM17_09340	AUR58_01115	AYM93_00560	AYO29_09575	AYM38_00810	CBU_0113	hypothetical protein	0	orthologs
125	AYN00_00605	AYM00_00810	AYM94_00600	AYM02_00790	AYM90_00610	AYM11_00775	AYO24_00960	AYO23_00965	AYM17_09305	AUR58_01080	AYM93_00595	AYO29_09540	AYM38_00775	CBU_0121	hypothetical protein	0	orthologs
126	AYN00_00610	AYM00_00805	AYM94_00605	AYM02_00785	AYM90_00615	AYM11_00770	AYO24_00965	AYO23_00970	AYM17_09300	AUR58_01075	AYM93_00600	AYO29_09535	AYM38_00770	CBU_0122	hypothetical protein	0	orthologs
130	AYN00_00630	AYM00_00785	AYM94_00625	AYM02_00765	AYM90_00635	AYM11_00750	AYO24_00985	AYO23_00990	AYM17_09280	AUR58_01055	AYM93_00620	AYO29_09515	AYM38_00750	CBU_0127	hypothetical protein	0	orthologs
141	AYN00_00725	AYM00_00690	AYM94_00720	AYM02_00670	AYM90_00730	AYM11_00655	AYO24_01080	AYO23_01085	AYM17_09185	AUR58_00960	AYM93_00715	AYO29_09425	AYM38_00655	CBU_0146	hypothetical protein	0	orthologs
144	AYN00_00740	AYM00_00675	AYM94_00735	AYM02_00655	AYM90_00745	AYM11_00640	AYO24_01095	AYO23_01100	AYM17_09170	AUR58_00945	AYM93_00730	AYO29_09410	AYM38_00640	CBU_0149	hypothetical protein	0	orthologs
151	AYN00_00785	AYM00_00630	AYM94_00780	AYM02_00610	AYM90_00790	AYM11_00595	AYO24_01140	AYO23_01145	AYM17_09125	AUR58_00900	AYM93_00775	AYO29_09365	AYM38_00595	CBU_0156a	integrase	0	orthologs
152	AYN00_00790	AYM00_00625	AYM94_00785	AYM02_00605	AYM90_00795	AYM11_00590	AYO24_01145	AYO23_01150	AYM17_09120	AUR58_00895	AYM93_00780	AYO29_09360	AYM38_00590	CBU_0157	hypothetical protein	0	orthologs
153	AYN00_00795	AYM00_00620	AYM94_00790	AYM02_00600	AYM90_00800	AYM11_00585	AYO24_01150	AYO23_01155	AYM17_09115	AUR58_00890	AYM93_00785	AYO29_09355	AYM38_00585	CBU_0158	type I-F CRISPR-associated endoribonuclease Cas6/Csy4	0	orthologs
154	AYN00_00800	AYM00_00615	AYM94_00795	AYM02_00595	AYM90_00805	AYM11_00580	AYO24_01155	AYO23_01160	AYM17_09110	AUR58_00885	AYM93_00790	AYO29_09350	AYM38_00580	CBU_0159	type I-F CRISPR-associated protein Csy3	0	orthologs
155	AYN00_00825	AYM00_00590	AYM94_00820	AYM02_00570	AYM90_00830	AYM11_00555	AYO24_01180	AYO23_01185	AYM17_09085	AUR58_00860	AYM93_00815	AYO29_09325	AYM38_00555	CBU_0165	hypothetical protein	0	orthologs
156	AYN00_00855	AYM00_00560	AYM94_00850	AYM02_00540	AYM90_00860	AYM11_00525	AYO24_01210	AYO23_01215	AYM17_09025	AUR58_00830	AYM93_00845	AYO29_02700	AYM38_00525	CBU_0173	hypothetical protein	0	orthologs
157	AYN00_00865	AYM00_00550	AYM94_00860	AYM02_00530	AYM90_00870	AYM11_00515	AYO24_01220	AYO23_01225	AYM17_09015	AUR58_00820	AYM93_00855	AYO29_02710	AYM38_00515	CBU_0175	serine/threonine protein kinase	0	orthologs
164	AYN00_00900	AYM00_00515	AYM94_00895	AYM02_00495	AYM90_00905	AYM11_00480	AYO24_01255	AYO23_01260	AYM17_08980	AUR58_00785	AYM93_00890	AYO29_02745	AYM38_00480	CBU_0181a	hypothetical protein	0	orthologs
165	AYN00_00965	AYM00_00445	AYM94_00960	AYM02_00425	AYM90_00970	AYM11_00405	AYO24_01320	AYO23_01325	AYM17_08915	AUR58_00715	AYM93_00955	AYO29_02810	AYM38_00410	CBU_0193	hypothetical protein	0	orthologs
167	AYN00_00975	AYM00_00435	AYM94_00970	AYM02_00415	AYM90_00980	AYM11_00395	AYO24_01330	AYO23_01335	AYM17_08905	AUR58_00705	AYM93_00965	AYO29_02820	AYM38_00400	CBU_0195	MFS transporter	0	orthologs
168	AYN00_00985	AYM00_00425	AYM94_00980	AYM02_00405	AYM90_00990	AYM11_00385	AYO24_01340	AYO23_01345	AYM17_08895	AUR58_00695	AYM93_00975	AYO29_02830	AYM38_00390	CBU_0197	hypothetical protein	0	orthologs
171	AYN00_01005	AYM00_00390	AYM94_01000	AYM02_00380	AYM90_01010	AYM11_00365	AYO24_01360	AYO23_01365	AYM17_08875	AUR58_00665	AYM93_00995	AYO29_02850	AYM38_00370	CBU_0201	hypothetical protein	0	orthologs
173	AYN00_01020	AYM00_00375	AYM94_01015	AYM02_00365	AYM90_01025	AYM11_00350	AYO24_01375	AYO23_01380	AYM17_08860	AUR58_00650	AYM93_01010	AYO29_02865	AYM38_00355	CBU_0206	hypothetical protein	0	orthologs
174	AYN00_01030	AYM00_00365	AYM94_01025	AYM02_00355	AYM90_01035	AYM11_00340	AYO24_01385	AYO23_01390	AYM17_08850	AUR58_00640	AYM93_01020	AYO29_02875	AYM38_00345	CBU_0207	hypothetical protein	0	orthologs
175	AYN00_01045	AYM00_00350	AYM94_01040	AYM02_00340	AYM90_01050	AYM11_00325	AYO24_01400	AYO23_01405	AYM17_08835	AUR58_00625	AYM93_01035	AYO29_02895	AYM38_00330	CBU_0210	hypothetical protein	0	orthologs
176	AYN00_01055	AYM00_00340	AYM94_01050	AYM02_00330	AYM90_01060	AYM11_00315	AYO24_01410	AYO23_01415	AYM17_08825	AUR58_00615	AYM93_01045	AYO29_02905	AYM38_00320	CBU_0213	hypothetical protein	0	orthologs
178	AYN00_01090	AYM00_00305	AYM94_01085	AYM02_00295	AYM90_01095	AYM11_00280	AYO24_01445	AYO23_01450	AYM17_08790	AUR58_00565	AYM93_01080	AYO29_02940	AYM38_00285	CBU_0220	hypothetical protein	0	orthologs
186	AYN00_01155	AYM00_00245	AYM94_01150	AYM02_00235	AYM90_01160	AYM11_00220	AYO24_01510	AYO23_01515	AYM17_08725	AUR58_00500	AYM93_01145	AYO29_03000	AYM38_00225	CBU_0230	hypothetical protein	0	orthologs
215	AYN00_01295	AYM00_00095	AYM94_01290	AYM02_00090	AYM90_01305	AYM11_00075	AYO24_01650	AYO23_01655	AYM17_08580	AUR58_00345	AYM93_01285	AYO29_03325	AYM38_00080	CBU_0259	hypothetical protein	0	orthologs
225	AYN00_01360	AYM00_00030	AYM94_01355	AYM02_00025	AYM90_01370	AYM11_00010	AYO24_01715	AYO23_01720	AYM17_08520	AUR58_00280	AYM93_01350	AYO29_03385	AYM38_00015	CBU_0273	hypothetical protein	0	orthologs
228	AYN00_01380	AYM00_11080	AYM94_01375	AYM02_10710	AYM90_01390	AYM11_10370	AYO24_01735	AYO23_01740	AYM17_08500	AUR58_11605	AYM93_01370	AYO29_03405	AYM38_10550	CBU_0276	pyridine nucleotide-disulfide oxidoreductase	0	orthologs
229	AYN00_01385	AYM00_11075	AYM94_01380	AYM02_10705	AYM90_01395	AYM11_10365	AYO24_01740	AYO23_01745	AYM17_08495	AUR58_00245	AYM93_01375	AYO29_03410	AYM38_10545	CBU_0277	hypothetical protein	0	orthologs
233	AYN00_01420	AYM00_11040	AYM94_01415	AYM02_10670	AYM90_01430	AYM11_10330	AYO24_01775	AYO23_01780	AYM17_08460	AUR58_11570	AYM93_01410	AYO29_03445	AYM38_10510	CBU_0284	hypothetical protein	0	orthologs
234	AYN00_01425	AYM00_11035	AYM94_01420	AYM02_10665	AYM90_01435	AYM11_10325	AYO24_01780	AYO23_01785	AYM17_08455	AUR58_11565	AYM93_01415	AYO29_03450	AYM38_10505	CBU_0285	hypothetical protein	0	orthologs
238	AYN00_01450	AYM00_11010	AYM94_01445	AYM02_10640	AYM90_01460	AYM11_10300	AYO24_01805	AYO23_01810	AYM17_08430	AUR58_11540	AYM93_01440	AYO29_03475	AYM38_10480	CBU_0289	ferredoxin	0	orthologs
239	AYN00_01455	AYM00_11005	AYM94_01450	AYM02_10635	AYM90_01465	AYM11_10295	AYO24_01810	AYO23_01815	AYM17_08425	AUR58_11535	AYM93_01445	AYO29_03480	AYM38_10475	CBU_0290	50S ribosomal protein L33	0	orthologs
253	AYN00_01535	AYM00_10925	AYM94_01530	AYM02_10555	AYM90_01545	AYM11_10215	AYO24_01890	AYO23_01895	AYM17_08345	AUR58_11455	AYM93_01525	AYO29_03565	AYM38_10395	CBU_0306	hypothetical protein	0	orthologs
254	AYN00_01540	AYM00_10920	AYM94_01535	AYM02_10550	AYM90_01550	AYM11_10210	AYO24_01895	AYO23_01900	AYM17_08340	AUR58_11450	AYM93_01530	AYO29_03570	AYM38_10390	CBU_0307	hypothetical protein	0	orthologs
256	AYN00_01555	AYM00_10905	AYM94_01550	AYM02_10535	AYM90_01565	AYM11_10195	AYO24_01910	AYO23_01915	AYM17_08325	AUR58_11435	AYM93_01545	AYO29_03585	AYM38_10375	CBU_0311	hypothetical protein	0	orthologs
258	AYN00_01570	AYM00_10890	AYM94_01565	AYM02_10520	AYM90_01580	AYM11_10180	AYO24_01925	AYO23_01930	AYM17_08310	AUR58_11420	AYM93_01560	AYO29_03600	AYM38_10360	CBU_0313	lytic transglycosylase	0	orthologs
262	AYN00_01600	AYM00_10860	AYM94_01595	AYM02_10490	AYM90_01610	AYM11_10150	AYO24_01955	AYO23_01960	AYM17_08280	AUR58_11390	AYM93_01590	AYO29_03625	AYM38_10330	CBU_0318	hypothetical protein	0	orthologs
263	AYN00_01605	AYM00_10855	AYM94_01600	AYM02_10485	AYM90_01615	AYM11_10145	AYO24_01960	AYO23_01965	AYM17_08275	AUR58_11385	AYM93_01595	AYO29_03630	AYM38_10325	CBU_0319	hypothetical protein	0	orthologs
273	AYN00_01685	AYM00_10765	AYM94_01680	AYM02_10400	AYM90_01695	AYM11_10065	AYO24_02035	AYO23_02040	AYM17_08175	AUR58_11295	AYM93_01675	AYO29_03705	AYM38_10240	CBU_0335	acid phosphatase	0	orthologs
283	AYN00_01780	AYM00_05110	AYM94_01775	AYM02_04880	AYM90_01790	AYM11_04705	AYO24_02130	AYO23_02135	AYM17_08075	AUR58_05470	AYM93_01770	AYO29_03075	AYM38_04815	CBU_0357	hypothetical protein	0	orthologs
288	AYN00_01830	AYM00_05160	AYM94_01825	AYM02_04930	AYM90_01845	AYM11_04760	AYO24_02180	AYO23_02190	AYM17_08030	AUR58_05520	AYM93_01820	AYO29_03115	AYM38_04865	CBU_0370	hypothetical protein	0	orthologs
289	AYN00_01865	AYM00_05195	AYM94_01860	AYM02_04965	AYM90_01880	AYM11_04795	AYO24_02215	AYO23_02225	AYM17_08000	AUR58_05555	AYM93_01855	AYO29_03165	AYM38_04900	CBU_0377	hypothetical protein	0	orthologs
290	AYN00_01870	AYM00_05200	AYM94_01865	AYM02_04970	AYM90_01885	AYM11_04800	AYO24_02220	AYO23_02230	AYM17_07995	AUR58_05560	AYM93_01860	AYO29_03170	AYM38_04905	CBU_0378	hypothetical protein	0	orthologs
292	AYN00_01880	AYM00_05210	AYM94_01875	AYM02_04980	AYM90_01895	AYM11_04810	AYO24_02230	AYO23_02240	AYM17_07985	AUR58_05570	AYM93_01870	AYO29_03180	AYM38_04915	CBU_0380	hypothetical protein	0	orthologs
304	AYN00_02000	AYM00_05325	AYM94_01990	AYM02_05105	AYM90_02015	AYM11_04930	AYO24_02345	AYO23_02350	AYM17_07870	AUR58_05695	AYM93_01985	AYO29_08110	AYM38_05035	CBU_0402	acetyltransferase	0	orthologs
305	AYN00_02005	AYM00_05330	AYM94_01995	AYM02_05110	AYM90_02020	AYM11_04935	AYO24_02350	AYO23_02355	AYM17_07865	AUR58_05700	AYM93_01990	AYO29_08105	AYM38_05040	CBU_0403	acetyltransferase	0	orthologs
306	AYN00_02020	AYM00_05345	AYM94_02010	AYM02_05125	AYM90_02035	AYM11_04950	AYO24_02365	AYO23_02370	AYM17_07850	AUR58_05715	AYM93_02005	AYO29_08095	AYM38_05055	CBU_0407	hypothetical protein	0	orthologs
307	AYN00_02030	AYM00_05355	AYM94_02020	AYM02_05135	AYM90_02045	AYM11_04960	AYO24_02375	AYO23_02380	AYM17_07840	AUR58_05725	AYM93_02015	AYO29_08085	AYM38_05065	CBU_0409	hypothetical protein	0	orthologs
317	AYN00_02145	AYM00_05465	AYM94_02135	AYM02_05245	AYM90_02160	AYM11_05070	AYO24_02480	AYO23_02485	AYM17_07730	AUR58_05845	AYM93_02130	AYO29_07080	AYM38_05180	CBU_0433	mechanosensitive ion channel protein MscS	0	orthologs
318	AYN00_02150	AYM00_05470	AYM94_02140	AYM02_05250	AYM90_02165	AYM11_05075	AYO24_02485	AYO23_02490	AYM17_07725	AUR58_05850	AYM93_02135	AYO29_07075	AYM38_05185	CBU_0434a	hypothetical protein	0	orthologs
319	AYN00_02180	AYM00_05500	AYM94_02170	AYM02_05280	AYM90_02195	AYM11_05105	AYO24_02515	AYO23_02520	AYM17_07695	AUR58_05880	AYM93_02165	AYO29_07045	AYM38_05215	CBU_0440	hypothetical protein	0	orthologs
325	AYN00_02210	AYM00_05535	AYM94_02200	AYM02_05310	AYM90_02225	AYM11_05135	AYO24_02545	AYO23_02550	AYM17_07665	AUR58_05920	AYM93_02195	AYO29_07015	AYM38_05250	CBU_0446	hypothetical protein	0	orthologs
326	AYN00_02215	AYM00_10430	AYM94_02205	AYM02_10055	AYM90_02230	AYM11_09750	AYO24_02550	AYO23_02555	AYM17_07660	AUR58_10935	AYM93_02200	AYO29_07010	AYM38_09920	CBU_0447	hypothetical protein	0	orthologs
327	AYN00_02220	AYM00_10425	AYM94_02210	AYM02_10050	AYM90_02235	AYM11_09745	AYO24_02555	AYO23_02560	AYM17_07655	AUR58_10930	AYM93_02205	AYO29_07005	AYM38_09915	CBU_0448	hypothetical protein	0	orthologs
333	AYN00_02255	AYM00_10390	AYM94_02245	AYM02_10015	AYM90_02270	AYM11_09710	AYO24_02590	AYO23_02595	AYM17_07620	AUR58_10895	AYM93_02240	AYO29_06970	AYM38_09880	CBU_0455	thioredoxin	0	orthologs
334	AYN00_02260	AYM00_10385	AYM94_02250	AYM02_10010	AYM90_02275	AYM11_09705	AYO24_02595	AYO23_02600	AYM17_07615	AUR58_10890	AYM93_02245	AYO29_06965	AYM38_09875	CBU_0456	nucleoid-structuring protein H-NS	0	orthologs
340	AYN00_02300	AYM00_10345	AYM94_02290	AYM02_09970	AYM90_02315	AYM11_09665	AYO24_02635	AYO23_02640	AYM17_07575	AUR58_10850	AYM93_02285	AYO29_06925	AYM38_09835	CBU_0465	hypothetical protein	0	orthologs
343	AYN00_02315	AYM00_10330	AYM94_02305	AYM02_09955	AYM90_02330	AYM11_09650	AYO24_02650	AYO23_02655	AYM17_07560	AUR58_10835	AYM93_02300	AYO29_06910	AYM38_09820	CBU_0469	hypothetical protein	0	orthologs
346	AYN00_02345	AYM00_10300	AYM94_02335	AYM02_09925	AYM90_02360	AYM11_09620	AYO24_02680	AYO23_02685	AYM17_07535	AUR58_10805	AYM93_02330	AYO29_06880	AYM38_09790	CBU_0474	hypothetical protein	0	orthologs
347	AYN00_02355	AYM00_10290	AYM94_02345	AYM02_09915	AYM90_02370	AYM11_09610	AYO24_02690	AYO23_02695	AYM17_07525	AUR58_10795	AYM93_02340	AYO29_06870	AYM38_09780	CBU_0476	hypothetical protein	0	orthologs
348	AYN00_02365	AYM00_10280	AYM94_02355	AYM02_09905	AYM90_02380	AYM11_09600	AYO24_02700	AYO23_02705	AYM17_07515	AUR58_10785	AYM93_02350	AYO29_06860	AYM38_09770	CBU_0478	hypothetical protein	0	orthologs
358	AYN00_02420	AYM00_10225	AYM94_02410	AYM02_09850	AYM90_02435	AYM11_09545	AYO24_02755	AYO23_02760	AYM17_07460	AUR58_10730	AYM93_02405	AYO29_06805	AYM38_09715	CBU_0488	serine/threonine protein phosphatase	0	orthologs
371	AYN00_02485	AYM00_10160	AYM94_02475	AYM02_09780	AYM90_02500	AYM11_09480	AYO24_02820	AYO23_02825	AYM17_07395	AUR58_10655	AYM93_02470	AYO29_06740	AYM38_09645	CBU_0501	hypothetical protein	0	orthologs
377	AYN00_02530	AYM00_10110	AYM94_02520	AYM02_09725	AYM90_02545	AYM11_09435	AYO24_02870	AYO23_02875	AYM17_07350	AUR58_10600	AYM93_02515	AYO29_06695	AYM38_09600	CBU_0510	hypothetical protein	0	orthologs
378	AYN00_02535	AYM00_10105	AYM94_02525	AYM02_09720	AYM90_02550	AYM11_09430	AYO24_02875	AYO23_02880	AYM17_07345	AUR58_10595	AYM93_02520	AYO29_06690	AYM38_09595	CBU_0510a	hypothetical protein	0	orthologs
379	AYN00_02555	AYM00_10085	AYM94_02545	AYM02_09700	AYM90_02570	AYM11_09410	AYO24_02895	AYO23_02900	AYM17_07325	AUR58_10575	AYM93_02540	AYO29_06670	AYM38_09575	CBU_0514	hypothetical protein	0	orthologs
380	AYN00_02560	AYM00_10080	AYM94_02550	AYM02_09695	AYM90_02575	AYM11_09405	AYO24_02900	AYO23_02905	AYM17_07320	AUR58_10570	AYM93_02545	AYO29_06665	AYM38_09570	CBU_0514a	hypothetical protein	0	orthologs
382	AYN00_02570	AYM00_10070	AYM94_02560	AYM02_09685	AYM90_02585	AYM11_09395	AYO24_02910	AYO23_02915	AYM17_07310	AUR58_10560	AYM93_02555	AYO29_06655	AYM38_09560	CBU_0516	hypothetical protein	0	orthologs
388	AYN00_02610	AYM00_10030	AYM94_02600	AYM02_09645	AYM90_02625	AYM11_09355	AYO24_02950	AYO23_02955	AYM17_07210	AUR58_10520	AYM93_02595	AYO29_06580	AYM38_09520	CBU_0522	hypothetical protein	0	orthologs
394	AYN00_02640	AYM00_09990	AYM94_02635	AYM02_09610	AYM90_02655	AYM11_09325	AYO24_02980	AYO23_02985	AYM17_07180	AUR58_10480	AYM93_02625	AYO29_06545	AYM38_09490	CBU_0529	hypothetical protein	0	orthologs
398	AYN00_02670	AYM00_09960	AYM94_02665	AYM02_09580	AYM90_02685	AYM11_09295	AYO24_03010	AYO23_03015	AYM17_07150	AUR58_10450	AYM93_02655	AYO29_06515	AYM38_09460	CBU_0535	sporulation protein	0	orthologs
399	AYN00_02675	AYM00_09955	AYM94_02670	AYM02_09575	AYM90_02690	AYM11_09290	AYO24_03015	AYO23_03020	AYM17_07145	AUR58_10445	AYM93_02660	AYO29_06510	AYM38_09455	CBU_0536	hypothetical protein	0	orthologs
400	AYN00_02680	AYM00_09950	AYM94_02675	AYM02_09570	AYM90_02695	AYM11_09285	AYO24_03020	AYO23_03025	AYM17_07140	AUR58_10440	AYM93_02665	AYO29_06505	AYM38_09450	CBU_0537	hypothetical protein	0	orthologs
403	AYN00_02695	AYM00_09935	AYM94_02690	AYM02_09555	AYM90_02710	AYM11_09270	AYO24_03035	AYO23_03040	AYM17_07125	AUR58_10425	AYM93_02680	AYO29_06490	AYM38_09435	CBU_0541	cell division protein ZipA	0	orthologs
405	AYN00_02710	AYM00_09920	AYM94_02705	AYM02_09540	AYM90_02725	AYM11_09255	AYO24_03050	AYO23_03055	AYM17_07110	AUR58_10410	AYM93_02695	AYO29_06465	AYM38_09420	CBU_0544	hypothetical protein	0	orthologs
413	AYN00_02760	AYM00_09875	AYM94_02755	AYM02_09490	AYM90_02775	AYM11_09210	AYO24_03095	AYO23_03105	AYM17_07065	AUR58_10355	AYM93_02745	AYO29_06420	AYM38_09370	CBU_0555	hypothetical protein	0	orthologs
418	AYN00_02785	AYM00_09850	AYM94_02780	AYM02_09465	AYM90_02800	AYM11_09185	AYO24_03120	AYO23_03130	AYM17_07040	AUR58_10330	AYM93_02770	AYO29_06395	AYM38_09345	CBU_0560	hypothetical protein	0	orthologs
430	AYN00_02860	AYM00_09770	AYM94_02855	AYM02_09385	AYM90_02875	AYM11_09105	AYO24_03195	AYO23_03205	AYM17_06965	AUR58_10250	AYM93_02845	AYO29_06315	AYM38_09265	CBU_0577	hypothetical protein	0	orthologs
437	AYN00_02900	AYM00_09675	AYM94_02895	AYM02_09295	AYM90_02915	AYM11_09020	AYO24_03235	AYO23_03245	AYM17_06925	AUR58_10155	AYM93_02885	AYO29_06275	AYM38_09180	CBU_0585	hypothetical protein	0	orthologs
442	AYN00_02930	AYM00_09705	AYM94_02925	AYM02_09325	AYM90_02945	AYM11_09050	AYO24_03265	AYO23_03275	AYM17_06895	AUR58_10185	AYM93_02915	AYO29_06245	AYM38_09210	CBU_0591	hypothetical protein	0	orthologs
443	AYN00_02935	AYM00_09710	AYM94_02930	AYM02_09330	AYM90_02950	AYM11_09055	AYO24_03270	AYO23_03280	AYM17_06890	AUR58_10190	AYM93_02920	AYO29_06240	AYM38_09215	CBU_0592	hypothetical protein	0	orthologs
444	AYN00_02960	AYM00_09730	AYM94_02955	AYM02_09350	AYM90_02975	AYM11_09075	AYO24_03290	AYO23_03300	AYM17_06875	AUR58_10210	AYM93_02945	AYO29_06220	AYM38_09235	CBU_0596a	hypothetical protein	0	orthologs
456	AYN00_03055	AYM00_09545	AYM94_03050	AYM02_09180	AYM90_03070	AYM11_08910	AYO24_03385	AYO23_03395	AYM17_06790	AUR58_10005	AYM93_03040	AYO29_07110	AYM38_09065	CBU_0617	hypothetical protein	0	orthologs
461	AYN00_03090	AYM00_06590	AYM94_03085	AYM02_06305	AYM90_03105	AYM11_06100	AYO24_03425	AYO23_03435	AYM17_06755	AUR58_07000	AYM93_03075	AYO29_07950	AYM38_06240	CBU_0624	hypothetical protein	0	orthologs
462	AYN00_03095	AYM00_06595	AYM94_03090	AYM02_06310	AYM90_03110	AYM11_06105	AYO24_03430	AYO23_03440	AYM17_06750	AUR58_07005	AYM93_03080	AYO29_07945	AYM38_06245	CBU_0625	hypothetical protein	0	orthologs
463	AYN00_03100	AYM00_06600	AYM94_03095	AYM02_06315	AYM90_03115	AYM11_06110	AYO24_03435	AYO23_03445	AYM17_06745	AUR58_07010	AYM93_03085	AYO29_07940	AYM38_06250	CBU_0626	hypothetical protein	0	orthologs
464	AYN00_03105	AYM00_06605	AYM94_03100	AYM02_06320	AYM90_03120	AYM11_06115	AYO24_03440	AYO23_03450	AYM17_06740	AUR58_07015	AYM93_03090	AYO29_07935	AYM38_06255	CBU_0627	hypothetical protein	0	orthologs
479	AYN00_03185	AYM00_06695	AYM94_03180	AYM02_06405	AYM90_03200	AYM11_06195	AYO24_03520	AYO23_03530	AYM17_06660	AUR58_07105	AYM93_03170	AYO29_07855	AYM38_06340	CBU_0644	plasmid stabilization protein	0	orthologs
480	AYN00_03190	AYM00_06700	AYM94_03185	AYM02_06410	AYM90_03205	AYM11_06200	AYO24_03525	AYO23_03535	AYM17_06655	AUR58_07110	AYM93_03175	AYO29_07850	AYM38_06345	CBU_0645	prevent-host-death protein	0	orthologs
487	AYN00_03255	AYM00_06765	AYM94_03250	AYM02_06475	AYM90_03270	AYM11_06265	AYO24_03590	AYO23_03600	AYM17_06595	AUR58_07175	AYM93_03240	AYO29_07800	AYM38_06410	CBU_0658	hypothetical protein	0	orthologs
489	AYN00_03280	AYM00_06790	AYM94_03275	AYM02_06500	AYM90_03295	AYM11_06290	AYO24_03615	AYO23_03625	AYM17_06570	AUR58_07200	AYM93_03265	AYO29_07775	AYM38_06435	CBU_0662	hypothetical protein	0	orthologs
492	AYN00_03310	AYM00_06815	AYM94_03305	AYM02_06525	AYM90_03325	AYM11_06310	AYO24_03645	AYO23_03655	AYM17_06545	AUR58_07230	AYM93_03295	AYO29_07745	AYM38_06460	CBU_0668	hypothetical protein	0	orthologs
493	AYN00_03315	AYM00_06820	AYM94_03310	AYM02_06530	AYM90_03330	AYM11_06315	AYO24_03650	AYO23_03660	AYM17_06540	AUR58_07235	AYM93_03300	AYO29_07740	AYM38_06465	CBU_0669	hypothetical protein	0	orthologs
498	AYN00_03400	AYM00_06905	AYM94_03395	AYM02_06615	AYM90_03415	AYM11_06400	AYO24_03735	AYO23_03745	AYM17_06455	AUR58_07320	AYM93_03385	AYO29_07655	AYM38_06520	CBU_0683	FkbM family methyltransferase	0	orthologs
499	AYN00_03410	AYM00_06915	AYM94_03405	AYM02_06625	AYM90_03425	AYM11_06410	AYO24_03745	AYO23_03755	AYM17_06445	AUR58_07330	AYM93_03395	AYO29_07645	AYM38_06530	CBU_0685	hypothetical protein	0	orthologs
505	AYN00_03460	AYM00_06970	AYM94_03460	AYM02_06675	AYM90_03475	AYM11_06460	AYO24_03795	AYO23_03805	AYM17_06395	AUR58_07380	AYM93_03450	AYO29_07595	AYM38_06580	CBU_0695	hypothetical protein	0	orthologs
508	AYN00_03475	AYM00_06985	AYM94_03475	AYM02_06690	AYM90_03490	AYM11_06475	AYO24_03810	AYO23_03820	AYM17_06380	AUR58_07395	AYM93_03465	AYO29_07580	AYM38_06595	CBU_0698	hypothetical protein	0	orthologs
509	AYN00_03480	AYM00_06990	AYM94_03480	AYM02_06695	AYM90_03495	AYM11_06480	AYO24_03815	AYO23_03825	AYM17_06375	AUR58_07400	AYM93_03470	AYO29_07575	AYM38_06600	CBU_0699	sulfotransferase	0	orthologs
514	AYN00_03525	AYM00_07035	AYM94_03525	AYM02_06740	AYM90_03540	AYM11_06525	AYO24_03860	AYO23_03870	AYM17_06330	AUR58_07445	AYM93_03515	AYO29_07530	AYM38_06645	CBU_0707	permease	0	orthologs
517	AYN00_03555	AYM00_07070	AYM94_03555	AYM02_06775	AYM90_03570	AYM11_06560	AYO24_03890	AYO23_03905	AYM17_06295	AUR58_07480	AYM93_03545	AYO29_07495	AYM38_06680	CBU_0714	hypothetical protein	0	orthologs
518	AYN00_03590	AYM00_07095	AYM94_03590	AYM02_06800	AYM90_03605	AYM11_06585	AYO24_03925	AYO23_03940	AYM17_06270	AUR58_07510	AYM93_03580	AYO29_07470	AYM38_06705	CBU_0718	hypothetical protein	0	orthologs
519	AYN00_03595	AYM00_07090	AYM94_03595	AYM02_06795	AYM90_03610	AYM11_06580	AYO24_03930	AYO23_03945	AYM17_06265	AUR58_07505	AYM93_03585	AYO29_07475	AYM38_06700	CBU_0719	hypothetical protein	0	orthologs
527	AYN00_03640	AYM00_09010	AYM94_03640	AYM02_08675	AYM90_03655	AYM11_08430	AYO24_05760	AYO23_05775	AYM17_06215	AUR58_09450	AYM93_03630	AYO29_01750	AYM38_08570	CBU_0731	hypothetical protein	0	orthologs
528	AYN00_03655	AYM00_08995	AYM94_03655	AYM02_08660	AYM90_03670	AYM11_08415	AYO24_05745	AYO23_05760	AYM17_06205	AUR58_09435	AYM93_03645	AYO29_01760	AYM38_08555	CBU_0734	hypothetical protein	0	orthologs
530	AYN00_03665	AYM00_08985	AYM94_03665	AYM02_08650	AYM90_03680	AYM11_08405	AYO24_05735	AYO23_05750	AYM17_06195	AUR58_09425	AYM93_03655	AYO29_01770	AYM38_08545	CBU_0736	hypothetical protein	0	orthologs
537	AYN00_03710	AYM00_08940	AYM94_03710	AYM02_08605	AYM90_03725	AYM11_08365	AYO24_05690	AYO23_05705	AYM17_06150	AUR58_09380	AYM93_03700	AYO29_01815	AYM38_08500	CBU_0744	serine kinase	0	orthologs
551	AYN00_03795	AYM00_07270	AYM94_03795	AYM02_06970	AYM90_03810	AYM11_06750	AYO24_05605	AYO23_05620	AYM17_06065	AUR58_07705	AYM93_03785	AYO29_01905	AYM38_06870	CBU_0760	two-component system response regulator	0	orthologs
552	AYN00_03800	AYM00_07275	AYM94_03800	AYM02_06975	AYM90_03815	AYM11_06755	AYO24_05600	AYO23_05615	AYM17_06060	AUR58_07710	AYM93_03790	AYO29_01910	AYM38_06875	CBU_0762	hypothetical protein	0	orthologs
553	AYN00_03805	AYM00_07280	AYM94_03805	AYM02_06980	AYM90_03820	AYM11_06760	AYO24_05595	AYO23_05610	AYM17_06055	AUR58_07715	AYM93_03795	AYO29_01915	AYM38_06880	CBU_0763	hypothetical protein	0	orthologs
555	AYN00_06745	AYM00_07320	AYM94_06765	AYM02_07020	AYM90_06765	AYM11_06800	AYO24_06740	AYO23_06755	AYM17_03445	AUR58_07755	AYM93_06760	AYO29_05760	AYM38_06920	CBU_0768	MFS transporter	0	orthologs
563	AYN00_03890	AYM00_07365	AYM94_03890	AYM02_07065	AYM90_03905	AYM11_06845	AYO24_05510	AYO23_05525	AYM17_05970	AUR58_07800	AYM93_03880	AYO29_02035	AYM38_06965	CBU_0777	ABC transporter permease	0	orthologs
564	AYN00_03910	AYM00_07385	AYM94_03910	AYM02_07085	AYM90_03925	AYM11_06865	AYO24_05490	AYO23_05505	AYM17_05950	AUR58_07820	AYM93_03900	AYO29_02055	AYM38_06985	CBU_0781	hypothetical protein	0	orthologs
565	AYN00_03925	AYM00_07400	AYM94_03925	AYM02_07100	AYM90_03940	AYM11_06880	AYO24_05475	AYO23_05490	AYM17_05930	AUR58_07835	AYM93_03915	AYO29_02070	AYM38_07000	CBU_0784	hypothetical protein	0	orthologs
574	AYN00_04000	AYM00_07475	AYM94_04000	AYM02_07175	AYM90_04015	AYM11_06955	AYO24_05400	AYO23_05415	AYM17_05845	AUR58_07910	AYM93_03990	AYO29_02140	AYM38_07075	CBU_0799	hypothetical protein	0	orthologs
575	AYN00_04005	AYM00_07480	AYM94_04005	AYM02_07180	AYM90_04020	AYM11_06960	AYO24_05395	AYO23_05410	AYM17_05840	AUR58_07915	AYM93_03995	AYO29_02145	AYM38_07080	CBU_0800	hypothetical protein	0	orthologs
577	AYN00_04015	AYM00_07490	AYM94_04015	AYM02_07190	AYM90_04030	AYM11_06970	AYO24_05385	AYO23_05400	AYM17_05830	AUR58_07925	AYM93_04005	AYO29_02155	AYM38_07090	CBU_0802	hypothetical protein	0	orthologs
579	AYN00_04030	AYM00_07505	AYM94_04030	AYM02_07205	AYM90_04045	AYM11_06985	AYO24_05370	AYO23_05385	AYM17_05815	AUR58_07940	AYM93_04020	AYO29_02170	AYM38_07105	CBU_0805	hypothetical protein	0	orthologs
592	AYN00_04140	AYM00_07620	AYM94_04140	AYM02_07315	AYM90_04155	AYM11_07095	AYO24_05255	AYO23_05270	AYM17_05710	AUR58_08060	AYM93_04130	AYO29_02265	AYM38_07215	CBU_0827	hypothetical protein	0	orthologs
600	AYN00_04180	AYM00_07660	AYM94_04180	AYM02_07355	AYM90_04195	AYM11_07135	AYO24_05215	AYO23_05230	AYM17_05670	AUR58_08100	AYM93_04170	AYO29_02305	AYM38_07255	CBU_0835	hypothetical protein	0	orthologs
602	AYN00_04190	AYM00_07670	AYM94_04190	AYM02_07365	AYM90_04205	AYM11_07145	AYO24_05205	AYO23_05220	AYM17_05660	AUR58_08110	AYM93_04180	AYO29_02315	AYM38_07265	CBU_0837	hypothetical protein	0	orthologs
617	AYN00_04275	AYM00_07755	AYM94_04275	AYM02_07450	AYM90_04290	AYM11_07230	AYO24_05120	AYO23_05135	AYM17_05575	AUR58_08195	AYM93_04265	AYO29_02400	AYM38_07350	CBU_0854	hypothetical protein	0	orthologs
622	AYN00_04320	AYM00_07800	AYM94_04320	AYM02_07495	AYM90_04335	AYM11_07275	AYO24_05075	AYO23_05090	AYM17_05530	AUR58_08240	AYM93_04310	AYO29_02445	AYM38_07395	CBU_0863	hypothetical protein	0	orthologs
625	AYN00_04335	AYM00_07815	AYM94_04335	AYM02_07510	AYM90_04350	AYM11_07290	AYO24_05060	AYO23_05075	AYM17_05515	AUR58_08255	AYM93_04325	AYO29_02460	AYM38_07410	CBU_0866	hypothetical protein	0	orthologs
635	AYN00_04420	AYM00_07885	AYM94_04420	AYM02_07580	AYM90_04435	AYM11_07360	AYO24_04975	AYO23_04990	AYM17_05430	AUR58_08325	AYM93_04410	AYO29_02525	AYM38_07480	CBU_0883	hypothetical protein	0	orthologs
637	AYN00_04430	AYM00_07895	AYM94_04430	AYM02_07590	AYM90_04445	AYM11_07370	AYO24_04965	AYO23_04980	AYM17_05420	AUR58_08335	AYM93_04420	AYO29_02535	AYM38_07490	CBU_0885	hypothetical protein	0	orthologs
639	AYN00_04445	AYM00_07910	AYM94_04445	AYM02_07605	AYM90_04460	AYM11_07385	AYO24_04950	AYO23_04965	AYM17_05405	AUR58_08350	AYM93_04435	AYO29_02550	AYM38_07505	CBU_0888	2-oxoglutarate dehydrogenase	0	orthologs
642	AYN00_04460	AYM00_07925	AYM94_04460	AYM02_07620	AYM90_04475	AYM11_07400	AYO24_04935	AYO23_04950	AYM17_05390	AUR58_08365	AYM93_04450	AYO29_02565	AYM38_07520	CBU_0891	hypothetical protein	0	orthologs
649	AYN00_04495	AYM00_07960	AYM94_04495	AYM02_07655	AYM90_04510	AYM11_07435	AYO24_04900	AYO23_04915	AYM17_05355	AUR58_08400	AYM93_04485	AYO29_02600	AYM38_07555	CBU_0898	hypothetical protein	0	orthologs
656	AYN00_04560	AYM00_08025	AYM94_04560	AYM02_07720	AYM90_04580	AYM11_07500	AYO24_04835	AYO23_04850	AYM17_05290	AUR58_08465	AYM93_04550	AYO29_02675	AYM38_07620	CBU_0911	hypothetical protein	0	orthologs
659	AYN00_04575	AYM00_08050	AYM94_04575	AYM02_07740	AYM90_04595	AYM11_07515	AYO24_04820	AYO23_04835	AYM17_05275	AUR58_08490	AYM93_04565	AYO29_04600	AYM38_07640	CBU_0914	hypothetical protein	0	orthologs
660	AYN00_04580	AYM00_08055	AYM94_04580	AYM02_07745	AYM90_04600	AYM11_07520	AYO24_04815	AYO23_04830	AYM17_05270	AUR58_08495	AYM93_04570	AYO29_04595	AYM38_07645	CBU_0915	enhanced entry protein	0	orthologs
663	AYN00_04615	AYM00_08085	AYM94_04615	AYM02_07775	AYM90_04635	AYM11_07550	AYO24_04780	AYO23_04795	AYM17_05245	AUR58_08525	AYM93_04605	AYO29_04565	AYM38_07675	CBU_0921	hypothetical protein	0	orthologs
672	AYN00_04685	AYM00_08155	AYM94_04685	AYM02_07845	AYM90_04705	AYM11_07620	AYO24_04710	AYO23_04725	AYM17_05175	AUR58_08595	AYM93_04675	AYO29_04495	AYM38_07745	CBU_0935	RNA-binding protein	0	orthologs
673	AYN00_04690	AYM00_08160	AYM94_04690	AYM02_07850	AYM90_04710	AYM11_07625	AYO24_04705	AYO23_04720	AYM17_05170	AUR58_08600	AYM93_04680	AYO29_04490	AYM38_07750	CBU_0936	hypothetical protein	0	orthologs
674	AYN00_04695	AYM00_08165	AYM94_04695	AYM02_07855	AYM90_04715	AYM11_07630	AYO24_04700	AYO23_04715	AYM17_05165	AUR58_08605	AYM93_04685	AYO29_04485	AYM38_07755	CBU_0937	hypothetical protein	0	orthologs
678	AYN00_04725	AYM00_08195	AYM94_04725	AYM02_07885	AYM90_04745	AYM11_07660	AYO24_04670	AYO23_04685	AYM17_05135	AUR58_08635	AYM93_04715	AYO29_04455	AYM38_07785	CBU_0942	hypothetical protein	0	orthologs
680	AYN00_04740	AYM00_08210	AYM94_04740	AYM02_07900	AYM90_04760	AYM11_07675	AYO24_04655	AYO23_04670	AYM17_05120	AUR58_08650	AYM93_04730	AYO29_04440	AYM38_07800	CBU_0944	hypothetical protein	0	orthologs
683	AYN00_04800	AYM00_08275	AYM94_04800	AYM02_07965	AYM90_04820	AYM11_07740	AYO24_04595	AYO23_04610	AYM17_05075	AUR58_08715	AYM93_04790	AYO29_04395	AYM38_07865	CBU_0956	hypothetical protein	0	orthologs
684	AYN00_04805	AYM00_08280	AYM94_04805	AYM02_07970	AYM90_04825	AYM11_07745	AYO24_04590	AYO23_04605	AYM17_05070	AUR58_08720	AYM93_04795	AYO29_04390	AYM38_07870	CBU_0957	hypothetical protein	0	orthologs
686	AYN00_04840	AYM00_08315	AYM94_04840	AYM02_08005	AYM90_04860	AYM11_07780	AYO24_04555	AYO23_04570	AYM17_05030	AUR58_08750	AYM93_04830	AYO29_04355	AYM38_07905	CBU_0961	hypothetical protein	0	orthologs
688	AYN00_04855	AYM00_08330	AYM94_04855	AYM02_08020	AYM90_04875	AYM11_07795	AYO24_04540	AYO23_04555	AYM17_05015	AUR58_08765	AYM93_04845	AYO29_04340	AYM38_07920	CBU_0964	hypothetical protein	0	orthologs
689	AYN00_04860	AYM00_08335	AYM94_04860	AYM02_08025	AYM90_04880	AYM11_07800	AYO24_04535	AYO23_04550	AYM17_05010	AUR58_08770	AYM93_04850	AYO29_04335	AYM38_07925	CBU_0964a	hypothetical protein	0	orthologs
692	AYN00_04875	AYM00_08350	AYM94_04875	AYM02_08040	AYM90_04895	AYM11_07815	AYO24_04520	AYO23_04535	AYM17_04995	AUR58_08785	AYM93_04865	AYO29_04320	AYM38_07940	CBU_0967	cyd operon protein YbgT	0	orthologs
693	AYN00_04885	AYM00_08360	AYM94_04885	AYM02_08050	AYM90_04905	AYM11_07825	AYO24_04510	AYO23_04525	AYM17_04985	AUR58_08795	AYM93_04875	AYO29_04310	AYM38_07950	CBU_0970	hypothetical protein	0	orthologs
695	AYN00_04895	AYM00_08370	AYM94_04895	AYM02_08060	AYM90_04915	AYM11_07835	AYO24_04500	AYO23_04515	AYM17_04975	AUR58_08805	AYM93_04885	AYO29_04300	AYM38_07960	CBU_0972	hypothetical protein	0	orthologs
701	AYN00_04925	AYM00_08405	AYM94_04925	AYM02_08095	AYM90_04945	AYM11_07865	AYO24_04470	AYO23_04485	AYM17_04945	AUR58_08845	AYM93_04915	AYO29_04270	AYM38_07995	CBU_0978	hypothetical protein	0	orthologs
702	AYN00_04930	AYM00_08410	AYM94_04930	AYM02_08100	AYM90_04950	AYM11_07870	AYO24_04465	AYO23_04480	AYM17_04940	AUR58_08850	AYM93_04920	AYO29_04265	AYM38_08000	CBU_0979	hypothetical protein	0	orthologs
703	AYN00_04935	AYM00_08415	AYM94_04935	AYM02_08105	AYM90_04955	AYM11_07875	AYO24_04460	AYO23_04475	AYM17_04935	AUR58_08855	AYM93_04925	AYO29_04260	AYM38_08005	CBU_0980	hypothetical protein	0	orthologs
704	AYN00_04940	AYM00_08420	AYM94_04940	AYM02_08110	AYM90_04960	AYM11_07880	AYO24_04455	AYO23_04470	AYM17_04930	AUR58_08860	AYM93_04930	AYO29_04255	AYM38_08010	CBU_0981	hypothetical protein	0	orthologs
707	AYN00_04960	AYM00_08440	AYM94_04960	AYM02_08130	AYM90_04980	AYM11_07900	AYO24_04435	AYO23_04450	AYM17_04905	AUR58_08880	AYM93_04950	AYO29_04230	AYM38_08030	CBU_0985	hypothetical protein	0	orthologs
711	AYN00_05000	AYM00_08480	AYM94_05000	AYM02_08170	AYM90_05020	AYM11_07940	AYO24_04395	AYO23_04410	AYM17_04865	AUR58_08920	AYM93_04990	AYO29_04190	AYM38_08070	CBU_0994	hypothetical protein	0	orthologs
712	AYN00_05005	AYM00_08485	AYM94_05005	AYM02_08175	AYM90_05025	AYM11_07945	AYO24_04390	AYO23_04405	AYM17_04860	AUR58_08925	AYM93_04995	AYO29_04185	AYM38_08075	CBU_0995	cytochrome B	0	orthologs
714	AYN00_05015	AYM00_08495	AYM94_05015	AYM02_08185	AYM90_05035	AYM11_07955	AYO24_04380	AYO23_04395	AYM17_04850	AUR58_08935	AYM93_05005	AYO29_04175	AYM38_08085	CBU_0997	hypothetical protein	0	orthologs
726	AYN00_05110	AYM00_08610	AYM94_05110	AYM02_08290	AYM90_05130	AYM11_08060	AYO24_04285	AYO23_04300	AYM17_04760	AUR58_09045	AYM93_05100	AYO29_04080	AYM38_08185	CBU_1014	hypothetical protein	0	orthologs
727	AYN00_05140	AYM00_08640	AYM94_05140	AYM02_08320	AYM90_05160	AYM11_08090	AYO24_04255	AYO23_04270	AYM17_04725	AUR58_09075	AYM93_05130	AYO29_04060	AYM38_08215	CBU_1023a	hypothetical protein	0	orthologs
736	AYN00_05230	AYM00_08745	AYM94_05235	AYM02_08425	AYM90_05250	AYM11_08190	AYO24_04170	AYO23_04185	AYM17_04610	AUR58_09185	AYM93_05225	AYO29_03960	AYM38_08320	CBU_1041	hypothetical protein	0	orthologs
737	AYN00_05235	AYM00_08750	AYM94_05240	AYM02_08430	AYM90_05255	AYM11_08195	AYO24_04165	AYO23_04180	AYM17_04605	AUR58_09190	AYM93_05230	AYO29_03955	AYM38_08325	CBU_1042	hypothetical protein	0	orthologs
738	AYN00_05250	AYM00_08765	AYM94_05255	AYM02_08445	AYM90_05270	AYM11_08210	AYO24_04150	AYO23_04165	AYM17_04590	AUR58_09205	AYM93_05245	AYO29_03940	AYM38_08340	CBU_1045a	hypothetical protein	0	orthologs
750	AYN00_05345	AYM00_07245	AYM94_05350	AYM02_06940	AYM90_05365	AYM11_06725	AYO24_04055	AYO23_04070	AYM17_04495	AUR58_07670	AYM93_05340	AYO29_04645	AYM38_06845	CBU_1064	hypothetical protein	0	orthologs
755	AYN00_05395	AYM00_07195	AYM94_05400	AYM02_06890	AYM90_05415	AYM11_06675	AYO24_04005	AYO23_04020	AYM17_04450	AUR58_07620	AYM93_05390	AYO29_04695	AYM38_06795	CBU_1073	hypothetical protein	0	orthologs
760	AYN00_05430	AYM00_07160	AYM94_05455	AYM02_06855	AYM90_05450	AYM11_06640	AYO24_03975	AYO23_03990	AYM17_04420	AUR58_07580	AYM93_05450	AYO29_04790	AYM38_06765	CBU_1080	peptidase	0	orthologs
761	AYN00_05435	AYM00_07155	AYM94_05460	AYM02_06850	AYM90_05455	AYM11_06635	AYO24_03970	AYO23_03985	AYM17_04415	AUR58_07575	AYM93_05455	AYO29_04795	AYM38_06760	CBU_1081	hypothetical protein	0	orthologs
767	AYN00_05470	AYM00_09050	AYM94_05495	AYM02_08715	AYM90_05490	AYM11_08470	AYO24_05800	AYO23_05815	AYM17_04375	AUR58_09495	AYM93_05490	AYO29_04895	AYM38_08610	CBU_1089	hypothetical protein	0	orthologs
769	AYN00_05740	AYM00_09070	AYM94_05760	AYM02_08730	AYM90_05500	AYM11_08480	AYO24_05810	AYO23_05825	AYM17_04365	AUR58_09515	AYM93_05755	AYO29_04830	AYM38_08620	CBU_1092	hypothetical protein	0	orthologs
771	AYN00_05760	AYM00_09090	AYM94_05780	AYM02_08750	AYM90_05520	AYM11_08500	AYO24_05830	AYO23_05845	AYM17_04345	AUR58_09535	AYM93_05775	AYO29_04850	AYM38_08640	CBU_1095	hypothetical protein	0	orthologs
774	AYN00_05780	AYM00_09110	AYM94_05800	AYM02_08770	AYM90_05540	AYM11_08520	AYO24_05850	AYO23_05865	AYM17_00350	AUR58_09555	AYM93_05795	AYO29_04870	AYM38_08660	CBU_1098	hypothetical protein	0	orthologs
775	AYN00_05785	AYM00_09125	AYM94_05805	AYM02_08780	AYM90_05545	AYM11_08525	AYO24_05855	AYO23_05870	AYM17_04320	AUR58_09570	AYM93_05800	AYO29_04875	AYM38_08665	CBU_1099	S26 family signal peptidase	0	orthologs
776	AYN00_05790	AYM00_09130	AYM94_05810	AYM02_08785	AYM90_05550	AYM11_08530	AYO24_05860	AYO23_05875	AYM17_04315	AUR58_09575	AYM93_05805	AYO29_04880	AYM38_08670	CBU_1100	hypothetical protein	0	orthologs
777	AYN00_05840	AYM00_09140	AYM94_05860	AYM02_08795	AYM90_05860	AYM11_08540	AYO24_05915	AYO23_05930	AYM17_04285	AUR58_09595	AYM93_05855	AYO29_04940	AYM38_08680	CBU_1115	hypothetical protein	0	orthologs
783	AYN00_05870	AYM00_09170	AYM94_05890	AYM02_08825	AYM90_05890	AYM11_08570	AYO24_05945	AYO23_05960	AYM17_04255	AUR58_09625	AYM93_05885	AYO29_04970	AYM38_08710	CBU_1121	hypothetical protein	0	orthologs
786	AYN00_05885	AYM00_09195	AYM94_05905	AYM02_08840	AYM90_05905	AYM11_08585	AYO24_05965	AYO23_05980	AYM17_04240	AUR58_09650	AYM93_05900	AYO29_04990	AYM38_08730	CBU_1124	chaperone modulatory protein CbpM	0	orthologs
787	AYN00_05905	AYM00_09215	AYM94_05925	AYM02_08860	AYM90_05925	AYM11_08605	AYO24_05985	AYO23_06000	AYM17_04215	AUR58_09670	AYM93_05920	AYO29_05010	AYM38_08750	CBU_1128	hypothetical protein	0	orthologs
791	AYN00_05935	AYM00_09245	AYM94_05955	AYM02_08890	AYM90_05955	AYM11_08635	AYO24_06015	AYO23_06030	AYM17_04185	AUR58_09700	AYM93_05950	AYO29_05040	AYM38_08780	CBU_1134	hypothetical protein	0	orthologs
792	AYN00_05940	AYM00_09250	AYM94_05960	AYM02_08895	AYM90_05960	AYM11_08640	AYO24_06020	AYO23_06035	AYM17_04180	AUR58_09705	AYM93_05955	AYO29_05045	AYM38_08785	CBU_1135	hypothetical protein	0	orthologs
796	AYN00_05960	AYM00_09280	AYM94_05980	AYM02_08920	AYM90_05980	AYM11_08660	AYO24_06040	AYO23_06055	AYM17_04160	AUR58_09735	AYM93_05975	AYO29_05065	AYM38_08810	CBU_1138a	hypothetical protein	0	orthologs
797	AYN00_05965	AYM00_09285	AYM94_05985	AYM02_08925	AYM90_05985	AYM11_08665	AYO24_06045	AYO23_06060	AYM17_04155	AUR58_09740	AYM93_05980	AYO29_05070	AYM38_08815	CBU_1139	hypothetical protein	0	orthologs
806	AYN00_06065	AYM00_09395	AYM94_06085	AYM02_09030	AYM90_06085	AYM11_08765	AYO24_06145	AYO23_06160	AYM17_04060	AUR58_09850	AYM93_06080	AYO29_05170	AYM38_08920	CBU_1157	hypothetical protein	0	orthologs
807	AYN00_06075	AYM00_09405	AYM94_06095	AYM02_09040	AYM90_06095	AYM11_08775	AYO24_06155	AYO23_06170	AYM17_04050	AUR58_09860	AYM93_06090	AYO29_05180	AYM38_08930	CBU_1159	hypothetical protein	0	orthologs
808	AYN00_06080	AYM00_09410	AYM94_06100	AYM02_09045	AYM90_06100	AYM11_08780	AYO24_06160	AYO23_06175	AYM17_04045	AUR58_09865	AYM93_06095	AYO29_05185	AYM38_08935	CBU_1160	hypothetical protein	0	orthologs
812	AYN00_06155	AYM00_09480	AYM94_06175	AYM02_09115	AYM90_06175	AYM11_08850	AYO24_06230	AYO23_06245	AYM17_03980	AUR58_09935	AYM93_06170	AYO29_05250	AYM38_09005	CBU_1177	hypothetical protein	0	orthologs
814	AYN00_06170	AYM00_09495	AYM94_06190	AYM02_09130	AYM90_06190	AYM11_08865	AYO24_06245	AYO23_06260	AYM17_03965	AUR58_09950	AYM93_06185	AYO29_05270	AYM38_09020	CBU_1180	hypothetical protein	0	orthologs
817	AYN00_06185	AYM00_09510	AYM94_06205	AYM02_09145	AYM90_06205	AYM11_08880	AYO24_06260	AYO23_06275	AYM17_03950	AUR58_09965	AYM93_06200	AYO29_05285	AYM38_09035	CBU_1183	RNA-binding protein	0	orthologs
820	AYN00_06210	AYM00_06550	AYM94_06540	AYM02_06270	AYM90_06230	AYM11_06070	AYO24_06285	AYO23_06300	AYM17_03930	AUR58_06960	AYM93_06535	AYO29_05310	AYM38_06200	CBU_1187	hypothetical protein	0	orthologs
828	AYN00_06255	AYM00_06505	AYM94_06585	AYM02_06225	AYM90_06275	AYM11_06025	AYO24_06330	AYO23_06345	AYM17_03885	AUR58_06915	AYM93_06580	AYO29_05355	AYM38_06155	CBU_1197	hypothetical protein	0	orthologs
829	AYN00_06260	AYM00_06500	AYM94_06590	AYM02_06220	AYM90_06280	AYM11_06020	AYO24_06335	AYO23_06350	AYM17_03880	AUR58_06910	AYM93_06585	AYO29_05360	AYM38_06150	CBU_1198	hypothetical protein	0	orthologs
830	AYN00_06265	AYM00_06495	AYM94_06595	AYM02_06215	AYM90_06285	AYM11_06015	AYO24_06340	AYO23_06355	AYM17_03875	AUR58_06905	AYM93_06590	AYO29_05365	AYM38_06145	CBU_1199	hypothetical protein	0	orthologs
833	AYN00_06280	AYM00_06480	AYM94_06610	AYM02_06200	AYM90_06300	AYM11_06000	AYO24_06355	AYO23_06370	AYM17_03860	AUR58_06890	AYM93_06605	AYO29_05380	AYM38_06130	CBU_1202	hypothetical protein	0	orthologs
835	AYN00_06295	AYM00_06465	AYM94_06625	AYM02_06185	AYM90_06315	AYM11_05985	AYO24_06370	AYO23_06385	AYM17_03845	AUR58_06875	AYM93_06620	AYO29_05395	AYM38_06115	CBU_1206	delta(24(24(1)))-sterol reductase	0	orthologs
836	AYN00_06300	AYM00_06460	AYM94_06630	AYM02_06180	AYM90_06320	AYM11_05980	AYO24_06375	AYO23_06390	AYM17_03840	AUR58_06870	AYM93_06625	AYO29_05400	AYM38_06110	CBU_1207	hypothetical protein	0	orthologs
837	AYN00_06335	AYM00_06420	AYM94_06665	AYM02_06140	AYM90_06355	AYM11_05940	AYO24_06390	AYO23_06405	AYM17_03800	AUR58_06830	AYM93_06660	AYO29_05415	AYM38_06070	CBU_1216a	hypothetical protein	0	orthologs
839	AYN00_05485	AYM00_06385	AYM94_05510	AYM02_06115	AYM90_05580	AYM11_05915	AYO24_06415	AYO23_06430	AYM17_03775	AUR58_06795	AYM93_05505	AYO29_05445	AYM38_06040	CBU_1221	hypothetical protein	0	orthologs
843	AYN00_05510	AYM00_06355	AYM94_05530	AYM02_06095	AYM90_05605	AYM11_05890	AYO24_06440	AYO23_06450	AYM17_03755	AUR58_06760	AYM93_05525	AYO29_05465	AYM38_06020	CBU_1224a	hypothetical protein	0	orthologs
848	AYN00_05535	AYM00_06330	AYM94_05555	AYM02_06070	AYM90_05630	AYM11_05865	AYO24_06465	AYO23_06475	AYM17_03730	AUR58_06735	AYM93_05550	AYO29_05490	AYM38_05995	CBU_1229	ATP-dependent helicase	0	orthologs
850	AYN00_05550	AYM00_06305	AYM94_05570	AYM02_06050	AYM90_05645	AYM11_05850	AYO24_06480	AYO23_06490	AYM17_03715	AUR58_06710	AYM93_05565	AYO29_05510	AYM38_05980	CBU_1233	5'-nucleotidase	0	orthologs
853	AYN00_05565	AYM00_06290	AYM94_05585	AYM02_06035	AYM90_05660	AYM11_05835	AYO24_06495	AYO23_06505	AYM17_03700	AUR58_06695	AYM93_05580	AYO29_05525	AYM38_05965	CBU_1236	hypothetical protein	0	orthologs
855	AYN00_05575	AYM00_06280	AYM94_05595	AYM02_06025	AYM90_05670	AYM11_05825	AYO24_06505	AYO23_06515	AYM17_03690	AUR58_06685	AYM93_05590	AYO29_05535	AYM38_05955	CBU_1238	CopG family transcriptional regulator	0	orthologs
863	AYN00_05625	AYM00_06225	AYM94_05645	AYM02_05975	AYM90_05720	AYM11_05775	AYO24_06555	AYO23_06565	AYM17_03640	AUR58_06625	AYM93_05640	AYO29_05585	AYM38_05900	CBU_1249	DNA-binding protein	0	orthologs
864	AYN00_05630	AYM00_06220	AYM94_05650	AYM02_05970	AYM90_05725	AYM11_05770	AYO24_06560	AYO23_06570	AYM17_03635	AUR58_06620	AYM93_05645	AYO29_05590	AYM38_05895	CBU_1250	hypothetical protein	0	orthologs
867	AYN00_05660	AYM00_06190	AYM94_05680	AYM02_05940	AYM90_05755	AYM11_05740	AYO24_06590	AYO23_06600	AYM17_03605	AUR58_06590	AYM93_05675	AYO29_05620	AYM38_05865	CBU_1256	hypothetical protein	0	orthologs
868	AYN00_05665	AYM00_06185	AYM94_05685	AYM02_05935	AYM90_05760	AYM11_05735	AYO24_06595	AYO23_06605	AYM17_03600	AUR58_06585	AYM93_05680	AYO29_05625	AYM38_05860	CBU_1257	hypothetical protein	0	orthologs
871	AYN00_05680	AYM00_06160	AYM94_05700	AYM02_05910	AYM90_05775	AYM11_05715	AYO24_06610	AYO23_06625	AYM17_03580	AUR58_06560	AYM93_05695	AYO29_05640	AYM38_05840	CBU_1260	hypothetical protein	0	orthologs
874	AYN00_05695	AYM00_06145	AYM94_05715	AYM02_05895	AYM90_05790	AYM11_05700	AYO24_06625	AYO23_06640	AYM17_03565	AUR58_06545	AYM93_05710	AYO29_05655	AYM38_05825	CBU_1263	hypothetical protein	0	orthologs
877	AYN00_05720	AYM00_06110	AYM94_05740	AYM02_05865	AYM90_05815	AYM11_05675	AYO24_06650	AYO23_06665	AYM17_03540	AUR58_06510	AYM93_05735	AYO29_05680	AYM38_05795	CBU_1267a	protein scvA	0	orthologs
878	AYN00_05725	AYM00_06105	AYM94_05745	AYM02_05860	AYM90_05820	AYM11_05670	AYO24_06655	AYO23_06670	AYM17_03535	AUR58_06505	AYM93_05740	AYO29_05685	AYM38_05790	CBU_1268	pyridine nucleotide-disulfide oxidoreductase	0	orthologs
880	AYN00_06670	AYM00_06085	AYM94_06690	AYM02_05850	AYM90_06690	AYM11_05660	AYO24_06665	AYO23_06680	AYM17_03520	AUR58_06485	AYM93_06685	AYO29_05695	AYM38_05780	CBU_1272	hypothetical protein	0	orthologs
882	AYN00_06680	AYM00_06075	AYM94_06700	AYM02_05840	AYM90_06700	AYM11_05650	AYO24_06675	AYO23_06690	AYM17_03510	AUR58_06475	AYM93_06695	AYO29_05705	AYM38_05770	CBU_1274	hypothetical protein	0	orthologs
888	AYN00_06710	AYM00_06045	AYM94_06730	AYM02_05810	AYM90_06730	AYM11_05620	AYO24_06705	AYO23_06720	AYM17_03480	AUR58_06445	AYM93_06725	AYO29_05735	AYM38_05740	CBU_1279a	hypothetical protein	0	orthologs
890	AYN00_06720	AYM00_06035	AYM94_06740	AYM02_05800	AYM90_06740	AYM11_05610	AYO24_06715	AYO23_06730	AYM17_03470	AUR58_06435	AYM93_06735	AYO29_05745	AYM38_05730	CBU_1280a	hypothetical protein	0	orthologs
896	AYN00_06770	AYM00_05985	AYM94_06790	AYM02_05750	AYM90_06790	AYM11_05560	AYO24_06765	AYO23_06780	AYM17_03420	AUR58_06385	AYM93_06785	AYO29_05795	AYM38_05680	CBU_1291	acetyl-CoA carboxylase biotin carboxyl carrier protein subunit	0	orthologs
900	AYN00_06790	AYM00_05965	AYM94_06810	AYM02_05730	AYM90_06810	AYM11_05540	AYO24_06785	AYO23_06800	AYM17_03400	AUR58_06365	AYM93_06805	AYO29_05815	AYM38_05660	CBU_1295	hypothetical protein	0	orthologs
903	AYN00_06815	AYM00_05930	AYM94_06835	AYM02_05700	AYM90_06835	AYM11_05515	AYO24_06810	AYO23_06825	AYM17_03375	AUR58_06330	AYM93_06830	AYO29_05855	AYM38_05630	CBU_1300	hypothetical protein	0	orthologs
910	AYN00_06850	AYM00_05895	AYM94_06870	AYM02_05665	AYM90_06870	AYM11_05480	AYO24_06845	AYO23_06860	AYM17_03340	AUR58_06295	AYM93_06865	AYO29_05890	AYM38_05595	CBU_1307	hypothetical protein	0	orthologs
911	AYN00_06870	AYM00_05875	AYM94_06890	AYM02_05645	AYM90_06890	AYM11_05460	AYO24_06865	AYO23_06880	AYM17_03320	AUR58_06280	AYM93_06885	AYO29_05910	AYM38_05575	CBU_1310	hypothetical protein	0	orthologs
912	AYN00_06885	AYM00_05860	AYM94_06905	AYM02_05630	AYM90_06905	AYM11_05445	AYO24_06880	AYO23_06895	AYM17_03310	AUR58_06265	AYM93_06900	AYO29_05920	AYM38_05560	CBU_1313	hypothetical protein	0	orthologs
913	AYN00_06905	AYM00_05840	AYM94_06925	AYM02_05610	AYM90_06925	AYM11_05425	AYO24_06900	AYO23_06915	AYM17_03295	AUR58_06245	AYM93_06920	AYO29_05940	AYM38_05540	CBU_1316a	hypothetical protein	0	orthologs
914	AYN00_06910	AYM00_05835	AYM94_06930	AYM02_05605	AYM90_06930	AYM11_05420	AYO24_06905	AYO23_06920	AYM17_03290	AUR58_06240	AYM93_06925	AYO29_05945	AYM38_05535	CBU_1317	hypothetical protein	0	orthologs
920	AYN00_06950	AYM00_05795	AYM94_06970	AYM02_05565	AYM90_06970	AYM11_05380	AYO24_06945	AYO23_06960	AYM17_03250	AUR58_06200	AYM93_06965	AYO29_05985	AYM38_05495	CBU_1323a	hypothetical protein	0	orthologs
927	AYN00_06995	AYM00_05750	AYM94_07015	AYM02_05520	AYM90_07015	AYM11_05335	AYO24_06990	AYO23_07005	AYM17_03205	AUR58_06155	AYM93_07010	AYO29_06030	AYM38_05450	CBU_1334	hypothetical protein	0	orthologs
934	AYN00_07070	AYM00_05655	AYM94_07090	AYM02_05425	AYM90_07090	AYM11_05245	AYO24_07065	AYO23_07080	AYM17_03130	AUR58_06060	AYM93_07085	AYO29_06105	AYM38_05360	CBU_1349	hypothetical protein	0	orthologs
949	AYN00_07150	AYM00_05570	AYM94_07170	AYM02_05340	AYM90_07170	AYM11_05165	AYO24_07145	AYO23_07160	AYM17_03050	AUR58_05970	AYM93_07165	AYO29_06185	AYM38_05275	CBU_1366	hypothetical protein	0	orthologs
951	AYN00_07175	AYM00_10435	AYM94_07195	AYM02_10070	AYM90_07195	AYM11_09755	AYO24_07170	AYO23_07185	AYM17_03025	AUR58_10950	AYM93_07190	AYO29_04740	AYM38_09930	CBU_1372	hypothetical protein	0	orthologs
962	AYN00_07250	AYM00_10510	AYM94_07270	AYM02_10145	AYM90_07270	AYM11_09830	AYO24_07245	AYO23_07260	AYM17_02950	AUR58_11025	AYM93_07265	AYO29_07225	AYM38_10005	CBU_1387	hypothetical protein	0	orthologs
965	AYN00_07300	AYM00_10565	AYM94_07320	AYM02_10200	AYM90_07320	AYM11_09885	AYO24_07295	AYO23_07310	AYM17_02920	AUR58_11080	AYM93_07315	AYO29_07275	AYM38_10060	CBU_1395	hypothetical protein	0	orthologs
975	AYN00_07365	AYM00_10635	AYM94_07385	AYM02_10275	AYM90_07385	AYM11_09950	AYO24_07365	AYO23_07375	AYM17_02850	AUR58_11155	AYM93_07380	AYO29_07350	AYM38_10125	CBU_1412	hypothetical protein	0	orthologs
976	AYN00_07370	AYM00_10640	AYM94_07390	AYM02_10280	AYM90_07390	AYM11_09955	AYO24_07370	AYO23_07380	AYM17_02845	AUR58_11160	AYM93_07385	AYO29_07355	AYM38_10130	CBU_1413	hypothetical protein	0	orthologs
977	AYN00_07375	AYM00_10645	AYM94_07395	AYM02_10285	AYM90_07395	AYM11_09960	AYO24_07375	AYO23_07385	AYM17_02840	AUR58_11165	AYM93_07390	AYO29_07360	AYM38_10135	CBU_1414	hypothetical protein	0	orthologs
979	AYN00_07385	AYM00_10655	AYM94_07405	AYM02_10295	AYM90_07405	AYM11_09970	AYO24_07385	AYO23_07395	AYM17_02830	AUR58_11175	AYM93_07400	AYO29_07370	AYM38_10145	CBU_1416	transcriptional regulator	0	orthologs
984	AYN00_07415	AYM00_10685	AYM94_07435	AYM02_10325	AYM90_07435	AYM11_10000	AYO24_07415	AYO23_07425	AYM17_02800	AUR58_11205	AYM93_07430	AYO29_07400	AYM38_10175	CBU_1422a	hypothetical protein	0	orthologs
987	AYN00_07430	AYM00_10700	AYM94_07450	AYM02_10340	AYM90_07450	AYM11_10015	AYO24_07430	AYO23_07440	AYM17_02785	AUR58_11220	AYM93_07445	AYO29_07420	AYM38_10190	CBU_1426	hypothetical protein	0	orthologs
1010	AYN00_07570	AYM00_04915	AYM94_07590	AYM02_04685	AYM90_07590	AYM11_04515	AYO24_07575	AYO23_07585	AYM17_02630	AUR58_05265	AYM93_07585	AYO29_08265	AYM38_04630	CBU_1451	peptidylprolyl isomerase	0	orthologs
1012	AYN00_07605	AYM00_04880	AYM94_07625	AYM02_04650	AYM90_07625	AYM11_04480	AYO24_07610	AYO23_07620	AYM17_02600	AUR58_05230	AYM93_07620	AYO29_08290	AYM38_04595	CBU_1458a	hypothetical protein	0	orthologs
1013	AYN00_07625	AYM00_04855	AYM94_07645	AYM02_04630	AYM90_07645	AYM11_04460	AYO24_07635	AYO23_07645	AYM17_02575	AUR58_05210	AYM93_07640	AYO29_08315	AYM38_04575	CBU_1462a	hypothetical protein	0	orthologs
1014	AYN00_07640	AYM00_04835	AYM94_07660	AYM02_04615	AYM90_07660	AYM11_04445	AYO24_07650	AYO23_07660	AYM17_02560	AUR58_05185	AYM93_07655	AYO29_08330	AYM38_04560	CBU_1463	hypothetical protein	0	orthologs
1017	AYN00_07655	AYM00_04820	AYM94_07675	AYM02_04600	AYM90_07675	AYM11_04430	AYO24_07665	AYO23_07675	AYM17_02545	AUR58_05170	AYM93_07670	AYO29_08345	AYM38_04545	CBU_1466	hypothetical protein	0	orthologs
1023	AYN00_07685	AYM00_04790	AYM94_07705	AYM02_04570	AYM90_07705	AYM11_04400	AYO24_07695	AYO23_07705	AYM17_02515	AUR58_05140	AYM93_07700	AYO29_08375	AYM38_04515	CBU_1472	hypothetical protein	0	orthologs
1030	AYN00_07720	AYM00_04740	AYM94_07740	AYM02_04530	AYM90_07740	AYM11_04365	AYO24_07730	AYO23_07740	AYM17_02480	AUR58_05080	AYM93_07735	AYO29_08200	AYM38_04470	CBU_1479	hypothetical protein	0	orthologs
1040	AYN00_07810	AYM00_04615	AYM94_07830	AYM02_04430	AYM90_07830	AYM11_04270	AYO24_07825	AYO23_07835	AYM17_02395	AUR58_04950	AYM93_07825	AYO29_08425	AYM38_04375	CBU_1497	hypothetical protein	0	orthologs
1047	AYN00_07855	AYM00_04550	AYM94_07875	AYM02_04375	AYM90_07875	AYM11_04225	AYO24_07870	AYO23_07880	AYM17_02350	AUR58_04885	AYM93_07870	AYO29_08470	AYM38_04325	CBU_1508	ATPase	0	orthologs
1053	AYN00_07890	AYM00_04515	AYM94_07910	AYM02_04340	AYM90_07910	AYM11_04190	AYO24_07905	AYO23_07915	AYM17_02315	AUR58_04850	AYM93_07905	AYO29_08505	AYM38_04290	CBU_1515	hypothetical protein	0	orthologs
1059	AYN00_07950	AYM00_04455	AYM94_07970	AYM02_04285	AYM90_07965	AYM11_04135	AYO24_07960	AYO23_07970	AYM17_02260	AUR58_04795	AYM93_07965	AYO29_08560	AYM38_04230	CBU_1526a	hypothetical protein	0	orthologs
1065	AYN00_08010	AYM00_04385	AYM94_08030	AYM02_04220	AYM90_08025	AYM11_04075	AYO24_08030	AYO23_08035	AYM17_02210	AUR58_04725	AYM93_08025	AYO29_08615	AYM38_04170	CBU_1540	hypothetical protein	0	orthologs
1066	AYN00_08015	AYM00_04380	AYM94_08035	AYM02_04215	AYM90_08030	AYM11_04070	AYO24_08035	AYO23_08040	AYM17_02205	AUR58_04720	AYM93_08030	AYO29_08620	AYM38_04165	CBU_1541	hypothetical protein	0	orthologs
1067	AYN00_08020	AYM00_04375	AYM94_08040	AYM02_04210	AYM90_08035	AYM11_04065	AYO24_08040	AYO23_08045	AYM17_02200	AUR58_04715	AYM93_08035	AYO29_08625	AYM38_04160	CBU_1542	hypothetical protein	0	orthologs
1069	AYN00_08035	AYM00_04340	AYM94_08055	AYM02_04180	AYM90_08055	AYM11_04035	AYO24_08055	AYO23_08060	AYM17_02170	AUR58_04675	AYM93_08050	AYO29_08645	AYM38_04135	CBU_1548	hypothetical protein	0	orthologs
1073	AYN00_08055	AYM00_04320	AYM94_08075	AYM02_04160	AYM90_08075	AYM11_04015	AYO24_08075	AYO23_08080	AYM17_02150	AUR58_04655	AYM93_08070	AYO29_08665	AYM38_04115	CBU_1552	hypothetical protein	0	orthologs
1074	AYN00_08060	AYM00_04315	AYM94_08080	AYM02_04155	AYM90_08080	AYM11_04010	AYO24_08080	AYO23_08085	AYM17_02145	AUR58_04650	AYM93_08075	AYO29_08670	AYM38_04110	CBU_1552a	hypothetical protein	0	orthologs
1078	AYN00_08075	AYM00_04285	AYM94_08095	AYM02_04135	AYM90_08095	AYM11_03990	AYO24_08095	AYO23_08100	AYM17_02125	AUR58_04615	AYM93_08090	AYO29_08700	AYM38_04090	CBU_1556	hypothetical protein	0	orthologs
1081	AYN00_08090	AYM00_04270	AYM94_08110	AYM02_04120	AYM90_08110	AYM11_03975	AYO24_08110	AYO23_08115	AYM17_02110	AUR58_04600	AYM93_08105	AYO29_08715	AYM38_04075	CBU_1559a	hypothetical protein	0	orthologs
1082	AYN00_08095	AYM00_04265	AYM94_08115	AYM02_04115	AYM90_08115	AYM11_03970	AYO24_08115	AYO23_08120	AYM17_02105	AUR58_04595	AYM93_08110	AYO29_08720	AYM38_04070	CBU_1560	hypothetical protein	0	orthologs
1083	AYN00_08100	AYM00_04260	AYM94_08120	AYM02_04110	AYM90_08120	AYM11_03965	AYO24_08120	AYO23_08125	AYM17_02100	AUR58_04590	AYM93_08115	AYO29_08725	AYM38_04065	CBU_1561	hypothetical protein	0	orthologs
1094	AYN00_08190	AYM00_04160	AYM94_08215	AYM02_04015	AYM90_08210	AYM11_03875	AYO24_08210	AYO23_08215	AYM17_00320	AUR58_04480	AYM93_08210	AYO29_08825	AYM38_03975	CBU_1581	hypothetical protein	0	orthologs
1099	AYN00_08220	AYM00_04130	AYM94_08245	AYM02_03985	AYM90_08240	AYM11_03845	AYO24_08240	AYO23_08245	AYM17_01990	AUR58_04450	AYM93_08240	AYO29_08855	AYM38_03945	CBU_1587	cation:proton antiporter	0	orthologs
1101	AYN00_08230	AYM00_04120	AYM94_08255	AYM02_03975	AYM90_08250	AYM11_03835	AYO24_08250	AYO23_08255	AYM17_01980	AUR58_04440	AYM93_08250	AYO29_08865	AYM38_03935	CBU_1589	hypothetical protein	0	orthologs
1106	AYN00_08260	AYM00_04085	AYM94_08285	AYM02_03945	AYM90_08280	AYM11_03805	AYO24_08280	AYO23_08285	AYM17_01950	AUR58_04400	AYM93_08280	AYO29_08900	AYM38_03905	CBU_1597	hypothetical protein	0	orthologs
1111	AYN00_08360	AYM00_03970	AYM94_08385	AYM02_03840	AYM90_08380	AYM11_03705	AYO24_08380	AYO23_08385	AYM17_01895	AUR58_04280	AYM93_08380	AYO29_08985	AYM38_03795	CBU_1618	hypothetical protein	0	orthologs
1112	AYN00_08375	AYM00_03955	AYM94_08400	AYM02_03825	AYM90_08395	AYM11_03690	AYO24_08395	AYO23_08400	AYM17_01885	AUR58_04265	AYM93_08395	AYO29_08995	AYM38_03780	CBU_1621	hypothetical protein	0	orthologs
1113	AYN00_08380	AYM00_03950	AYM94_08405	AYM02_03820	AYM90_08400	AYM11_03685	AYO24_08400	AYO23_08405	AYM17_01880	AUR58_04260	AYM93_08400	AYO29_09000	AYM38_03775	CBU_1622	type IV secretion protein IcmB	0	orthologs
1114	AYN00_08385	AYM00_03945	AYM94_08410	AYM02_03815	AYM90_08405	AYM11_03680	AYO24_08405	AYO23_08410	AYM17_01875	AUR58_04255	AYM93_08405	AYO29_09005	AYM38_03770	CBU_1623	type IV secretion protein IcmJ	0	orthologs
1115	AYN00_08390	AYM00_03940	AYM94_08415	AYM02_03810	AYM90_08410	AYM11_03675	AYO24_08410	AYO23_08415	AYM17_01870	AUR58_04250	AYM93_08410	AYO29_09010	AYM38_03765	CBU_1624	type IV secretion protein IcmD	0	orthologs
1116	AYN00_08395	AYM00_03935	AYM94_08420	AYM02_03805	AYM90_08415	AYM11_03670	AYO24_08415	AYO23_08420	AYM17_01865	AUR58_04245	AYM93_08415	AYO29_09015	AYM38_03760	CBU_1625	type IV secretion protein IcmC	0	orthologs
1117	AYN00_08400	AYM00_03930	AYM94_08425	AYM02_03800	AYM90_08420	AYM11_03665	AYO24_08420	AYO23_08425	AYM17_01860	AUR58_04240	AYM93_08420	AYO29_09020	AYM38_03755	CBU_1626	type IV secretion protein IcmG	0	orthologs
1119	AYN00_08410	AYM00_03920	AYM94_08435	AYM02_03790	AYM90_08430	AYM11_03655	AYO24_08430	AYO23_08435	AYM17_01850	AUR58_04230	AYM93_08430	AYO29_09030	AYM38_03745	CBU_1628	type IV secretion protein IcmK	0	orthologs
1120	AYN00_08415	AYM00_03915	AYM94_08440	AYM02_03785	AYM90_08435	AYM11_03650	AYO24_08435	AYO23_08440	AYM17_01845	AUR58_04225	AYM93_08435	AYO29_09035	AYM38_03740	CBU_1629	type IV secretion protein IcmL	0	orthologs
1121	AYN00_08420	AYM00_03910	AYM94_08445	AYM02_03780	AYM90_08440	AYM11_03645	AYO24_08440	AYO23_08445	AYM17_01840	AUR58_04220	AYM93_08440	AYO29_09040	AYM38_03735	CBU_1630	type IV secretion protein IcmL	0	orthologs
1123	AYN00_08430	AYM00_03900	AYM94_08455	AYM02_03770	AYM90_08450	AYM11_03635	AYO24_08450	AYO23_08455	AYM17_01830	AUR58_04210	AYM93_08450	AYO29_09050	AYM38_03725	CBU_1632	phosphoesterase	0	orthologs
1124	AYN00_08435	AYM00_03895	AYM94_08460	AYM02_03765	AYM90_08455	AYM11_03630	AYO24_08455	AYO23_08460	AYM17_01825	AUR58_04205	AYM93_08455	AYO29_09055	AYM38_03720	CBU_1633	phosphoesterase	0	orthologs
1125	AYN00_08440	AYM00_03890	AYM94_08465	AYM02_03760	AYM90_08460	AYM11_03625	AYO24_08460	AYO23_08465	AYM17_01820	AUR58_04200	AYM93_08460	AYO29_09060	AYM38_03715	CBU_1634	type IV secretion protein IcmQ	0	orthologs
1126	AYN00_08445	AYM00_03885	AYM94_08470	AYM02_03755	AYM90_08465	AYM11_03620	AYO24_08465	AYO23_08470	AYM17_01815	AUR58_04195	AYM93_08465	AYO29_09065	AYM38_03710	CBU_1634a	hypothetical protein	0	orthologs
1128	AYN00_08470	AYM00_03770	AYM94_08500	AYM02_03650	AYM90_08490	AYM11_03525	AYO24_08490	AYO23_08495	AYM17_01785	AUR58_04075	AYM93_08495	AYO29_09095	AYM38_03615	CBU_1641	phosphoesterase	0	orthologs
1129	AYN00_08475	AYM00_03775	AYM94_08505	AYM02_03655	AYM90_08495	AYM11_03530	AYO24_08495	AYO23_08500	AYM17_01780	AUR58_04080	AYM93_08500	AYO29_09100	AYM38_03620	CBU_1642	type IV secretion protein IcmS	0	orthologs
1130	AYN00_08480	AYM00_03780	AYM94_08510	AYM02_03660	AYM90_08500	AYM11_03535	AYO24_08500	AYO23_08505	AYM17_01775	AUR58_04085	AYM93_08505	AYO29_09105	AYM38_03625	CBU_1643	LuxR family transcriptional regulator	0	orthologs
1131	AYN00_08485	AYM00_03785	AYM94_08515	AYM02_03665	AYM90_08505	AYM11_03540	AYO24_08505	AYO23_08510	AYM17_01770	AUR58_04090	AYM93_08510	AYO29_09110	AYM38_03630	CBU_1644	type IV secretion system protein DotC	0	orthologs
1133	AYN00_08495	AYM00_03795	AYM94_08525	AYM02_03675	AYM90_08515	AYM11_03550	AYO24_08515	AYO23_08520	AYM17_01760	AUR58_04100	AYM93_08520	AYO29_09120	AYM38_03640	CBU_1646	transporter	0	orthologs
1134	AYN00_08500	AYM00_03810	AYM94_08530	AYM02_03685	AYM90_08520	AYM11_03555	AYO24_08560	AYO23_08560	AYM17_01755	AUR58_04115	AYM93_08525	AYO29_09275	AYM38_03650	CBU_1647	hypothetical protein	0	orthologs
1135	AYN00_08505	AYM00_03815	AYM94_08535	AYM02_03690	AYM90_08525	AYM11_03560	AYO24_08555	AYO23_08555	AYM17_01750	AUR58_04120	AYM93_08530	AYO29_09280	AYM38_03655	CBU_1648	type IV secretion protein DotA	0	orthologs
1136	AYN00_08510	AYM00_03820	AYM94_08540	AYM02_03695	AYM90_08530	AYM11_03565	AYO24_08550	AYO23_08550	AYM17_01745	AUR58_04125	AYM93_08535	AYO29_09285	AYM38_03660	CBU_1649	type IV secretion protein IcmV	0	orthologs
1137	AYN00_08515	AYM00_03825	AYM94_08545	AYM02_03700	AYM90_08535	AYM11_03570	AYO24_08545	AYO23_08545	AYM17_01740	AUR58_04130	AYM93_08540	AYO29_09290	AYM38_03665	CBU_1650	phosphoesterase	0	orthologs
1138	AYN00_08520	AYM00_03830	AYM94_08550	AYM02_03705	AYM90_08540	AYM11_03575	AYO24_08540	AYO23_08540	AYM17_01735	AUR58_04135	AYM93_08545	AYO29_09295	AYM38_03670	CBU_1651	hypothetical protein	0	orthologs
1140	AYN00_08530	AYM00_03850	AYM94_08560	AYM02_03725	AYM90_08550	AYM11_03590	AYO24_08525	AYO23_08530	AYM17_01725	AUR58_04155	AYM93_08555	AYO29_00345	AYM38_03680	CBU_1653a	virulence factor	0	orthologs
1144	AYN00_06360	AYM00_03750	AYM94_06235	AYM02_03635	AYM90_06380	AYM11_03505	AYO24_08575	AYO23_08575	AYM17_01705	AUR58_04045	AYM93_06230	AYO29_01710	AYM38_03600	CBU_1659	ligase	0	orthologs
1148	AYN00_06380	AYM00_03730	AYM94_06255	AYM02_03615	AYM90_06400	AYM11_03485	AYO24_08595	AYO23_08595	AYM17_01685	AUR58_04025	AYM93_06250	AYO29_01690	AYM38_03580	CBU_1663	hypothetical protein	0	orthologs
1150	AYN00_06415	AYM00_03695	AYM94_06290	AYM02_03580	AYM90_06435	AYM11_03450	AYO24_08630	AYO23_08630	AYM17_01675	AUR58_03990	AYM93_06285	AYO29_01655	AYM38_03545	CBU_1670	peptidase	0	orthologs
1155	AYN00_06440	AYM00_03670	AYM94_06315	AYM02_03555	AYM90_06460	AYM11_03425	AYO24_08655	AYO23_08655	AYM17_01650	AUR58_03965	AYM93_06310	AYO29_01630	AYM38_03520	CBU_1675a	hypothetical protein	0	orthologs
1156	AYN00_06450	AYM00_03650	AYM94_06325	AYM02_03545	AYM90_06470	AYM11_03415	AYO24_08665	AYO23_08665	AYM17_01640	AUR58_03945	AYM93_06320	AYO29_01620	AYM38_03505	CBU_1677	hemerythrin	0	orthologs
1158	AYN00_06470	AYM00_03630	AYM94_06345	AYM02_03525	AYM90_06490	AYM11_03395	AYO24_08685	AYO23_08685	AYM17_01625	AUR58_03925	AYM93_06340	AYO29_01605	AYM38_03485	CBU_1681	hypothetical protein	0	orthologs
1160	AYN00_06480	AYM00_03620	AYM94_06355	AYM02_03515	AYM90_06500	AYM11_03385	AYO24_08695	AYO23_08695	AYM17_01615	AUR58_03915	AYM93_06350	AYO29_01595	AYM38_03475	CBU_1683	hypothetical protein	0	orthologs
1161	AYN00_06485	AYM00_03615	AYM94_06360	AYM02_03510	AYM90_06505	AYM11_03380	AYO24_08700	AYO23_08700	AYM17_01610	AUR58_03910	AYM93_06355	AYO29_01590	AYM38_03470	CBU_1684	hypothetical protein	0	orthologs
1162	AYN00_06495	AYM00_03605	AYM94_06370	AYM02_03500	AYM90_06515	AYM11_03370	AYO24_08710	AYO23_08710	AYM17_01600	AUR58_03900	AYM93_06365	AYO29_01580	AYM38_03460	CBU_1686	hypothetical protein	0	orthologs
1165	AYN00_06530	AYM00_03565	AYM94_06405	AYM02_03460	AYM90_06550	AYM11_03330	AYO24_08745	AYO23_08745	AYM17_01570	AUR58_03860	AYM93_06400	AYO29_01550	AYM38_03420	CBU_1691	DNA-binding protein	0	orthologs
1166	AYN00_06540	AYM00_03555	AYM94_06415	AYM02_03450	AYM90_06560	AYM11_03320	AYO24_08755	AYO23_08755	AYM17_01560	AUR58_03850	AYM93_06410	AYO29_01540	AYM38_03410	CBU_1692a	hypothetical protein	0	orthologs
1171	AYN00_06575	AYM00_03520	AYM94_06450	AYM02_03415	AYM90_06595	AYM11_03285	AYO24_08790	AYO23_08790	AYM17_01525	AUR58_03815	AYM93_06445	AYO29_01505	AYM38_03375	CBU_1699	hypothetical protein	0	orthologs
1172	AYN00_06585	AYM00_03505	AYM94_06460	AYM02_03400	AYM90_06605	AYM11_03275	AYO24_08800	AYO23_08800	AYM17_00260	AUR58_03795	AYM93_06455	AYO29_01495	AYM38_03360	CBU_1702	hypothetical protein	0	orthologs
1174	AYN00_06600	AYM00_03490	AYM94_06475	AYM02_03385	AYM90_06620	AYM11_03260	AYO24_08815	AYO23_08815	AYM17_00275	AUR58_03780	AYM93_06470	AYO29_01480	AYM38_03345	CBU_1705	hypothetical protein	0	orthologs
1176	AYN00_06610	AYM00_03480	AYM94_06485	AYM02_03375	AYM90_06630	AYM11_03250	AYO24_08825	AYO23_08825	AYM17_00285	AUR58_03770	AYM93_06480	AYO29_01470	AYM38_03335	CBU_1707	hypothetical protein	0	orthologs
1179	AYN00_06630	AYM00_03460	AYM94_06505	AYM02_03355	AYM90_06650	AYM11_03230	AYO24_08845	AYO23_08845	AYM17_00410	AUR58_03750	AYM93_06500	AYO29_01450	AYM38_03315	CBU_1711	hypothetical protein	0	orthologs
1187	AYN00_08555	AYM00_03405	AYM94_08590	AYM02_03300	AYM90_08575	AYM11_03185	AYO24_08890	AYO23_08890	AYM17_00455	AUR58_03695	AYM93_08585	AYO29_01395	AYM38_03265	CBU_1721	hypothetical protein	0	orthologs
1195	AYN00_08630	AYM00_03320	AYM94_08665	AYM02_03225	AYM90_08650	AYM11_03110	AYO24_08960	AYO23_08960	AYM17_00535	AUR58_03610	AYM93_08660	AYO29_01320	AYM38_03185	CBU_1734	DnaA regulatory inactivator Hda	0	orthologs
1201	AYN00_08665	AYM00_03290	AYM94_08700	AYM02_03195	AYM90_08685	AYM11_03080	AYO24_08995	AYO23_08995	AYM17_00570	AUR58_03580	AYM93_08695	AYO29_01290	AYM38_03155	CBU_1741	hypothetical protein	0	orthologs
1209	AYN00_08715	AYM00_03240	AYM94_08750	AYM02_03145	AYM90_08735	AYM11_03030	AYO24_09045	AYO23_09045	AYM17_00620	AUR58_03530	AYM93_08745	AYO29_01240	AYM38_03105	CBU_1751	hypothetical protein	0	orthologs
1210	AYN00_08720	AYM00_03235	AYM94_08755	AYM02_03140	AYM90_08740	AYM11_03025	AYO24_09050	AYO23_09050	AYM17_00625	AUR58_03525	AYM93_08750	AYO29_01235	AYM38_03100	CBU_1752	hypothetical protein	0	orthologs
1211	AYN00_08730	AYM00_03225	AYM94_08765	AYM02_03130	AYM90_08750	AYM11_03015	AYO24_09060	AYO23_09060	AYM17_00635	AUR58_03515	AYM93_08760	AYO29_01225	AYM38_03090	CBU_1754	hypothetical protein	0	orthologs
1212	AYN00_08735	AYM00_03220	AYM94_08770	AYM02_03125	AYM90_08755	AYM11_03010	AYO24_09065	AYO23_09065	AYM17_00640	AUR58_03510	AYM93_08765	AYO29_01220	AYM38_03085	CBU_1755	hypothetical protein	0	orthologs
1214	AYN00_08800	AYM00_03185	AYM94_08800	AYM02_03095	AYM90_08815	AYM11_02985	AYO24_09095	AYO23_09095	AYM17_00665	AUR58_03475	AYM93_08795	AYO29_01200	AYM38_03055	CBU_1762	FAD-dependent oxidoreductase	0	orthologs
1215	AYN00_08810	AYM00_03175	AYM94_08810	AYM02_03085	AYM90_08825	AYM11_02975	AYO24_09105	AYO23_09105	AYM17_00675	AUR58_03465	AYM93_08805	AYO29_01190	AYM38_03045	CBU_1764	hypothetical protein	0	orthologs
1216	AYN00_08815	AYM00_03170	AYM94_08815	AYM02_03080	AYM90_08830	AYM11_02970	AYO24_09110	AYO23_09110	AYM17_00680	AUR58_03460	AYM93_08810	AYO29_01185	AYM38_03040	CBU_1764a	hypothetical protein	0	orthologs
1217	AYN00_08820	AYM00_03160	AYM94_08820	AYM02_03070	AYM90_08835	AYM11_02965	AYO24_09115	AYO23_09115	AYM17_00685	AUR58_03445	AYM93_08815	AYO29_01170	AYM38_03035	CBU_1765	hypothetical protein	0	orthologs
1240	AYN00_09015	AYM00_02905	AYM94_09045	AYM02_02825	AYM90_09030	AYM11_02735	AYO24_09340	AYO23_09340	AYM17_00855	AUR58_03180	AYM93_09040	AYO29_00410	AYM38_02795	CBU_1813	hypothetical protein	0	orthologs
1244	AYN00_09050	AYM00_02860	AYM94_09080	AYM02_02790	AYM90_09065	AYM11_02700	AYO24_09375	AYO23_09375	AYM17_00890	AUR58_03135	AYM93_09075	AYO29_00445	AYM38_02760	CBU_1820	hypothetical protein	0	orthologs
1245	AYN00_09055	AYM00_02855	AYM94_09085	AYM02_02785	AYM90_09070	AYM11_02695	AYO24_09380	AYO23_09380	AYM17_00895	AUR58_03130	AYM93_09080	AYO29_00450	AYM38_02755	CBU_1821	hypothetical protein	0	orthologs
1247	AYN00_09075	AYM00_02835	AYM94_09105	AYM02_02765	AYM90_09090	AYM11_02675	AYO24_09400	AYO23_09400	AYM17_00915	AUR58_03110	AYM93_09100	AYO29_00470	AYM38_02735	CBU_1825	hypothetical protein	0	orthologs
1253	AYN00_09110	AYM00_02800	AYM94_09140	AYM02_02730	AYM90_09125	AYM11_02640	AYO24_09435	AYO23_09435	AYM17_00950	AUR58_03075	AYM93_09135	AYO29_00505	AYM38_02700	CBU_1831	dolichyl-phosphate-mannose--protein mannosyltransferase	0	orthologs
1254	AYN00_09115	AYM00_02795	AYM94_09145	AYM02_02725	AYM90_09130	AYM11_02635	AYO24_09440	AYO23_09440	AYM17_00955	AUR58_03070	AYM93_09140	AYO29_00510	AYM38_02695	CBU_1831a	hypothetical protein	0	orthologs
1255	AYN00_09120	AYM00_02790	AYM94_09150	AYM02_02720	AYM90_09135	AYM11_02630	AYO24_09445	AYO23_09445	AYM17_00960	AUR58_03065	AYM93_09145	AYO29_00515	AYM38_02690	CBU_1833	hypothetical protein	0	orthologs
1265	AYN00_09170	AYM00_02735	AYM94_09200	AYM02_02665	AYM90_09185	AYM11_02580	AYO24_09495	AYO23_09495	AYM17_01010	AUR58_03005	AYM93_09195	AYO29_00565	AYM38_02640	CBU_1843	hypothetical protein	0	orthologs
1266	AYN00_09180	AYM00_02710	AYM94_09210	AYM02_02650	AYM90_09195	AYM11_02565	AYO24_09505	AYO23_09505	AYM17_01020	AUR58_02985	AYM93_09205	AYO29_00575	AYM38_02620	CBU_1843a	hypothetical protein	0	orthologs
1267	AYN00_09185	AYM00_02705	AYM94_09215	AYM02_02645	AYM90_09200	AYM11_02560	AYO24_09510	AYO23_09510	AYM17_01025	AUR58_02980	AYM93_09210	AYO29_00580	AYM38_02615	CBU_1845	hypothetical protein	0	orthologs
1268	AYN00_09195	AYM00_02695	AYM94_09225	AYM02_02635	AYM90_09210	AYM11_02550	AYO24_09520	AYO23_09520	AYM17_01035	AUR58_02970	AYM93_09220	AYO29_00590	AYM38_02605	CBU_1847	hypothetical protein	0	orthologs
1269	AYN00_09210	AYM00_02680	AYM94_09240	AYM02_02620	AYM90_09225	AYM11_02535	AYO24_09535	AYO23_09535	AYM17_01050	AUR58_02955	AYM93_09235	AYO29_00605	AYM38_02590	CBU_1847b	hypothetical protein	0	orthologs
1270	AYN00_09220	AYM00_02670	AYM94_09250	AYM02_02610	AYM90_09235	AYM11_02525	AYO24_09540	AYO23_09540	AYM17_01060	AUR58_02945	AYM93_09245	AYO29_00615	AYM38_02580	CBU_1850	hypothetical protein	0	orthologs
1271	AYN00_09225	AYM00_02665	AYM94_09255	AYM02_02605	AYM90_09240	AYM11_02520	AYO24_09545	AYO23_09545	AYM17_01065	AUR58_02940	AYM93_09250	AYO29_00620	AYM38_02575	CBU_1851	hypothetical protein	0	orthologs
1272	AYN00_09230	AYM00_02660	AYM94_09260	AYM02_02600	AYM90_09245	AYM11_02515	AYO24_09550	AYO23_09550	AYM17_01070	AUR58_02935	AYM93_09255	AYO29_00625	AYM38_02570	CBU_1852	dolichyl-phosphate-mannose--protein mannosyltransferase	0	orthologs
1273	AYN00_09235	AYM00_02655	AYM94_09265	AYM02_02595	AYM90_09250	AYM11_02510	AYO24_09555	AYO23_09555	AYM17_01075	AUR58_02930	AYM93_09260	AYO29_00630	AYM38_02565	CBU_1853	sugar translocase	0	orthologs
1274	AYN00_09245	AYM00_02645	AYM94_09275	AYM02_02585	AYM90_09260	AYM11_02500	AYO24_09565	AYO23_09565	AYM17_01085	AUR58_02920	AYM93_09270	AYO29_00640	AYM38_02555	CBU_1855	fimbrial protein	0	orthologs
1277	AYN00_09280	AYM00_02610	AYM94_09310	AYM02_02550	AYM90_09295	AYM11_02465	AYO24_09600	AYO23_09600	AYM17_01120	AUR58_02885	AYM93_09305	AYO29_00675	AYM38_02520	CBU_1863	hypothetical protein	0	orthologs
1278	AYN00_09285	AYM00_02605	AYM94_09315	AYM02_02545	AYM90_09300	AYM11_02460	AYO24_09605	AYO23_09605	AYM17_01125	AUR58_02880	AYM93_09310	AYO29_00680	AYM38_02515	CBU_1864	hypothetical protein	0	orthologs
1279	AYN00_09290	AYM00_02600	AYM94_09320	AYM02_02540	AYM90_09305	AYM11_02455	AYO24_09610	AYO23_09610	AYM17_01130	AUR58_02875	AYM93_09315	AYO29_00685	AYM38_02510	CBU_1865	hypothetical protein	0	orthologs
1281	AYN00_09300	AYM00_02590	AYM94_09330	AYM02_02530	AYM90_09315	AYM11_02445	AYO24_09620	AYO23_09620	AYM17_01140	AUR58_02865	AYM93_09325	AYO29_00695	AYM38_02500	CBU_1867	hypothetical protein	0	orthologs
1282	AYN00_09305	AYM00_02585	AYM94_09335	AYM02_02525	AYM90_09320	AYM11_02440	AYO24_09625	AYO23_09625	AYM17_01150	AUR58_02860	AYM93_09330	AYO29_00705	AYM38_02495	CBU_1869	hypothetical protein	0	orthologs
1287	AYN00_09335	AYM00_02555	AYM94_09360	AYM02_02495	AYM90_09350	AYM11_02410	AYO24_09655	AYO23_09650	AYM17_01180	AUR58_02835	AYM93_09355	AYO29_00730	AYM38_02465	CBU_1874	glutamate--cysteine ligase	0	orthologs
1289	AYN00_09345	AYM00_02540	AYM94_09370	AYM02_02480	AYM90_09360	AYM11_02395	AYO24_09670	AYO23_09660	AYM17_01190	AUR58_02820	AYM93_09365	AYO29_00740	AYM38_02450	CBU_1876	SAM-dependent methyltransferase	0	orthologs
1299	AYN00_09400	AYM00_02485	AYM94_09425	AYM02_02425	AYM90_09415	AYM11_02340	AYO24_09725	AYO23_09715	AYM17_01245	AUR58_02765	AYM93_09420	AYO29_00795	AYM38_02395	CBU_1888	pilus assembly protein PilM	0	orthologs
1302	AYN00_09430	AYM00_02455	AYM94_09455	AYM02_02395	AYM90_09445	AYM11_02310	AYO24_09755	AYO23_09745	AYM17_01275	AUR58_02735	AYM93_09450	AYO29_00820	AYM38_02365	CBU_1894	hypothetical protein	0	orthologs
1310	AYN00_10035	AYM00_02410	AYM94_09565	AYM02_02350	AYM90_09555	AYM11_02265	AYO24_09800	AYO23_09790	AYM17_00045	AUR58_02685	AYM93_10050	AYO29_00040	AYM38_02320	CBU_1906	hypothetical protein	0	orthologs
1311	AYN00_10045	AYM00_02400	AYM94_09575	AYM02_02340	AYM90_09565	AYM11_02255	AYO24_09810	AYO23_09800	AYM17_00055	AUR58_02675	AYM93_10060	AYO29_00050	AYM38_02310	CBU_1908	hypothetical protein	0	orthologs
1314	AYN00_10060	AYM00_02385	AYM94_09590	AYM02_02325	AYM90_09580	AYM11_02240	AYO24_09825	AYO23_09815	AYM17_00070	AUR58_02660	AYM93_10075	AYO29_00065	AYM38_02295	CBU_1911	hypothetical protein	0	orthologs
1318	AYN00_10085	AYM00_02360	AYM94_09615	AYM02_02300	AYM90_09605	AYM11_02215	AYO24_09850	AYO23_09840	AYM17_00095	AUR58_02635	AYM93_10100	AYO29_00095	AYM38_02270	CBU_1917	50S ribosomal protein L34	0	orthologs
1321	AYN00_10100	AYM00_02335	AYM94_09630	AYM02_02280	AYM90_09620	AYM11_02200	AYO24_09865	AYO23_09855	AYM17_00110	AUR58_02605	AYM93_10115	AYO29_00110	AYM38_02250	CBU_1921	hypothetical protein	0	orthologs
1329	AYN00_10140	AYM00_02295	AYM94_09670	AYM02_02240	AYM90_09660	AYM11_02160	AYO24_09905	AYO23_09895	AYM17_00155	AUR58_02565	AYM93_10155	AYO29_00155	AYM38_02210	CBU_1930	hypothetical protein	0	orthologs
1330	AYN00_10145	AYM00_02290	AYM94_09675	AYM02_02235	AYM90_09665	AYM11_02155	AYO24_09910	AYO23_09900	AYM17_00160	AUR58_02560	AYM93_10160	AYO29_00160	AYM38_02205	CBU_1930a	hypothetical protein	0	orthologs
1331	AYN00_10150	AYM00_02285	AYM94_09680	AYM02_02230	AYM90_09670	AYM11_02150	AYO24_09915	AYO23_09905	AYM17_00165	AUR58_02555	AYM93_10165	AYO29_00165	AYM38_02200	CBU_1931	hypothetical protein	0	orthologs
1332	AYN00_10155	AYM00_02280	AYM94_09685	AYM02_02225	AYM90_09675	AYM11_02145	AYO24_09920	AYO23_09910	AYM17_00170	AUR58_02550	AYM93_10170	AYO29_00170	AYM38_02195	CBU_1932	hypothetical protein	0	orthologs
1335	AYN00_08185	AYM00_04165	AYM94_08210	AYM02_04020	AYM90_08205	AYM11_03880	AYO24_08205	AYO23_08210	AYM17_01280	AUR58_04485	AYM93_08205	AYO29_08820	AYM38_03980	CBU_1934a	hypothetical protein	0	orthologs
1338	AYN00_10205	AYM00_02235	AYM94_09735	AYM02_02180	AYM90_09725	AYM11_02100	AYO24_09970	AYO23_09960	AYM17_00215	AUR58_02505	AYM93_10220	AYO29_00220	AYM38_02150	CBU_1940	ATP F0F1 synthase subunit C	0	orthologs
1346	AYN00_10250	AYM00_02190	AYM94_09780	AYM02_02135	AYM90_09770	AYM11_02055	AYO24_10015	AYO23_10005	AYM17_01515	AUR58_02460	AYM93_10265	AYO29_00270	AYM38_02105	CBU_1950	hypothetical protein	0	orthologs
1347	AYN00_10255	AYM00_02185	AYM94_09785	AYM02_02130	AYM90_09775	AYM11_02050	AYO24_10020	AYO23_10010	AYM17_01510	AUR58_02455	AYM93_10270	AYO29_00275	AYM38_02100	CBU_1951	hypothetical protein	0	orthologs
1351	AYN00_10275	AYM00_02160	AYM94_09805	AYM02_02105	AYM90_09795	AYM11_02025	AYO24_10040	AYO23_10030	AYM17_01485	AUR58_02430	AYM93_10290	AYO29_00300	AYM38_02075	CBU_1956	pyridine nucleotide transhydrogenase	0	orthologs
1359	AYN00_10335	AYM00_01270	AYM94_09865	AYM02_01250	AYM90_09855	AYM11_01210	AYO24_00515	AYO23_00520	AYM17_09740	AUR58_01535	AYM93_10350	AYO29_09840	AYM38_01225	CBU_1971	hypothetical protein	0	orthologs
1360	AYN00_10340	AYM00_01275	AYM94_09870	AYM02_01255	AYM90_09860	AYM11_01215	AYO24_00510	AYO23_00515	AYM17_09745	AUR58_01540	AYM93_10355	AYO29_09845	AYM38_01230	CBU_1972	LuxR family transcriptional regulator	0	orthologs
1361	AYN00_10345	AYM00_01280	AYM94_09875	AYM02_01260	AYM90_09865	AYM11_01220	AYO24_00505	AYO23_00510	AYM17_09750	AUR58_01545	AYM93_10360	AYO29_09850	AYM38_01235	CBU_1973	hypothetical protein	0	orthologs
1362	AYN00_10350	AYM00_01285	AYM94_09880	AYM02_01265	AYM90_09870	AYM11_01225	AYO24_00500	AYO23_00505	AYM17_09755	AUR58_01550	AYM93_10365	AYO29_09855	AYM38_01240	CBU_1974	hypothetical protein	0	orthologs
1371	AYN00_10395	AYM00_01330	AYM94_09925	AYM02_01310	AYM90_09915	AYM11_01270	AYO24_00455	AYO23_00460	AYM17_09800	AUR58_01595	AYM93_10410	AYO29_09900	AYM38_01285	CBU_1984	hypothetical protein	0	orthologs
1372	AYN00_10400	AYM00_01335	AYM94_09930	AYM02_01315	AYM90_09920	AYM11_01275	AYO24_00450	AYO23_00455	AYM17_09805	AUR58_01600	AYM93_10415	AYO29_09905	AYM38_01290	CBU_1985	hypothetical protein	0	orthologs
1374	AYN00_10410	AYM00_01345	AYM94_09940	AYM02_01325	AYM90_09930	AYM11_01285	AYO24_00440	AYO23_00445	AYM17_09815	AUR58_01610	AYM93_10425	AYO29_09915	AYM38_01300	CBU_1987	bis(5'-nucleosyl)-tetraphosphatase (symmetrical)	0	orthologs
1383	AYN00_09505	AYM00_01410	AYM94_09520	AYM02_01395	AYM90_09510	AYM11_01345	AYO24_00390	AYO23_00395	AYM17_09875	AUR58_01680	AYM93_09515	AYO29_09980	AYM38_01365	CBU_2001	hypothetical protein	0	orthologs
1386	AYN00_09520	AYM00_01425	AYM94_09950	AYM02_01410	AYM90_09940	AYM11_01360	AYO24_00375	AYO23_00380	AYM17_09890	AUR58_01695	AYM93_09530	AYO29_09995	AYM38_01380	CBU_2003a	hypothetical protein	0	orthologs
1389	AYN00_09540	AYM00_01445	AYM94_09970	AYM02_01430	AYM90_09960	AYM11_01380	AYO24_00355	AYO23_00360	AYM17_09910	AUR58_01715	AYM93_09550	AYO29_10015	AYM38_01400	CBU_2007	hypothetical protein	0	orthologs
1392	AYN00_09555	AYM00_01460	AYM94_09985	AYM02_01445	AYM90_09975	AYM11_01395	AYO24_00340	AYO23_00345	AYM17_09925	AUR58_01730	AYM93_09565	AYO29_10030	AYM38_01415	CBU_2010	hypothetical protein	0	orthologs
1395	AYN00_09570	AYM00_01475	AYM94_10000	AYM02_01460	AYM90_09990	AYM11_01410	AYO24_00325	AYO23_00330	AYM17_09940	AUR58_01745	AYM93_09580	AYO29_10045	AYM38_01430	CBU_2013	hypothetical protein	0	orthologs
1396	AYN00_09575	AYM00_01485	AYM94_10010	AYM02_01465	AYM90_09995	AYM11_01415	AYO24_00320	AYO23_00320	AYM17_09945	AUR58_01750	AYM93_09590	AYO29_10050	AYM38_01435	CBU_2014	hypothetical protein	0	orthologs
1397	AYN00_09585	AYM00_01495	AYM94_10020	AYM02_01475	AYM90_10005	AYM11_01425	AYO24_00310	AYO23_00310	AYM17_09955	AUR58_01760	AYM93_09600	AYO29_10060	AYM38_01445	CBU_2016	hypothetical protein	0	orthologs
1405	AYN00_09640	AYM00_01555	AYM94_10075	AYM02_01530	AYM90_10060	AYM11_01480	AYO24_00260	AYO23_00260	AYM17_10005	AUR58_01825	AYM93_09655	AYO29_10115	AYM38_01505	CBU_2027	hypothetical protein	0	orthologs
1406	AYN00_09650	AYM00_01565	AYM94_10085	AYM02_01540	AYM90_10070	AYM11_01490	AYO24_00250	AYO23_00250	AYM17_10015	AUR58_01835	AYM93_09665	AYO29_10125	AYM38_01515	CBU_2029	hypothetical protein	0	orthologs
1409	AYN00_09665	AYM00_01580	AYM94_10100	AYM02_01555	AYM90_10085	AYM11_01505	AYO24_00235	AYO23_00235	AYM17_10030	AUR58_01850	AYM93_09680	AYO29_10140	AYM38_01530	CBU_2032	diguanylate cyclase	0	orthologs
1410	AYN00_09680	AYM00_01595	AYM94_10115	AYM02_01570	AYM90_10100	AYM11_01520	AYO24_00220	AYO23_00220	AYM17_10040	AUR58_01865	AYM93_09695	AYO29_10150	AYM38_01545	CBU_2036	hypothetical protein	0	orthologs
1414	AYN00_09765	AYM00_01680	AYM94_10200	AYM02_01655	AYM90_10185	AYM11_01605	AYO24_00135	AYO23_00135	AYM17_10110	AUR58_01950	AYM93_09780	AYO29_10225	AYM38_01630	CBU_2051a	hypothetical protein	0	orthologs
1417	AYN00_09790	AYM00_01705	AYM94_10225	AYM02_01680	AYM90_10210	AYM11_01630	AYO24_00110	AYO23_00110	AYM17_10135	AUR58_01975	AYM93_09805	AYO29_10250	AYM38_01655	CBU_2057	hypothetical protein	0	orthologs
1419	AYN00_09810	AYM00_01725	AYM94_10245	AYM02_01700	AYM90_10230	AYM11_01650	AYO24_00090	AYO23_00090	AYM17_10155	AUR58_01995	AYM93_09825	AYO29_10265	AYM38_01675	CBU_2061	hypothetical protein	0	orthologs
1424	AYN00_09855	AYM00_01770	AYM94_10290	AYM02_01745	AYM90_10275	AYM11_01695	AYO24_00045	AYO23_00045	AYM17_10200	AUR58_02040	AYM93_09870	AYO29_10305	AYM38_01720	CBU_2071	hypothetical protein	0	orthologs
1425	AYN00_09860	AYM00_01785	AYM94_10295	AYM02_01755	AYM90_10280	AYM11_01700	AYO24_00040	AYO23_00040	AYM17_10205	AUR58_02055	AYM93_09875	AYO29_10315	AYM38_01730	CBU_2072	hypothetical protein	0	orthologs
1432	AYN00_09895	AYM00_01825	AYM94_10330	AYM02_01790	AYM90_10315	AYM11_01735	AYO24_10270	AYO23_10260	AYM17_10240	AUR58_02100	AYM93_09910	AYO29_10350	AYM38_01765	CBU_2079	hypothetical protein	0	orthologs
1438	AYN00_09935	AYM00_01865	AYM94_10370	AYM02_01825	AYM90_10355	AYM11_01765	AYO24_10285	AYO23_10275	AYM17_10280	AUR58_02140	AYM93_09950	AYO29_10395	AYM38_01800	CBU_2087	thioredoxin	0	orthologs
1440	AYN00_09945	AYM00_01875	AYM94_10380	AYM02_01835	AYM90_10365	AYM11_01775	AYO24_10295	AYO23_10285	AYM17_10290	AUR58_02150	AYM93_09960	AYO29_10405	AYM38_01810	CBU_2089	hypothetical protein	0	orthologs
1447	AYN00_09980	AYM00_01920	AYM94_10415	AYM02_01880	AYM90_10400	AYM11_01810	AYO24_10330	AYO23_10320	AYM17_10325	AUR58_02195	AYM93_09995	AYO29_10440	AYM38_01845	CBU_2095a	hypothetical protein	0	orthologs
852	AYN00_05560	AYM00_06295	AYM94_05580	AYM02_06040	AYM90_05655	AYM11_05840	AYO24_06490	AYO23_06500	AYM17_03705	AUR58_06700	AYM93_05575	AYO29_05520	AYM38_05970	CBU_1235	oligoribonuclease	A	orthologs
337	AYN00_02280	AYM00_10365	AYM94_02270	AYM02_09990	AYM90_02295	AYM11_09685	AYO24_02615	AYO23_02620	AYM17_07595	AUR58_10870	AYM93_02265	AYO29_06945	AYM38_09855	CBU_0461	pyruvate dehydrogenase	C	orthologs
338	AYN00_02285	AYM00_10360	AYM94_02275	AYM02_09985	AYM90_02300	AYM11_09680	AYO24_02620	AYO23_02625	AYM17_07590	AUR58_10865	AYM93_02270	AYO29_06940	AYM38_09850	CBU_0462	branched-chain alpha-keto acid dehydrogenase subunit E2	C	orthologs
339	AYN00_02290	AYM00_10355	AYM94_02280	AYM02_09980	AYM90_02305	AYM11_09675	AYO24_02625	AYO23_02630	AYM17_07585	AUR58_10860	AYM93_02275	AYO29_06935	AYM38_09845	CBU_0463	dihydrolipoamide dehydrogenase	C	orthologs
434	AYN00_02880	AYM00_09655	AYM94_02875	AYM02_09275	AYM90_02895	AYM11_09000	AYO24_03215	AYO23_03225	AYM17_06945	AUR58_10135	AYM93_02865	AYO29_06295	AYM38_09160	CBU_0581	ferredoxin	C	orthologs
441	AYN00_02920	AYM00_09695	AYM94_02915	AYM02_09315	AYM90_02935	AYM11_09040	AYO24_03255	AYO23_03265	AYM17_06905	AUR58_10175	AYM93_02905	AYO29_06255	AYM38_09200	CBU_0589	ferredoxin	C	orthologs
465	AYN00_03110	AYM00_06610	AYM94_03105	AYM02_06325	AYM90_03125	AYM11_06120	AYO24_03445	AYO23_03455	AYM17_06735	AUR58_07020	AYM93_03095	AYO29_07930	AYM38_06260	CBU_0628	inorganic pyrophosphatase	C	orthologs
466	AYN00_03115	AYM00_06625	AYM94_03110	AYM02_06335	AYM90_03130	AYM11_06125	AYO24_03450	AYO23_03460	AYM17_06730	AUR58_07035	AYM93_03100	AYO29_07925	AYM38_06270	CBU_0629	integrase	C	orthologs
473	AYN00_03155	AYM00_06665	AYM94_03150	AYM02_06375	AYM90_03170	AYM11_06165	AYO24_03490	AYO23_03500	AYM17_06690	AUR58_07075	AYM93_03140	AYO29_07885	AYM38_06310	CBU_0638	branched-chain alpha-keto acid dehydrogenase subunit E2	C	orthologs
474	AYN00_03160	AYM00_06670	AYM94_03155	AYM02_06380	AYM90_03175	AYM11_06170	AYO24_03495	AYO23_03505	AYM17_06685	AUR58_07080	AYM93_03145	AYO29_07880	AYM38_06315	CBU_0639	2-oxoisovalerate dehydrogenase	C	orthologs
475	AYN00_03165	AYM00_06675	AYM94_03160	AYM02_06385	AYM90_03180	AYM11_06175	AYO24_03500	AYO23_03510	AYM17_06680	AUR58_07085	AYM93_03150	AYO29_07875	AYM38_06320	CBU_0640	pyruvate dehydrogenase (acetyl-transferring) E1 component subunit alpha	C	orthologs
477	AYN00_03175	AYM00_06685	AYM94_03170	AYM02_06395	AYM90_03190	AYM11_06185	AYO24_03510	AYO23_03520	AYM17_06670	AUR58_07095	AYM93_03160	AYO29_07865	AYM38_06330	CBU_0642	glycerophosphoryl diester phosphodiesterase	C	orthologs
503	AYN00_03445	AYM00_06955	AYM94_03445	AYM02_06660	AYM90_03460	AYM11_06445	AYO24_03780	AYO23_03790	AYM17_06410	AUR58_07365	AYM93_03435	AYO29_07610	AYM38_06565	CBU_0692	acetoin dehydrogenase	C	orthologs
504	AYN00_03450	AYM00_06960	AYM94_03450	AYM02_06665	AYM90_03465	AYM11_06450	AYO24_03785	AYO23_03795	AYM17_06405	AUR58_07370	AYM93_03440	AYO29_07605	AYM38_06570	CBU_0693	acetoin dehydrogenase	C	orthologs
558	AYN00_03865	AYM00_07340	AYM94_03865	AYM02_07040	AYM90_03880	AYM11_06820	AYO24_05535	AYO23_05550	AYM17_05995	AUR58_07775	AYM93_03855	AYO29_02010	AYM38_06940	CBU_0772	2-methylcitrate synthase	C	orthologs
566	AYN00_03930	AYM00_07405	AYM94_03930	AYM02_07105	AYM90_03945	AYM11_06885	AYO24_05470	AYO23_05485	AYM17_05925	AUR58_07840	AYM93_03920	AYO29_02075	AYM38_07005	CBU_0786	CoA-transferase	C	orthologs
588	AYN00_04120	AYM00_07600	AYM94_04120	AYM02_07295	AYM90_04135	AYM11_07075	AYO24_05275	AYO23_05290	AYM17_05730	AUR58_08040	AYM93_04110	AYO29_02245	AYM38_07195	CBU_0823	NAD-dependent malic enzyme	C	orthologs
690	AYN00_04865	AYM00_08340	AYM94_04865	AYM02_08030	AYM90_04885	AYM11_07805	AYO24_04530	AYO23_04545	AYM17_05005	AUR58_08775	AYM93_04855	AYO29_04330	AYM38_07930	CBU_0965	cytochrome d terminal oxidase subunit 1	C	orthologs
691	AYN00_04870	AYM00_08345	AYM94_04870	AYM02_08035	AYM90_04890	AYM11_07810	AYO24_04525	AYO23_04540	AYM17_05000	AUR58_08780	AYM93_04860	AYO29_04325	AYM38_07935	CBU_0966	cytochrome d ubiquinol oxidase subunit 2	C	orthologs
732	AYN00_05210	AYM00_08725	AYM94_05215	AYM02_08405	AYM90_05230	AYM11_08170	AYO24_04190	AYO23_04205	AYM17_04630	AUR58_09165	AYM93_05205	AYO29_03980	AYM38_08300	CBU_1035d	cytochrome O ubiquinol oxidase	C	orthologs
733	AYN00_05215	AYM00_08730	AYM94_05220	AYM02_08410	AYM90_05235	AYM11_08175	AYO24_04185	AYO23_04200	AYM17_04625	AUR58_09170	AYM93_05210	AYO29_03975	AYM38_08305	CBU_1038	cytochrome o ubiquinol oxidase subunit III	C	orthologs
734	AYN00_05220	AYM00_08735	AYM94_05225	AYM02_08415	AYM90_05240	AYM11_08180	AYO24_04180	AYO23_04195	AYM17_04620	AUR58_09175	AYM93_05215	AYO29_03970	AYM38_08310	CBU_1039	cytochrome ubiquinol oxidase subunit I	C	orthologs
735	AYN00_05225	AYM00_08740	AYM94_05230	AYM02_08420	AYM90_05245	AYM11_08185	AYO24_04175	AYO23_04190	AYM17_04615	AUR58_09180	AYM93_05220	AYO29_03965	AYM38_08315	CBU_1040	cytochrome ubiquinol oxidase subunit II	C	orthologs
772	AYN00_05765	AYM00_09095	AYM94_05785	AYM02_08755	AYM90_05525	AYM11_08505	AYO24_05835	AYO23_05850	AYM17_04340	AUR58_09540	AYM93_05780	AYO29_04855	AYM38_08645	CBU_1096	class II fumarate hydratase	C	orthologs
779	AYN00_05850	AYM00_09150	AYM94_05870	AYM02_08805	AYM90_05870	AYM11_08550	AYO24_05925	AYO23_05940	AYM17_04275	AUR58_09605	AYM93_05865	AYO29_04950	AYM38_08690	CBU_1117	electron transfer flavoprotein subunit beta	C	orthologs
780	AYN00_05855	AYM00_09155	AYM94_05875	AYM02_08810	AYM90_05875	AYM11_08555	AYO24_05930	AYO23_05945	AYM17_04270	AUR58_09610	AYM93_05870	AYO29_04955	AYM38_08695	CBU_1118	electron transfer flavoprotein subunit beta	C	orthologs
782	AYN00_05865	AYM00_09165	AYM94_05885	AYM02_08820	AYM90_05885	AYM11_08565	AYO24_05940	AYO23_05955	AYM17_04260	AUR58_09620	AYM93_05880	AYO29_04965	AYM38_08705	CBU_1120	electron transfer flavoprotein-ubiquinone oxidoreductase	C	orthologs
831	AYN00_06270	AYM00_06490	AYM94_06600	AYM02_06210	AYM90_06290	AYM11_06010	AYO24_06345	AYO23_06360	AYM17_03870	AUR58_06900	AYM93_06595	AYO29_05370	AYM38_06140	CBU_1200	isocitrate dehydrogenase (NADP(+))	C	orthologs
858	AYN00_05590	AYM00_06265	AYM94_05610	AYM02_06010	AYM90_05685	AYM11_05810	AYO24_06520	AYO23_06530	AYM17_03675	AUR58_06670	AYM93_05605	AYO29_05550	AYM38_05940	CBU_1241	malate dehydrogenase	C	orthologs
941	AYN00_07105	AYM00_05620	AYM94_07125	AYM02_05390	AYM90_07125	AYM11_05210	AYO24_07100	AYO23_07115	AYM17_03095	AUR58_06025	AYM93_07120	AYO29_06140	AYM38_05325	CBU_1356	iron-sulfur cluster assembly scaffold protein	C	orthologs
966	AYN00_07305	AYM00_10570	AYM94_07325	AYM02_10205	AYM90_07325	AYM11_09890	AYO24_07300	AYO23_07315	AYM17_02915	AUR58_11085	AYM93_07320	AYO29_07280	AYM38_10065	CBU_1396	succinate--CoA ligase subunit alpha	C	orthologs
967	AYN00_07310	AYM00_10575	AYM94_07330	AYM02_10210	AYM90_07330	AYM11_09895	AYO24_07305	AYO23_07320	AYM17_02910	AUR58_11090	AYM93_07325	AYO29_07285	AYM38_10070	CBU_1397	succinate--CoA ligase subunit beta	C	orthologs
968	AYN00_07315	AYM00_10580	AYM94_07335	AYM02_10215	AYM90_07335	AYM11_09900	AYO24_07310	AYO23_07325	AYM17_02905	AUR58_11095	AYM93_07330	AYO29_07290	AYM38_10075	CBU_1398	dihydrolipoamide succinyltransferase	C	orthologs
969	AYN00_07320	AYM00_10585	AYM94_07340	AYM02_10220	AYM90_07340	AYM11_09905	AYO24_07315	AYO23_07330	AYM17_02900	AUR58_11100	AYM93_07335	AYO29_07295	AYM38_10080	CBU_1399	2-oxoglutarate dehydrogenase subunit E1	C	orthologs
970	AYN00_07325	AYM00_10590	AYM94_07345	AYM02_10225	AYM90_07345	AYM11_09910	AYO24_07320	AYO23_07335	AYM17_02895	AUR58_11105	AYM93_07340	AYO29_07300	AYM38_10085	CBU_1400	succinate dehydrogenase iron-sulfur subunit	C	orthologs
971	AYN00_07330	AYM00_10595	AYM94_07350	AYM02_10230	AYM90_07350	AYM11_09915	AYO24_07325	AYO23_07340	AYM17_02890	AUR58_11110	AYM93_07345	AYO29_07305	AYM38_10090	CBU_1401	succinate dehydrogenase	C	orthologs
972	AYN00_07335	AYM00_10600	AYM94_07355	AYM02_10235	AYM90_07355	AYM11_09920	AYO24_07330	AYO23_07345	AYM17_02885	AUR58_11115	AYM93_07350	AYO29_07310	AYM38_10095	CBU_1402	succinate dehydrogenase	C	orthologs
973	AYN00_07340	AYM00_10605	AYM94_07360	AYM02_10240	AYM90_07360	AYM11_09925	AYO24_07335	AYO23_07350	AYM17_02880	AUR58_11120	AYM93_07355	AYO29_07315	AYM38_10100	CBU_1403	succinate dehydrogenase	C	orthologs
974	AYN00_07355	AYM00_10625	AYM94_07375	AYM02_10265	AYM90_07375	AYM11_09940	AYO24_07355	AYO23_07365	AYM17_02860	AUR58_11145	AYM93_07370	AYO29_07340	AYM38_10115	CBU_1410	type II citrate synthase	C	orthologs
994	AYN00_07485	AYM00_05000	AYM94_07505	AYM02_04770	AYM90_07505	AYM11_04600	AYO24_07490	AYO23_07500	AYM17_02715	AUR58_05350	AYM93_07500	AYO29_03825	AYM38_04715	CBU_1435	NADH:ubiquinone oxidoreductase subunit N	C	orthologs
995	AYN00_07490	AYM00_04995	AYM94_07510	AYM02_04765	AYM90_07510	AYM11_04595	AYO24_07495	AYO23_07505	AYM17_02710	AUR58_05345	AYM93_07505	AYO29_03820	AYM38_04710	CBU_1436	NADH:ubiquinone oxidoreductase subunit M	C	orthologs
997	AYN00_07500	AYM00_04985	AYM94_07520	AYM02_04755	AYM90_07520	AYM11_04585	AYO24_07505	AYO23_07515	AYM17_02700	AUR58_05335	AYM93_07515	AYO29_03810	AYM38_04700	CBU_1438	NADH-quinone oxidoreductase subunit K	C	orthologs
998	AYN00_07505	AYM00_04980	AYM94_07525	AYM02_04750	AYM90_07525	AYM11_04580	AYO24_07510	AYO23_07520	AYM17_02695	AUR58_05330	AYM93_07520	AYO29_03805	AYM38_04695	CBU_1439	NADH:ubiquinone oxidoreductase subunit J	C	orthologs
999	AYN00_07510	AYM00_04975	AYM94_07530	AYM02_04745	AYM90_07530	AYM11_04575	AYO24_07515	AYO23_07525	AYM17_02690	AUR58_05325	AYM93_07525	AYO29_03800	AYM38_04690	CBU_1440	NADH-quinone oxidoreductase subunit I	C	orthologs
1000	AYN00_07515	AYM00_04970	AYM94_07535	AYM02_04740	AYM90_07535	AYM11_04570	AYO24_07520	AYO23_07530	AYM17_02685	AUR58_05320	AYM93_07530	AYO29_03795	AYM38_04685	CBU_1441	NADH:ubiquinone oxidoreductase subunit H	C	orthologs
1001	AYN00_07520	AYM00_04965	AYM94_07540	AYM02_04735	AYM90_07540	AYM11_04565	AYO24_07525	AYO23_07535	AYM17_02680	AUR58_05315	AYM93_07535	AYO29_03790	AYM38_04680	CBU_1442	NADH dehydrogenase	C	orthologs
1002	AYN00_07525	AYM00_04960	AYM94_07545	AYM02_04730	AYM90_07545	AYM11_04560	AYO24_07530	AYO23_07540	AYM17_02675	AUR58_05310	AYM93_07540	AYO29_03785	AYM38_04675	CBU_1443	NADH-quinone oxidoreductase subunit F	C	orthologs
1003	AYN00_07530	AYM00_04955	AYM94_07550	AYM02_04725	AYM90_07550	AYM11_04555	AYO24_07535	AYO23_07545	AYM17_02670	AUR58_05305	AYM93_07545	AYO29_03780	AYM38_04670	CBU_1444	NADH dehydrogenase	C	orthologs
1004	AYN00_07535	AYM00_04950	AYM94_07555	AYM02_04720	AYM90_07555	AYM11_04550	AYO24_07540	AYO23_07550	AYM17_02665	AUR58_05300	AYM93_07550	AYO29_03775	AYM38_04665	CBU_1445	NADH dehydrogenase	C	orthologs
1005	AYN00_07540	AYM00_04945	AYM94_07560	AYM02_04715	AYM90_07560	AYM11_04545	AYO24_07545	AYO23_07555	AYM17_02660	AUR58_05295	AYM93_07555	AYO29_03770	AYM38_04660	CBU_1446	NADH dehydrogenase	C	orthologs
1006	AYN00_07545	AYM00_04940	AYM94_07565	AYM02_04710	AYM90_07565	AYM11_04540	AYO24_07550	AYO23_07560	AYM17_02655	AUR58_05290	AYM93_07560	AYO29_03765	AYM38_04655	CBU_1447	NADH dehydrogenase	C	orthologs
1007	AYN00_07550	AYM00_04935	AYM94_07570	AYM02_04705	AYM90_07570	AYM11_04535	AYO24_07555	AYO23_07565	AYM17_02650	AUR58_05285	AYM93_07565	AYO29_03760	AYM38_04650	CBU_1448	NADH-quinone oxidoreductase subunit A	C	orthologs
1055	AYN00_07910	AYM00_04495	AYM94_07930	AYM02_04320	AYM90_07930	AYM11_04170	AYO24_07925	AYO23_07935	AYM17_02300	AUR58_04830	AYM93_07925	AYO29_08520	AYM38_04270	CBU_1518	glycerol-3-phosphate dehydrogenase	C	orthologs
1168	AYN00_06560	AYM00_03535	AYM94_06435	AYM02_03430	AYM90_06580	AYM11_03300	AYO24_08775	AYO23_08775	AYM17_01540	AUR58_03830	AYM93_06430	AYO29_01520	AYM38_03390	CBU_1696	4Fe-4S ferredoxin	C	orthologs
1186	AYN00_08550	AYM00_03410	AYM94_08585	AYM02_03305	AYM90_08570	AYM11_03190	AYO24_08885	AYO23_08885	AYM17_00450	AUR58_03700	AYM93_08580	AYO29_01400	AYM38_03270	CBU_1720	aconitate hydratase	C	orthologs
1294	AYN00_09370	AYM00_02515	AYM94_09395	AYM02_02455	AYM90_09385	AYM11_02370	AYO24_09695	AYO23_09685	AYM17_01215	AUR58_02795	AYM93_09390	AYO29_00765	AYM38_02425	CBU_1881	rubredoxin	C	orthologs
1336	AYN00_10195	AYM00_02245	AYM94_09725	AYM02_02190	AYM90_09715	AYM11_02110	AYO24_09960	AYO23_09950	AYM17_00205	AUR58_02515	AYM93_10210	AYO29_00210	AYM38_02160	CBU_1938	ATP synthase F0 subunit I	C	orthologs
1337	AYN00_10200	AYM00_02240	AYM94_09730	AYM02_02185	AYM90_09720	AYM11_02105	AYO24_09965	AYO23_09955	AYM17_00210	AUR58_02510	AYM93_10215	AYO29_00215	AYM38_02155	CBU_1939	F0F1 ATP synthase subunit A	C	orthologs
1339	AYN00_10210	AYM00_02230	AYM94_09740	AYM02_02175	AYM90_09730	AYM11_02095	AYO24_09975	AYO23_09965	AYM17_00220	AUR58_02500	AYM93_10225	AYO29_00225	AYM38_02145	CBU_1941	ATP synthase subunit B	C	orthologs
1340	AYN00_10215	AYM00_02225	AYM94_09745	AYM02_02170	AYM90_09735	AYM11_02090	AYO24_09980	AYO23_09970	AYM17_00225	AUR58_02495	AYM93_10230	AYO29_00230	AYM38_02140	CBU_1942	ATP synthase subunit delta	C	orthologs
1341	AYN00_10220	AYM00_02220	AYM94_09750	AYM02_02165	AYM90_09740	AYM11_02085	AYO24_09985	AYO23_09975	AYM17_00230	AUR58_02490	AYM93_10235	AYO29_00235	AYM38_02135	CBU_1943	ATP synthase subunit alpha	C	orthologs
1342	AYN00_10225	AYM00_02215	AYM94_09755	AYM02_02160	AYM90_09745	AYM11_02080	AYO24_09990	AYO23_09980	AYM17_00235	AUR58_02485	AYM93_10240	AYO29_00240	AYM38_02130	CBU_1944	F0F1 ATP synthase subunit gamma	C	orthologs
1343	AYN00_10230	AYM00_02210	AYM94_09760	AYM02_02155	AYM90_09750	AYM11_02075	AYO24_09995	AYO23_09985	AYM17_00240	AUR58_02480	AYM93_10245	AYO29_00245	AYM38_02125	CBU_1945	ATP synthase subunit beta	C	orthologs
1344	AYN00_10235	AYM00_02205	AYM94_09765	AYM02_02150	AYM90_09755	AYM11_02070	AYO24_10000	AYO23_09990	AYM17_00245	AUR58_02475	AYM93_10250	AYO29_00250	AYM38_02120	CBU_1946	ATP synthase F0F1 subunit epsilon	C	orthologs
1350	AYN00_10270	AYM00_02165	AYM94_09800	AYM02_02110	AYM90_09790	AYM11_02030	AYO24_10035	AYO23_10025	AYM17_01490	AUR58_02435	AYM93_10285	AYO29_00295	AYM38_02080	CBU_1955	NAD(P) transhydrogenase subunit alpha	C	orthologs
1377	AYN00_09475	AYM00_01375	AYM94_09490	AYM02_01355	AYM90_09480	AYM11_01315	AYO24_00420	AYO23_00425	AYM17_09845	AUR58_01640	AYM93_09485	AYO29_09950	AYM38_01330	CBU_1995	acylphosphatase	C	orthologs
1443	AYN00_09960	AYM00_01890	AYM94_10395	AYM02_01850	AYM90_10380	AYM11_01790	AYO24_10310	AYO23_10300	AYM17_10305	AUR58_02165	AYM93_09975	AYO29_10420	AYM38_01825	CBU_2092	phosphoenolpyruvate carboxykinase	C	orthologs
677	AYN00_04720	AYM00_08190	AYM94_04720	AYM02_07880	AYM90_04740	AYM11_07655	AYO24_04675	AYO23_04690	AYM17_05140	AUR58_08630	AYM93_04710	AYO29_04460	AYM38_07780	CBU_0941	Fe(2+)-trafficking protein	CO	orthologs
996	AYN00_07495	AYM00_04990	AYM94_07515	AYM02_04760	AYM90_07515	AYM11_04590	AYO24_07500	AYO23_07510	AYM17_02705	AUR58_05340	AYM93_07510	AYO29_03815	AYM38_04705	CBU_1437	NADH-quinone oxidoreductase subunit L	CP	orthologs
1097	AYN00_08210	AYM00_04140	AYM94_08235	AYM02_03995	AYM90_08230	AYM11_03855	AYO24_08230	AYO23_08235	AYM17_02000	AUR58_04460	AYM93_08230	AYO29_08845	AYM38_03955	CBU_1585	NADH/ubiquinone/plastoquinone	CP	orthologs
1100	AYN00_08225	AYM00_04125	AYM94_08250	AYM02_03980	AYM90_08245	AYM11_03840	AYO24_08245	AYO23_08250	AYM17_01985	AUR58_04445	AYM93_08245	AYO29_08860	AYM38_03940	CBU_1588	cation:proton antiporter	CP	orthologs
123	AYN00_00590	AYM00_00825	AYM94_00585	AYM02_00805	AYM90_00595	AYM11_00790	AYO24_00945	AYO23_00950	AYM17_09320	AUR58_01095	AYM93_00580	AYO29_09555	AYM38_00790	CBU_0117	cell division protein FtsL	D	orthologs
132	AYN00_00650	AYM00_00765	AYM94_00645	AYM02_00745	AYM90_00655	AYM11_00730	AYO24_01005	AYO23_01010	AYM17_09265	AUR58_01035	AYM93_00640	AYO29_09500	AYM38_00730	CBU_0132	cell division protein FtsW	D	orthologs
138	AYN00_00690	AYM00_00725	AYM94_00685	AYM02_00705	AYM90_00695	AYM11_00690	AYO24_01045	AYO23_01050	AYM17_09225	AUR58_00995	AYM93_00680	AYO29_09460	AYM38_00690	CBU_0140	cell division protein FtsA	D	orthologs
139	AYN00_00695	AYM00_00720	AYM94_00690	AYM02_00700	AYM90_00700	AYM11_00685	AYO24_01050	AYO23_01055	AYM17_09220	AUR58_00990	AYM93_00685	AYO29_09455	AYM38_00685	CBU_0141	cell division protein FtsZ	D	orthologs
402	AYN00_02690	AYM00_09940	AYM94_02685	AYM02_09560	AYM90_02705	AYM11_09275	AYO24_03030	AYO23_03035	AYM17_07130	AUR58_10430	AYM93_02675	AYO29_06495	AYM38_09440	CBU_0540	chromosome segregation protein SMC	D	orthologs
410	AYN00_02735	AYM00_09895	AYM94_02730	AYM02_09515	AYM90_02750	AYM11_09230	AYO24_03075	AYO23_03080	AYM17_07085	AUR58_10385	AYM93_02720	AYO29_06440	AYM38_09395	CBU_0549	rod shape-determining protein RodA	D	orthologs
653	AYN00_04545	AYM00_08010	AYM94_04545	AYM02_07705	AYM90_04565	AYM11_07485	AYO24_04850	AYO23_04865	AYM17_05305	AUR58_08450	AYM93_04535	AYO29_02660	AYM38_07605	CBU_0908	septation protein A	D	orthologs
752	AYN00_05360	AYM00_07230	AYM94_05365	AYM02_06925	AYM90_05380	AYM11_06710	AYO24_04040	AYO23_04055	AYM17_04480	AUR58_07655	AYM93_05355	AYO29_04660	AYM38_06830	CBU_1067	tRNA 2-thiocytidine biosynthesis protein TtcA	D	orthologs
824	AYN00_06230	AYM00_06530	AYM94_06560	AYM02_06250	AYM90_06250	AYM11_06050	AYO24_06305	AYO23_06320	AYM17_03910	AUR58_06940	AYM93_06555	AYO29_05330	AYM38_06180	CBU_1191	cell division protein FtsK	D	orthologs
1022	AYN00_07680	AYM00_04795	AYM94_07700	AYM02_04575	AYM90_07700	AYM11_04405	AYO24_07690	AYO23_07700	AYM17_02520	AUR58_05145	AYM93_07695	AYO29_08370	AYM38_04520	CBU_1471	rod shape-determining protein MreB	D	orthologs
1048	AYN00_07860	AYM00_04545	AYM94_07880	AYM02_04370	AYM90_07880	AYM11_04220	AYO24_07875	AYO23_07885	AYM17_02345	AUR58_04880	AYM93_07875	AYO29_08475	AYM38_04320	CBU_1509	tRNA(Ile)-lysidine synthase	D	orthologs
1062	AYN00_07995	AYM00_04400	AYM94_08015	AYM02_04235	AYM90_08010	AYM11_04090	AYO24_08015	AYO23_08020	AYM17_02225	AUR58_04740	AYM93_08010	AYO29_08600	AYM38_04185	CBU_1537	peptidase M23	D	orthologs
1152	AYN00_06425	AYM00_03685	AYM94_06300	AYM02_03570	AYM90_06445	AYM11_03440	AYO24_08640	AYO23_08640	AYM17_01665	AUR58_03980	AYM93_06295	AYO29_01645	AYM38_03535	CBU_1673	cell division protein FtsB	D	orthologs
1164	AYN00_06520	AYM00_03575	AYM94_06395	AYM02_03470	AYM90_06540	AYM11_03340	AYO24_08735	AYO23_08735	AYM17_01580	AUR58_03870	AYM93_06390	AYO29_01560	AYM38_03430	CBU_1689	sodium:proton antiporter	D	orthologs
1308	AYN00_10025	AYM00_02420	AYM94_09555	AYM02_02360	AYM90_09545	AYM11_02275	AYO24_09790	AYO23_09780	AYM17_00035	AUR58_02695	AYM93_10040	AYO29_00030	AYM38_02330	CBU_1904	cell division ATP-binding protein FtsE	D	orthologs
1309	AYN00_10030	AYM00_02415	AYM94_09560	AYM02_02355	AYM90_09550	AYM11_02270	AYO24_09795	AYO23_09785	AYM17_00040	AUR58_02690	AYM93_10045	AYO29_00035	AYM38_02325	CBU_1905	ABC transporter permease	D	orthologs
1323	AYN00_10110	AYM00_02325	AYM94_09640	AYM02_02270	AYM90_09630	AYM11_02190	AYO24_09875	AYO23_09865	AYM17_00125	AUR58_02595	AYM93_10125	AYO29_00125	AYM38_02240	CBU_1924	tRNA uridine(34) 5-carboxymethylaminomethyl synthesis enzyme MnmG	D	orthologs
1325	AYN00_10120	AYM00_02315	AYM94_09650	AYM02_02260	AYM90_09640	AYM11_02180	AYO24_09885	AYO23_09875	AYM17_00135	AUR58_02585	AYM93_10135	AYO29_00135	AYM38_02230	CBU_1926	chromosome partitioning protein	D	orthologs
45	AYN00_00040	AYM00_01980	AYM94_00045	AYM02_01935	AYM90_00050	AYM11_01860	AYO24_10210	AYO23_10200	AYM17_01320	AUR58_02255	AYM93_00035	AYO29_00860	AYM38_01900	CBU_0010	shikimate dehydrogenase	E	orthologs
67	AYN00_00185	AYM00_02125	AYM94_00190	AYM02_02080	AYM90_00195	AYM11_02005	AYO24_10060	AYO23_10050	AYM17_01465	AUR58_02400	AYM93_00180	AYO29_01005	AYM38_02045	CBU_0039	oligopeptidase A	E	orthologs
87	AYN00_00350	AYM00_01065	AYM94_00350	AYM02_01045	AYM90_00355	AYM11_01025	AYO24_00710	AYO23_00715	AYM17_09555	AUR58_01335	AYM93_00345	AYO29_09790	AYM38_01030	CBU_0073	peptidase M24	E	orthologs
160	AYN00_00880	AYM00_00535	AYM94_00875	AYM02_00515	AYM90_00885	AYM11_00500	AYO24_01235	AYO23_01240	AYM17_09000	AUR58_00805	AYM93_00870	AYO29_02725	AYM38_00500	CBU_0178	glycine/betaine ABC transporter ATP-binding protein	E	orthologs
166	AYN00_00970	AYM00_00440	AYM94_00965	AYM02_00420	AYM90_00975	AYM11_00400	AYO24_01325	AYO23_01330	AYM17_08910	AUR58_00710	AYM93_00960	AYO29_02815	AYM38_00405	CBU_0194	serine dehydratase	E	orthologs
231	AYN00_01395	AYM00_11065	AYM94_01390	AYM02_10695	AYM90_01405	AYM11_10355	AYO24_01750	AYO23_01755	AYM17_08485	AUR58_11595	AYM93_01385	AYO29_03420	AYM38_10535	CBU_0279	amidinotransferase	E	orthologs
269	AYN00_01665	AYM00_10785	AYM94_01660	AYM02_10420	AYM90_01675	AYM11_10085	AYO24_02015	AYO23_02020	AYM17_08195	AUR58_11315	AYM93_01655	AYO29_03685	AYM38_10260	CBU_0331	glycine oxidase	E	orthologs
276	AYN00_01700	AYM00_10750	AYM94_01695	AYM02_10385	AYM90_01710	AYM11_10050	AYO24_02050	AYO23_02055	AYM17_08160	AUR58_11280	AYM93_01690	AYO29_03720	AYM38_10225	CBU_0338	aminopeptidase N	E	orthologs
282	AYN00_01770	AYM00_05100	AYM94_01765	AYM02_04870	AYM90_01780	AYM11_04695	AYO24_02120	AYO23_02125	AYM17_08085	AUR58_05460	AYM93_01760	AYO29_03065	AYM38_04805	CBU_0354	amino acid permease	E	orthologs
314	AYN00_02110	AYM00_05430	AYM94_02100	AYM02_05210	AYM90_02125	AYM11_05035	AYO24_02450	AYO23_02455	AYM17_07765	AUR58_05810	AYM93_02095	AYO29_07995	AYM38_05145	CBU_0426	amino acid permease	E	orthologs
352	AYN00_02385	AYM00_10260	AYM94_02375	AYM02_09885	AYM90_02400	AYM11_09580	AYO24_02720	AYO23_02725	AYM17_07495	AUR58_10765	AYM93_02370	AYO29_06840	AYM38_09750	CBU_0481	arginine ABC transporter ATP-binding protein	E	orthologs
354	AYN00_02395	AYM00_10250	AYM94_02385	AYM02_09875	AYM90_02410	AYM11_09570	AYO24_02730	AYO23_02735	AYM17_07485	AUR58_10755	AYM93_02380	AYO29_06830	AYM38_09740	CBU_0483	ABC transporter	E	orthologs
355	AYN00_02400	AYM00_10245	AYM94_02390	AYM02_09870	AYM90_02415	AYM11_09565	AYO24_02735	AYO23_02740	AYM17_07480	AUR58_10750	AYM93_02385	AYO29_06825	AYM38_09735	CBU_0484	arginine transporter permease subunit ArtM	E	orthologs
373	AYN00_02495	AYM00_10145	AYM94_02485	AYM02_09760	AYM90_02510	AYM11_09470	AYO24_02835	AYO23_02840	AYM17_07385	AUR58_10635	AYM93_02480	AYO29_06730	AYM38_09635	CBU_0503	glutamine synthetase	E	orthologs
383	AYN00_02585	AYM00_10055	AYM94_02575	AYM02_09670	AYM90_02600	AYM11_09380	AYO24_02925	AYO23_02930	AYM17_07235	AUR58_10545	AYM93_02570	AYO29_06605	AYM38_09545	CBU_0517	aspartate aminotransferase	E	orthologs
386	AYN00_02600	AYM00_10040	AYM94_02590	AYM02_09655	AYM90_02615	AYM11_09365	AYO24_02940	AYO23_02945	AYM17_07220	AUR58_10530	AYM93_02585	AYO29_06590	AYM38_09530	CBU_0520	hydroxymethylglutaryl-CoA lyase	E	orthologs
391	AYN00_02625	AYM00_10005	AYM94_02620	AYM02_09625	AYM90_02640	AYM11_09340	AYO24_02965	AYO23_02970	AYM17_07195	AUR58_10495	AYM93_02610	AYO29_06560	AYM38_09505	CBU_0526	3-phosphoshikimate 1-carboxyvinyltransferase	E	orthologs
401	AYN00_02685	AYM00_09945	AYM94_02680	AYM02_09565	AYM90_02700	AYM11_09280	AYO24_03025	AYO23_03030	AYM17_07135	AUR58_10435	AYM93_02670	AYO29_06500	AYM38_09445	CBU_0539	peptide ABC transporter permease	E	orthologs
425	AYN00_02830	AYM00_09800	AYM94_02825	AYM02_09415	AYM90_02845	AYM11_09135	AYO24_03165	AYO23_03175	AYM17_06995	AUR58_10280	AYM93_02815	AYO29_06345	AYM38_09295	CBU_0570	amino acid permease	E	orthologs
426	AYN00_02840	AYM00_09790	AYM94_02835	AYM02_09405	AYM90_02855	AYM11_09125	AYO24_03175	AYO23_03185	AYM17_06985	AUR58_10270	AYM93_02825	AYO29_06335	AYM38_09285	CBU_0572	leucyl aminopeptidase	E	orthologs
476	AYN00_03170	AYM00_06680	AYM94_03165	AYM02_06390	AYM90_03185	AYM11_06180	AYO24_03505	AYO23_03515	AYM17_06675	AUR58_07090	AYM93_03155	AYO29_07870	AYM38_06325	CBU_0641	leucine dehydrogenase	E	orthologs
490	AYN00_03300	AYM00_06805	AYM94_03295	AYM02_06515	AYM90_03315	AYM11_06300	AYO24_03635	AYO23_03645	AYM17_06555	AUR58_07220	AYM93_03285	AYO29_07755	AYM38_06450	CBU_0666	succinyl-diaminopimelate desuccinylase	E	orthologs
491	AYN00_03305	AYM00_06810	AYM94_03300	AYM02_06520	AYM90_03320	AYM11_06305	AYO24_03640	AYO23_03650	AYM17_06550	AUR58_07225	AYM93_03290	AYO29_07750	AYM38_06455	CBU_0667	2,3,4,5-tetrahydropyridine-2,6-dicarboxylate N-succinyltransferase	E	orthologs
496	AYN00_03350	AYM00_06855	AYM94_03345	AYM02_06565	AYM90_03365	AYM11_06350	AYO24_03685	AYO23_03695	AYM17_06505	AUR58_07270	AYM93_03335	AYO29_07705	AYM38_06500	CBU_0673	histidinol phosphate phosphatase	E	orthologs
520	AYN00_03600	AYM00_07085	AYM94_03600	AYM02_06790	AYM90_03615	AYM11_06575	AYO24_03935	AYO23_03950	AYM17_06260	AUR58_07500	AYM93_03590	AYO29_07480	AYM38_06695	CBU_0720	agmatinase	E	orthologs
522	AYN00_03610	AYM00_07075	AYM94_03610	AYM02_06780	AYM90_03625	AYM11_06565	AYO24_03945	AYO23_03960	AYM17_06250	AUR58_07490	AYM93_03600	AYO29_07490	AYM38_06685	CBU_0722	ornithine decarboxylase	E	orthologs
596	AYN00_04160	AYM00_07640	AYM94_04160	AYM02_07335	AYM90_04175	AYM11_07115	AYO24_05235	AYO23_05250	AYM17_05690	AUR58_08080	AYM93_04150	AYO29_02285	AYM38_07235	CBU_0831	asparagine synthetase B	E	orthologs
605	AYN00_04205	AYM00_07685	AYM94_04205	AYM02_07380	AYM90_04220	AYM11_07160	AYO24_05190	AYO23_05205	AYM17_05645	AUR58_08125	AYM93_04195	AYO29_02330	AYM38_07280	CBU_0840	asparagine synthetase B	E	orthologs
632	AYN00_04375	AYM00_07855	AYM94_04375	AYM02_07550	AYM90_04390	AYM11_07330	AYO24_05020	AYO23_05035	AYM17_05475	AUR58_08295	AYM93_04365	AYO29_02500	AYM38_07450	CBU_0874	chorismate synthase	E	orthologs
633	AYN00_04380	AYM00_07860	AYM94_04380	AYM02_07555	AYM90_04395	AYM11_07335	AYO24_05015	AYO23_05030	AYM17_05470	AUR58_08300	AYM93_04370	AYO29_02505	AYM38_07455	CBU_0875	aspartate-semialdehyde dehydrogenase	E	orthologs
705	AYN00_04945	AYM00_08425	AYM94_04945	AYM02_08115	AYM90_04965	AYM11_07885	AYO24_04450	AYO23_04465	AYM17_04925	AUR58_08865	AYM93_04935	AYO29_04250	AYM38_08015	CBU_0982	phospho-2-dehydro-3-deoxyheptonate aldolase	E	orthologs
706	AYN00_04955	AYM00_08435	AYM94_04955	AYM02_08125	AYM90_04975	AYM11_07895	AYO24_04440	AYO23_04455	AYM17_04910	AUR58_08875	AYM93_04945	AYO29_04235	AYM38_08025	CBU_0984	prephenate dehydrogenase	E	orthologs
740	AYN00_05280	AYM00_08795	AYM94_05285	AYM02_08475	AYM90_05300	AYM11_08240	AYO24_04120	AYO23_04135	AYM17_04560	AUR58_09235	AYM93_05275	AYO29_03915	AYM38_08370	CBU_1051	aspartate kinase	E	orthologs
778	AYN00_05845	AYM00_09145	AYM94_05865	AYM02_08800	AYM90_05865	AYM11_08545	AYO24_05920	AYO23_05935	AYM17_04280	AUR58_09600	AYM93_05860	AYO29_04945	AYM38_08685	CBU_1116	alanine dehydrogenase	E	orthologs
788	AYN00_05910	AYM00_09220	AYM94_05930	AYM02_08865	AYM90_05930	AYM11_08610	AYO24_05990	AYO23_06005	AYM17_04210	AUR58_09675	AYM93_05925	AYO29_05015	AYM38_08755	CBU_1129	cysteine desulfurase IscS	E	orthologs
804	AYN00_06050	AYM00_09380	AYM94_06070	AYM02_09015	AYM90_06070	AYM11_08750	AYO24_06130	AYO23_06145	AYM17_04075	AUR58_09835	AYM93_06065	AYO29_05155	AYM38_08905	CBU_1154	indole-3-glycerol phosphate synthase	E	orthologs
805	AYN00_06060	AYM00_09390	AYM94_06080	AYM02_09025	AYM90_06080	AYM11_08760	AYO24_06140	AYO23_06155	AYM17_04065	AUR58_09845	AYM93_06075	AYO29_05165	AYM38_08915	CBU_1156	tryptophan synthase subunit alpha	E	orthologs
816	AYN00_06180	AYM00_09505	AYM94_06200	AYM02_09140	AYM90_06200	AYM11_08875	AYO24_06255	AYO23_06270	AYM17_03955	AUR58_09960	AYM93_06195	AYO29_05280	AYM38_09030	CBU_1182	class V aminotransferase	E	orthologs
834	AYN00_06285	AYM00_06475	AYM94_06615	AYM02_06195	AYM90_06305	AYM11_05995	AYO24_06360	AYO23_06375	AYM17_03855	AUR58_06885	AYM93_06610	AYO29_05385	AYM38_06125	CBU_1203	glutamate synthase	E	orthologs
845	AYN00_05520	AYM00_06345	AYM94_05540	AYM02_06085	AYM90_05615	AYM11_05880	AYO24_06450	AYO23_06460	AYM17_03745	AUR58_06750	AYM93_05535	AYO29_05475	AYM38_06010	CBU_1226	NAD-glutamate dehydrogenase	E	orthologs
933	AYN00_07060	AYM00_05665	AYM94_07080	AYM02_05435	AYM90_07080	AYM11_05255	AYO24_07055	AYO23_07070	AYM17_03135	AUR58_06070	AYM93_07075	AYO29_06095	AYM38_05370	CBU_1347	transporter	E	orthologs
942	AYN00_07110	AYM00_05615	AYM94_07130	AYM02_05385	AYM90_07130	AYM11_05205	AYO24_07105	AYO23_07120	AYM17_03090	AUR58_06020	AYM93_07125	AYO29_06145	AYM38_05320	CBU_1357	cysteine sulfinate desulfinase	E	orthologs
982	AYN00_07400	AYM00_10670	AYM94_07420	AYM02_10310	AYM90_07420	AYM11_09985	AYO24_07400	AYO23_07410	AYM17_02815	AUR58_11190	AYM93_07415	AYO29_07385	AYM38_10160	CBU_1419	serine hydroxymethyltransferase	E	orthologs
1060	AYN00_07960	AYM00_04445	AYM94_07980	AYM02_04275	AYM90_07975	AYM11_04125	AYO24_07970	AYO23_07980	AYM17_02250	AUR58_04785	AYM93_07975	AYO29_08570	AYM38_04220	CBU_1529	peptidase	E	orthologs
1064	AYN00_08005	AYM00_04390	AYM94_08025	AYM02_04225	AYM90_08020	AYM11_04080	AYO24_08025	AYO23_08030	AYM17_02215	AUR58_04730	AYM93_08020	AYO29_08610	AYM38_04175	CBU_1539	tryptophan/tyrosine permease	E	orthologs
1178	AYN00_06620	AYM00_03470	AYM94_06495	AYM02_03365	AYM90_06640	AYM11_03240	AYO24_08835	AYO23_08835	AYM17_00295	AUR58_03760	AYM93_06490	AYO29_01460	AYM38_03325	CBU_1709	4-hydroxy-tetrahydrodipicolinate reductase	E	orthologs
1180	AYN00_06640	AYM00_03450	AYM94_06515	AYM02_03345	AYM90_06660	AYM11_03220	AYO24_08855	AYO23_08855	AYM17_00420	AUR58_03740	AYM93_06510	AYO29_01430	AYM38_03305	CBU_1713	glycine dehydrogenase	E	orthologs
1181	AYN00_06645	AYM00_03445	AYM94_06520	AYM02_03340	AYM90_06665	AYM11_03215	AYO24_08860	AYO23_08860	AYM17_00425	AUR58_03735	AYM93_06515	AYO29_01425	AYM38_03300	CBU_1714	glycine dehydrogenase	E	orthologs
1182	AYN00_06650	AYM00_03440	AYM94_06525	AYM02_03335	AYM90_06670	AYM11_03210	AYO24_08865	AYO23_08865	AYM17_00430	AUR58_03730	AYM93_06520	AYO29_01420	AYM38_03295	CBU_1715	glycine cleavage system protein H	E	orthologs
1183	AYN00_06655	AYM00_03435	AYM94_06530	AYM02_03330	AYM90_06675	AYM11_03205	AYO24_08870	AYO23_08870	AYM17_00435	AUR58_03725	AYM93_06525	AYO29_01415	AYM38_03290	CBU_1716	glycine cleavage system protein T	E	orthologs
1190	AYN00_08590	AYM00_03370	AYM94_08625	AYM02_03265	AYM90_08610	AYM11_03150	AYO24_08925	AYO23_08925	AYM17_00495	AUR58_03660	AYM93_08620	AYO29_01355	AYM38_03230	CBU_1727	ornithine cyclodeaminase	E	orthologs
1193	AYN00_08605	AYM00_03345	AYM94_08640	AYM02_03250	AYM90_08625	AYM11_03135	AYO24_08940	AYO23_08940	AYM17_00510	AUR58_03635	AYM93_08635	AYO29_01340	AYM38_03210	CBU_1730	phosphoserine phosphatase	E	orthologs
1232	AYN00_08925	AYM00_03000	AYM94_08955	AYM02_02925	AYM90_08940	AYM11_02830	AYO24_09250	AYO23_09250	AYM17_00805	AUR58_03280	AYM93_08950	AYO29_01065	AYM38_02890	CBU_1796	amino acid permease	E	orthologs
1234	AYN00_08935	AYM00_02990	AYM94_08965	AYM02_02915	AYM90_08950	AYM11_02820	AYO24_09260	AYO23_09260	AYM17_00815	AUR58_03270	AYM93_08960	AYO29_01075	AYM38_02880	CBU_1798	amino acid transporter	E	orthologs
1258	AYN00_09135	AYM00_02770	AYM94_09165	AYM02_02700	AYM90_09150	AYM11_02615	AYO24_09460	AYO23_09460	AYM17_00975	AUR58_03040	AYM93_09160	AYO29_00530	AYM38_02675	CBU_1836	homoserine dehydrogenase	E	orthologs
1276	AYN00_09275	AYM00_02615	AYM94_09305	AYM02_02555	AYM90_09290	AYM11_02470	AYO24_09595	AYO23_09595	AYM17_01115	AUR58_02890	AYM93_09300	AYO29_00670	AYM38_02525	CBU_1862	EF-P beta-lysylation protein EpmB	E	orthologs
1300	AYN00_09420	AYM00_02465	AYM94_09445	AYM02_02405	AYM90_09435	AYM11_02320	AYO24_09745	AYO23_09735	AYM17_01265	AUR58_02745	AYM93_09440	AYO29_00810	AYM38_02375	CBU_1892	shikimate kinase	E	orthologs
1301	AYN00_09425	AYM00_02460	AYM94_09450	AYM02_02400	AYM90_09440	AYM11_02315	AYO24_09750	AYO23_09740	AYM17_01270	AUR58_02740	AYM93_09445	AYO29_00815	AYM38_02370	CBU_1893	3-dehydroquinate synthase	E	orthologs
1358	AYN00_10330	AYM00_01265	AYM94_09860	AYM02_01245	AYM90_09850	AYM11_01205	AYO24_00520	AYO23_00525	AYM17_09735	AUR58_01530	AYM93_10345	AYO29_09835	AYM38_01220	CBU_1970	diaminopimelate epimerase	E	orthologs
1378	AYN00_09480	AYM00_01380	AYM94_09495	AYM02_01360	AYM90_09485	AYM11_01320	AYO24_00415	AYO23_00420	AYM17_09850	AUR58_01645	AYM93_09490	AYO29_09955	AYM38_01335	CBU_1996	histidinol-phosphatase	E	orthologs
1401	AYN00_09605	AYM00_01515	AYM94_10040	AYM02_01495	AYM90_10025	AYM11_01445	AYO24_00290	AYO23_00290	AYM17_09975	AUR58_01780	AYM93_09620	AYO29_10080	AYM38_01465	CBU_2020	transporter	E	orthologs
1403	AYN00_09625	AYM00_01535	AYM94_10060	AYM02_01515	AYM90_10045	AYM11_01465	AYO24_00270	AYO23_00270	AYM17_09995	AUR58_01800	AYM93_09640	AYO29_10100	AYM38_01485	CBU_2024	cystathionine beta-lyase	E	orthologs
1404	AYN00_09630	AYM00_01545	AYM94_10065	AYM02_01520	AYM90_10050	AYM11_01470	AYO24_00265	AYO23_00265	AYM17_10000	AUR58_01815	AYM93_09645	AYO29_10105	AYM38_01495	CBU_2025	cystathionine beta-lyase	E	orthologs
1411	AYN00_09740	AYM00_01655	AYM94_10175	AYM02_01630	AYM90_10160	AYM11_01580	AYO24_00160	AYO23_00160	AYM17_10085	AUR58_01925	AYM93_09755	AYO29_10200	AYM38_01605	CBU_2047	5,10-methylenetetrahydrofolate reductase	E	orthologs
1412	AYN00_09745	AYM00_01660	AYM94_10180	AYM02_01635	AYM90_10165	AYM11_01585	AYO24_00155	AYO23_00155	AYM17_10090	AUR58_01930	AYM93_09760	AYO29_10205	AYM38_01610	CBU_2048	5-methyltetrahydropteroyltriglutamate-- homocysteine methyltransferase	E	orthologs
1423	AYN00_09850	AYM00_01765	AYM94_10285	AYM02_01740	AYM90_10270	AYM11_01690	AYO24_00050	AYO23_00050	AYM17_10195	AUR58_02035	AYM93_09865	AYO29_10300	AYM38_01715	CBU_2070	chorismate mutase	E	orthologs
1428	AYN00_09875	AYM00_01800	AYM94_10310	AYM02_01770	AYM90_10295	AYM11_01715	AYO24_00025	AYO23_00025	AYM17_10220	AUR58_02070	AYM93_09890	AYO29_10330	AYM38_01745	CBU_2075	3-dehydroquinate dehydratase	E	orthologs
1441	AYN00_09950	AYM00_01880	AYM94_10385	AYM02_01840	AYM90_10370	AYM11_01780	AYO24_10300	AYO23_10290	AYM17_10295	AUR58_02155	AYM93_09965	AYO29_10410	AYM38_01815	CBU_2090	pyrroline-5-carboxylate reductase	E	orthologs
891	AYN00_06725	AYM00_06030	AYM94_06745	AYM02_05795	AYM90_06745	AYM11_05605	AYO24_06720	AYO23_06735	AYM17_03465	AUR58_06430	AYM93_06740	AYO29_05750	AYM38_05725	CBU_1281	carbamoyl phosphate synthase large subunit	EF	orthologs
892	AYN00_06730	AYM00_06025	AYM94_06750	AYM02_05790	AYM90_06750	AYM11_05600	AYO24_06725	AYO23_06740	AYM17_03460	AUR58_06425	AYM93_06745	AYO29_05755	AYM38_05720	CBU_1282	carbamoyl phosphate synthase small subunit	EF	orthologs
309	AYN00_02075	AYM00_05395	AYM94_02065	AYM02_05175	AYM90_02090	AYM11_05000	AYO24_02415	AYO23_02420	AYM17_07800	AUR58_05775	AYM93_02060	AYO29_08030	AYM38_05110	CBU_0418	4-amino-4-deoxychorismate lyase	EH	orthologs
952	AYN00_07180	AYM00_10440	AYM94_07200	AYM02_10075	AYM90_07200	AYM11_09760	AYO24_07175	AYO23_07190	AYM17_03020	AUR58_10955	AYM93_07195	AYO29_04745	AYM38_09935	CBU_1373	aminobenzoate synthetase	EH	orthologs
1284	AYN00_09320	AYM00_02570	AYM94_09345	AYM02_02510	AYM90_09335	AYM11_02425	AYO24_09640	AYO23_09635	AYM17_01165	AUR58_02850	AYM93_09340	AYO29_00715	AYM38_02480	CBU_1871	anthranilate synthase	EH	orthologs
840	AYN00_05490	AYM00_06380	AYM94_05515	AYM02_06110	AYM90_05585	AYM11_05910	AYO24_06420	AYO23_06435	AYM17_03770	AUR58_06790	AYM93_05510	AYO29_05450	AYM38_06035	CBU_1222	4-hydroxy-tetrahydrodipicolinate synthase	EM	orthologs
119	AYN00_00565	AYM00_00850	AYM94_00560	AYM02_00830	AYM90_00570	AYM11_00815	AYO24_00920	AYO23_00925	AYM17_09345	AUR58_01120	AYM93_00555	AYO29_09580	AYM38_00815	CBU_0112	L-threonine 3-dehydrogenase	ER	orthologs
438	AYN00_02905	AYM00_09680	AYM94_02900	AYM02_09300	AYM90_02920	AYM11_09025	AYO24_03240	AYO23_03250	AYM17_06920	AUR58_10160	AYM93_02890	AYO29_06270	AYM38_09185	CBU_0586	pyridine nucleotide-disulfide oxidoreductase	ER	orthologs
353	AYN00_02390	AYM00_10255	AYM94_02380	AYM02_09880	AYM90_02405	AYM11_09575	AYO24_02725	AYO23_02730	AYM17_07490	AUR58_10760	AYM93_02375	AYO29_06835	AYM38_09745	CBU_0482	arginine ABC transporter substrate-binding protein	ET	orthologs
48	AYN00_00065	AYM00_02005	AYM94_00070	AYM02_01960	AYM90_00075	AYM11_01885	AYO24_10185	AYO23_10175	AYM17_01345	AUR58_02280	AYM93_00060	AYO29_00885	AYM38_01925	CBU_0016	purine-nucleoside phosphorylase	F	orthologs
49	AYN00_00070	AYM00_02010	AYM94_00075	AYM02_01965	AYM90_00080	AYM11_01890	AYO24_10180	AYO23_10170	AYM17_01350	AUR58_02285	AYM93_00065	AYO29_00890	AYM38_01930	CBU_0017	2-deoxyribose-5-phosphate aldolase	F	orthologs
69	AYN00_00210	AYM00_01200	AYM94_00210	AYM02_01185	AYM90_00215	AYM11_01155	AYO24_00685	AYO23_00690	AYM17_09685	AUR58_01470	AYM93_00205	AYO29_09150	AYM38_01165	CBU_0043	non-canonical purine NTP pyrophosphatase	F	orthologs
143	AYN00_00735	AYM00_00680	AYM94_00730	AYM02_00660	AYM90_00740	AYM11_00645	AYO24_01090	AYO23_01095	AYM17_09175	AUR58_00950	AYM93_00725	AYO29_09415	AYM38_00645	CBU_0148	7,8-dihydro-8-oxoguanine-triphosphatase	F	orthologs
241	AYN00_01470	AYM00_10990	AYM94_01465	AYM02_10620	AYM90_01480	AYM11_10280	AYO24_01825	AYO23_01830	AYM17_08410	AUR58_11520	AYM93_01460	AYO29_03500	AYM38_10460	CBU_0293	deoxyuridine 5'-triphosphate nucleotidohydrolase	F	orthologs
243	AYN00_01485	AYM00_10975	AYM94_01480	AYM02_10605	AYM90_01495	AYM11_10265	AYO24_01840	AYO23_01845	AYM17_08395	AUR58_11505	AYM93_01475	AYO29_03515	AYM38_10445	CBU_0296	orotate phosphoribosyltransferase	F	orthologs
248	AYN00_01510	AYM00_10950	AYM94_01505	AYM02_10580	AYM90_01520	AYM11_10240	AYO24_01865	AYO23_01870	AYM17_08370	AUR58_11480	AYM93_01500	AYO29_03540	AYM38_10420	CBU_0301	guanylate kinase	F	orthologs
267	AYN00_01640	AYM00_10810	AYM94_01635	AYM02_10445	AYM90_01650	AYM11_10110	AYO24_01995	AYO23_02000	AYM17_08230	AUR58_11340	AYM93_01630	AYO29_03665	AYM38_10285	CBU_0326	phosphoribosylamine--glycine ligase	F	orthologs
274	AYN00_01690	AYM00_10760	AYM94_01685	AYM02_10395	AYM90_01700	AYM11_10060	AYO24_02040	AYO23_02045	AYM17_08170	AUR58_11290	AYM93_01680	AYO29_03710	AYM38_10235	CBU_0336	bifunctional phosphoribosylaminoimidazolecarboxamide formyltransferase/inosine monophosphate cyclohydrolase	F	orthologs
332	AYN00_02250	AYM00_10395	AYM94_02240	AYM02_10020	AYM90_02265	AYM11_09715	AYO24_02585	AYO23_02590	AYM17_07625	AUR58_10900	AYM93_02235	AYO29_06975	AYM38_09885	CBU_0454	adenylate kinase	F	orthologs
369	AYN00_02475	AYM00_10170	AYM94_02465	AYM02_09790	AYM90_02490	AYM11_09490	AYO24_02810	AYO23_02815	AYM17_07405	AUR58_10665	AYM93_02460	AYO29_06750	AYM38_09655	CBU_0499	thymidylate kinase	F	orthologs
392	AYN00_02630	AYM00_10000	AYM94_02625	AYM02_09620	AYM90_02645	AYM11_09335	AYO24_02970	AYO23_02975	AYM17_07190	AUR58_10490	AYM93_02615	AYO29_06555	AYM38_09500	CBU_0527	cytidylate kinase	F	orthologs
396	AYN00_02650	AYM00_09980	AYM94_02645	AYM02_09600	AYM90_02665	AYM11_09315	AYO24_02990	AYO23_02995	AYM17_07170	AUR58_10470	AYM93_02635	AYO29_06535	AYM38_09480	CBU_0531	orotidine 5'-phosphate decarboxylase	F	orthologs
468	AYN00_03125	AYM00_06635	AYM94_03120	AYM02_06345	AYM90_03140	AYM11_06135	AYO24_03460	AYO23_03470	AYM17_06720	AUR58_07045	AYM93_03110	AYO29_07915	AYM38_06280	CBU_0631	phosphoribosylformylglycinamidine synthase	F	orthologs
529	AYN00_03660	AYM00_08990	AYM94_03660	AYM02_08655	AYM90_03675	AYM11_08410	AYO24_05740	AYO23_05755	AYM17_06200	AUR58_09430	AYM93_03650	AYO29_01765	AYM38_08550	CBU_0735	uridine phosphorylase	F	orthologs
556	AYN00_03850	AYM00_07325	AYM94_03850	AYM02_07025	AYM90_03865	AYM11_06805	AYO24_05550	AYO23_05565	AYM17_06010	AUR58_07760	AYM93_03840	AYO29_01995	AYM38_06925	CBU_0769	GMP synthase	F	orthologs
589	AYN00_04125	AYM00_07605	AYM94_04125	AYM02_07300	AYM90_04140	AYM11_07080	AYO24_05270	AYO23_05285	AYM17_05725	AUR58_08045	AYM93_04115	AYO29_02250	AYM38_07200	CBU_0824	adenylosuccinate lyase	F	orthologs
630	AYN00_04365	AYM00_07845	AYM94_04365	AYM02_07540	AYM90_04380	AYM11_07320	AYO24_05030	AYO23_05045	AYM17_05485	AUR58_08285	AYM93_04355	AYO29_02490	AYM38_07440	CBU_0872	uridine kinase	F	orthologs
648	AYN00_04490	AYM00_07955	AYM94_04490	AYM02_07650	AYM90_04505	AYM11_07430	AYO24_04905	AYO23_04920	AYM17_05360	AUR58_08395	AYM93_04480	AYO29_02595	AYM38_07550	CBU_0897	amidophosphoribosyltransferase	F	orthologs
681	AYN00_04750	AYM00_08220	AYM94_04750	AYM02_07910	AYM90_04770	AYM11_07685	AYO24_04645	AYO23_04660	AYM17_05110	AUR58_08660	AYM93_04740	AYO29_04430	AYM38_07810	CBU_0946	death-on-curing protein	F	orthologs
694	AYN00_04890	AYM00_08365	AYM94_04890	AYM02_08055	AYM90_04910	AYM11_07830	AYO24_04505	AYO23_04520	AYM17_04980	AUR58_08800	AYM93_04880	AYO29_04305	AYM38_07955	CBU_0971	dihydroorotate dehydrogenase	F	orthologs
715	AYN00_05020	AYM00_08510	AYM94_05020	AYM02_08195	AYM90_05040	AYM11_07960	AYO24_04375	AYO23_04390	AYM17_04845	AUR58_08950	AYM93_05010	AYO29_04170	AYM38_08095	CBU_0998	adenylosuccinate synthetase	F	orthologs
756	AYN00_05400	AYM00_07190	AYM94_05405	AYM02_06885	AYM90_05420	AYM11_06670	AYO24_04000	AYO23_04015	AYM17_04445	AUR58_07615	AYM93_05395	AYO29_04700	AYM38_06790	CBU_1074	hypoxanthine-guanine phosphoribosyltransferase	F	orthologs
838	AYN00_05480	AYM00_06390	AYM94_05505	AYM02_06120	AYM90_05575	AYM11_05920	AYO24_06410	AYO23_06425	AYM17_03780	AUR58_06800	AYM93_05500	AYO29_05440	AYM38_06045	CBU_1220	phosphoribosylaminoimidazolesuccinocarboxamide synthase	F	orthologs
869	AYN00_05670	AYM00_06180	AYM94_05690	AYM02_05930	AYM90_05765	AYM11_05730	AYO24_06600	AYO23_06610	AYM17_03595	AUR58_06580	AYM93_05685	AYO29_05630	AYM38_05855	CBU_1258	nucleoside-diphosphate kinase	F	orthologs
931	AYN00_07035	AYM00_05705	AYM94_07055	AYM02_05475	AYM90_07055	AYM11_05295	AYO24_07030	AYO23_07045	AYM17_03165	AUR58_06105	AYM93_07050	AYO29_06070	AYM38_05410	CBU_1341	GMP synthase	F	orthologs
932	AYN00_07040	AYM00_05700	AYM94_07060	AYM02_05470	AYM90_07060	AYM11_05290	AYO24_07035	AYO23_07050	AYM17_03160	AUR58_06100	AYM93_07055	AYO29_06075	AYM38_05405	CBU_1342	IMP dehydrogenase	F	orthologs
959	AYN00_07235	AYM00_10495	AYM94_07255	AYM02_10130	AYM90_07255	AYM11_09815	AYO24_07230	AYO23_07245	AYM17_02965	AUR58_11010	AYM93_07250	AYO29_07210	AYM38_09990	CBU_1384	UMP kinase	F	orthologs
1068	AYN00_08030	AYM00_04345	AYM94_08050	AYM02_04185	AYM90_08050	AYM11_04040	AYO24_08050	AYO23_08055	AYM17_02175	AUR58_04680	AYM93_08045	AYO29_08640	AYM38_04140	CBU_1547	thymidylate synthase	F	orthologs
1075	AYN00_08065	AYM00_04310	AYM94_08085	AYM02_04150	AYM90_08085	AYM11_04005	AYO24_08085	AYO23_08090	AYM17_02140	AUR58_04645	AYM93_08080	AYO29_08675	AYM38_04105	CBU_1553	ribonucleotide-diphosphate reductase subunit alpha	F	orthologs
1076	AYN00_08070	AYM00_04305	AYM94_08090	AYM02_04145	AYM90_08090	AYM11_04000	AYO24_08090	AYO23_08095	AYM17_02135	AUR58_04640	AYM93_08085	AYO29_08680	AYM38_04100	CBU_1554	ribonucleotide-diphosphate reductase subunit beta	F	orthologs
1159	AYN00_06475	AYM00_03625	AYM94_06350	AYM02_03520	AYM90_06495	AYM11_03390	AYO24_08690	AYO23_08690	AYM17_01620	AUR58_03920	AYM93_06345	AYO29_01600	AYM38_03480	CBU_1682	CTP synthetase	F	orthologs
1163	AYN00_06515	AYM00_03580	AYM94_06390	AYM02_03475	AYM90_06535	AYM11_03345	AYO24_08730	AYO23_08730	AYM17_01585	AUR58_03875	AYM93_06385	AYO29_01565	AYM38_03435	CBU_1688	dCTP deaminase	F	orthologs
1173	AYN00_06590	AYM00_03500	AYM94_06465	AYM02_03395	AYM90_06610	AYM11_03270	AYO24_08805	AYO23_08805	AYM17_00265	AUR58_03790	AYM93_06460	AYO29_01490	AYM38_03355	CBU_1703	dihydroorotase	F	orthologs
1197	AYN00_08640	AYM00_03310	AYM94_08675	AYM02_03215	AYM90_08660	AYM11_03100	AYO24_08970	AYO23_08970	AYM17_00545	AUR58_03600	AYM93_08670	AYO29_01310	AYM38_03175	CBU_1736	phosphoribosylaminoimidazole synthetase	F	orthologs
1198	AYN00_08645	AYM00_03305	AYM94_08680	AYM02_03210	AYM90_08665	AYM11_03095	AYO24_08975	AYO23_08975	AYM17_00550	AUR58_03595	AYM93_08675	AYO29_01305	AYM38_03170	CBU_1737	phosphoribosylglycinamide formyltransferase	F	orthologs
1384	AYN00_09510	AYM00_01415	AYM94_09525	AYM02_01400	AYM90_09515	AYM11_01350	AYO24_00385	AYO23_00390	AYM17_09880	AUR58_01685	AYM93_09520	AYO29_09985	AYM38_01370	CBU_2002	phosphoribosylaminoimidazole carboxylase	F	orthologs
1422	AYN00_09845	AYM00_01760	AYM94_10280	AYM02_01735	AYM90_10265	AYM11_01685	AYO24_00055	AYO23_00055	AYM17_10190	AUR58_02030	AYM93_09860	AYO29_10295	AYM38_01710	CBU_2069	thymidine kinase	F	orthologs
1446	AYN00_09975	AYM00_01905	AYM94_10410	AYM02_01865	AYM90_10395	AYM11_01805	AYO24_10325	AYO23_10315	AYM17_10320	AUR58_02180	AYM93_09990	AYO29_10435	AYM38_01840	CBU_2095	aspartate carbamoyltransferase catalytic subunit	F	orthologs
1252	AYN00_09105	AYM00_02805	AYM94_09135	AYM02_02735	AYM90_09120	AYM11_02645	AYO24_09430	AYO23_09430	AYM17_00945	AUR58_03080	AYM93_09130	AYO29_00500	AYM38_02705	CBU_1830	ribose-phosphate pyrophosphokinase	FE	orthologs
571	AYN00_03985	AYM00_07460	AYM94_03985	AYM02_07160	AYM90_04000	AYM11_06940	AYO24_05415	AYO23_05430	AYM17_05860	AUR58_07895	AYM93_03975	AYO29_02125	AYM38_07060	CBU_0796	histidine triad nucleotide-binding protein	FGR	orthologs
460	AYN00_03080	AYM00_06580	AYM94_03075	AYM02_06295	AYM90_03095	AYM11_06090	AYO24_03415	AYO23_03425	AYM17_06765	AUR58_06990	AYM93_03065	AYO29_07960	AYM38_06230	CBU_0622	zinc-binding protein	FJ	orthologs
953	AYN00_07185	AYM00_10445	AYM94_07205	AYM02_10080	AYM90_07205	AYM11_09765	AYO24_07180	AYO23_07195	AYM17_03015	AUR58_10960	AYM93_07200	AYO29_04750	AYM38_09940	CBU_1374	guanine deaminase	FJ	orthologs
387	AYN00_02605	AYM00_10035	AYM94_02595	AYM02_09650	AYM90_02620	AYM11_09360	AYO24_02945	AYO23_02950	AYM17_07215	AUR58_10525	AYM93_02590	AYO29_06585	AYM38_09525	CBU_0521	N-ethylammeline chlorohydrolase	FR	orthologs
56	AYN00_00115	AYM00_02055	AYM94_00120	AYM02_02010	AYM90_00125	AYM11_01935	AYO24_10135	AYO23_10125	AYM17_01395	AUR58_02330	AYM93_00110	AYO29_00935	AYM38_01975	CBU_0026	ribose-5-phosphate isomerase	G	orthologs
221	AYN00_01325	AYM00_00065	AYM94_01320	AYM02_00060	AYM90_01335	AYM11_00045	AYO24_01680	AYO23_01685	AYM17_08550	AUR58_00315	AYM93_01315	AYO29_03355	AYM38_00050	CBU_0265	MFS transporter	G	orthologs
224	AYN00_01355	AYM00_00035	AYM94_01350	AYM02_00030	AYM90_01365	AYM11_00015	AYO24_01710	AYO23_01715	AYM17_08525	AUR58_00285	AYM93_01345	AYO29_03380	AYM38_00020	CBU_0272	MFS transporter	G	orthologs
242	AYN00_01475	AYM00_10985	AYM94_01470	AYM02_10615	AYM90_01485	AYM11_10275	AYO24_01830	AYO23_01835	AYM17_08405	AUR58_11515	AYM93_01465	AYO29_03505	AYM38_10455	CBU_0294	phosphoglucomutase	G	orthologs
277	AYN00_01715	AYM00_10735	AYM94_01710	AYM02_10370	AYM90_01725	AYM11_10035	AYO24_02065	AYO23_02070	AYM17_08145	AUR58_11265	AYM93_01705	AYO29_03735	AYM38_10210	CBU_0341	6-phosphofructokinase	G	orthologs
310	AYN00_02080	AYM00_05400	AYM94_02070	AYM02_05180	AYM90_02095	AYM11_05005	AYO24_02420	AYO23_02425	AYM17_07795	AUR58_05780	AYM93_02065	AYO29_08025	AYM38_05115	CBU_0419	polysaccharide deacetylase	G	orthologs
395	AYN00_02645	AYM00_09985	AYM94_02640	AYM02_09605	AYM90_02660	AYM11_09320	AYO24_02985	AYO23_02990	AYM17_07175	AUR58_10475	AYM93_02630	AYO29_06540	AYM38_09485	CBU_0530	N-acetylglucosaminyl transferase	G	orthologs
421	AYN00_02810	AYM00_09820	AYM94_02805	AYM02_09435	AYM90_02825	AYM11_09155	AYO24_03145	AYO23_03155	AYM17_07015	AUR58_10300	AYM93_02795	AYO29_06365	AYM38_09315	CBU_0566	MFS transporter	G	orthologs
497	AYN00_03355	AYM00_06860	AYM94_03350	AYM02_06570	AYM90_03370	AYM11_06355	AYO24_03690	AYO23_03700	AYM17_06500	AUR58_07275	AYM93_03340	AYO29_07700	AYM38_06505	CBU_0674	sugar isomerase	G	orthologs
536	AYN00_03705	AYM00_08945	AYM94_03705	AYM02_08610	AYM90_03720	AYM11_08370	AYO24_05695	AYO23_05710	AYM17_06155	AUR58_09385	AYM93_03695	AYO29_01810	AYM38_08505	CBU_0743	phosphocarrier protein HPr	G	orthologs
557	AYN00_03860	AYM00_07335	AYM94_03860	AYM02_07035	AYM90_03875	AYM11_06815	AYO24_05540	AYO23_05555	AYM17_06000	AUR58_07770	AYM93_03850	AYO29_02005	AYM38_06935	CBU_0771	2-methylisocitrate lyase	G	orthologs
572	AYN00_03990	AYM00_07465	AYM94_03990	AYM02_07165	AYM90_04005	AYM11_06945	AYO24_05410	AYO23_05425	AYM17_05855	AUR58_07900	AYM93_03980	AYO29_02130	AYM38_07065	CBU_0797	MFS transporter	G	orthologs
612	AYN00_04245	AYM00_07725	AYM94_04245	AYM02_07420	AYM90_04260	AYM11_07200	AYO24_05150	AYO23_05165	AYM17_05605	AUR58_08165	AYM93_04235	AYO29_02370	AYM38_07320	CBU_0848	glucose-6-phosphate isomerase	G	orthologs
616	AYN00_04270	AYM00_07750	AYM94_04270	AYM02_07445	AYM90_04285	AYM11_07225	AYO24_05125	AYO23_05140	AYM17_05580	AUR58_08190	AYM93_04260	AYO29_02395	AYM38_07345	CBU_0853	methylglyoxal synthase	G	orthologs
652	AYN00_04535	AYM00_08000	AYM94_04535	AYM02_07695	AYM90_04555	AYM11_07475	AYO24_04860	AYO23_04875	AYM17_05320	AUR58_08440	AYM93_04525	AYO29_02645	AYM38_07595	CBU_0906	MFS transporter	G	orthologs
664	AYN00_04620	AYM00_08090	AYM94_04620	AYM02_07780	AYM90_04640	AYM11_07555	AYO24_04775	AYO23_04790	AYM17_05240	AUR58_08530	AYM93_04610	AYO29_04560	AYM38_07680	CBU_0922	MFS transporter	G	orthologs
757	AYN00_05415	AYM00_07175	AYM94_05440	AYM02_06870	AYM90_05435	AYM11_06655	AYO24_03990	AYO23_04005	AYM17_04435	AUR58_07595	AYM93_05435	AYO29_04775	AYM38_06780	CBU_1077	beta-hexosaminidase	G	orthologs
766	AYN00_05465	AYM00_09045	AYM94_05490	AYM02_08710	AYM90_05485	AYM11_08465	AYO24_05795	AYO23_05810	AYM17_04380	AUR58_09490	AYM93_05485	AYO29_04890	AYM38_08605	CBU_1088	bifunctional ADP-dependent (S)-NAD(P)H-hydrate dehydratase/NAD(P)H-hydrate epimerase	G	orthologs
790	AYN00_05930	AYM00_09240	AYM94_05950	AYM02_08885	AYM90_05950	AYM11_08630	AYO24_06010	AYO23_06025	AYM17_04190	AUR58_09695	AYM93_05945	AYO29_05035	AYM38_08775	CBU_1133	inositol monophosphatase	G	orthologs
813	AYN00_06165	AYM00_09490	AYM94_06185	AYM02_09125	AYM90_06185	AYM11_08860	AYO24_06240	AYO23_06255	AYM17_03970	AUR58_09945	AYM93_06180	AYO29_05265	AYM38_09015	CBU_1179	MFS transporter	G	orthologs
841	AYN00_05500	AYM00_06365	AYM94_05520	AYM02_06105	AYM90_05595	AYM11_05900	AYO24_06430	AYO23_06440	AYM17_03765	AUR58_06770	AYM93_05515	AYO29_05455	AYM38_06030	CBU_1223	2-dehydro-3-deoxygluconokinase	G	orthologs
881	AYN00_06675	AYM00_06080	AYM94_06695	AYM02_05845	AYM90_06695	AYM11_05655	AYO24_06670	AYO23_06685	AYM17_03515	AUR58_06480	AYM93_06690	AYO29_05700	AYM38_05775	CBU_1273	6-phosphofructokinase	G	orthologs
885	AYN00_06695	AYM00_06060	AYM94_06715	AYM02_05825	AYM90_06715	AYM11_05635	AYO24_06690	AYO23_06705	AYM17_03495	AUR58_06460	AYM93_06710	AYO29_05720	AYM38_05755	CBU_1277	2-dehydro-3-deoxyphosphogluconate aldolase	G	orthologs
901	AYN00_06795	AYM00_05960	AYM94_06815	AYM02_05725	AYM90_06815	AYM11_05535	AYO24_06790	AYO23_06805	AYM17_03395	AUR58_06360	AYM93_06810	AYO29_05820	AYM38_05655	CBU_1296	NAD(+) kinase	G	orthologs
935	AYN00_07075	AYM00_05650	AYM94_07095	AYM02_05420	AYM90_07095	AYM11_05240	AYO24_07070	AYO23_07085	AYM17_03125	AUR58_06055	AYM93_07090	AYO29_06110	AYM38_05355	CBU_1350	phosphoglucosamine mutase	G	orthologs
1009	AYN00_07565	AYM00_04920	AYM94_07585	AYM02_04690	AYM90_07585	AYM11_04520	AYO24_07570	AYO23_07580	AYM17_02635	AUR58_05270	AYM93_07580	AYO29_03745	AYM38_04635	CBU_1450	triose-phosphate isomerase	G	orthologs
1033	AYN00_07745	AYM00_04705	AYM94_07765	AYM02_04505	AYM90_07765	AYM11_04340	AYO24_07755	AYO23_07765	AYM17_02455	AUR58_05045	AYM93_07760	AYO29_08225	AYM38_04445	CBU_1484	MFS transporter	G	orthologs
1061	AYN00_07990	AYM00_04405	AYM94_08010	AYM02_04240	AYM90_08005	AYM11_04095	AYO24_08010	AYO23_08015	AYM17_02230	AUR58_04745	AYM93_08005	AYO29_08595	AYM38_04190	CBU_1536	2,3-bisphosphoglycerate-independent phosphoglycerate mutase	G	orthologs
1153	AYN00_06430	AYM00_03680	AYM94_06305	AYM02_03565	AYM90_06450	AYM11_03435	AYO24_08645	AYO23_08645	AYM17_01660	AUR58_03975	AYM93_06300	AYO29_01640	AYM38_03530	CBU_1674	enolase	G	orthologs
1202	AYN00_08675	AYM00_03280	AYM94_08710	AYM02_03185	AYM90_08695	AYM11_03070	AYO24_09005	AYO23_09005	AYM17_00580	AUR58_03570	AYM93_08705	AYO29_01280	AYM38_03145	CBU_1743	phosphoheptose isomerase	G	orthologs
1213	AYN00_08740	AYM00_01250	AYM94_08775	AYM02_01230	AYM90_08760	AYM11_01190	AYO24_00535	AYO23_00540	AYM17_00645	AUR58_01515	AYM93_08770	AYO29_01215	AYM38_01205	CBU_1756	MFS transporter	G	orthologs
1224	AYN00_08875	AYM00_03095	AYM94_08875	AYM02_03010	AYM90_08890	AYM11_02910	AYO24_09170	AYO23_09170	AYM17_00730	AUR58_03380	AYM93_08870	AYO29_01115	AYM38_02980	CBU_1778	fructose-1,6-bisphosphate aldolase	G	orthologs
1225	AYN00_08770	AYM00_03075	AYM94_08890	AYM02_03000	AYM90_08785	AYM11_02900	AYO24_09180	AYO23_09180	AYM17_00740	AUR58_03360	AYM93_08885	AYO29_00365	AYM38_02970	CBU_1781	pyruvate kinase	G	orthologs
1226	AYN00_08775	AYM00_03070	AYM94_08895	AYM02_02995	AYM90_08790	AYM11_02895	AYO24_09185	AYO23_09185	AYM17_00745	AUR58_03355	AYM93_08890	AYO29_00360	AYM38_02965	CBU_1782	phosphoglycerate kinase	G	orthologs
1227	AYN00_08780	AYM00_03065	AYM94_08900	AYM02_02990	AYM90_08795	AYM11_02890	AYO24_09190	AYO23_09190	AYM17_00750	AUR58_03350	AYM93_08895	AYO29_00355	AYM38_02960	CBU_1783	glyceraldehyde-3-phosphate dehydrogenase	G	orthologs
1228	AYN00_08785	AYM00_03060	AYM94_08905	AYM02_02985	AYM90_08800	AYM11_02885	AYO24_09195	AYO23_09195	AYM17_00755	AUR58_03345	AYM93_08900	AYO29_00350	AYM38_02955	CBU_1784	transketolase	G	orthologs
1230	AYN00_08895	AYM00_03035	AYM94_08925	AYM02_02960	AYM90_08910	AYM11_02865	AYO24_09215	AYO23_09215	AYM17_00780	AUR58_03315	AYM93_08920	AYO29_01030	AYM38_02925	CBU_1789	gluconolactonase	G	orthologs
1285	AYN00_09325	AYM00_02565	AYM94_09350	AYM02_02505	AYM90_09340	AYM11_02420	AYO24_09645	AYO23_09640	AYM17_01170	AUR58_02845	AYM93_09345	AYO29_00720	AYM38_02475	CBU_1872	ribulose phosphate epimerase	G	orthologs
1303	AYN00_09440	AYM00_02445	AYM94_09465	AYM02_02385	AYM90_09455	AYM11_02300	AYO24_09765	AYO23_09755	AYM17_01290	AUR58_02725	AYM93_09460	AYO29_00830	AYM38_02355	CBU_1896	MFS transporter	G	orthologs
1418	AYN00_09795	AYM00_01710	AYM94_10230	AYM02_01685	AYM90_10215	AYM11_01635	AYO24_00105	AYO23_00105	AYM17_10140	AUR58_01980	AYM93_09810	AYO29_10255	AYM38_01660	CBU_2058	MFS transporter	G	orthologs
1420	AYN00_09835	AYM00_01750	AYM94_10270	AYM02_01725	AYM90_10255	AYM11_01675	AYO24_00065	AYO23_00065	AYM17_10180	AUR58_02020	AYM93_09850	AYO29_10285	AYM38_01700	CBU_2067	MFS transporter	G	orthologs
1421	AYN00_09840	AYM00_01755	AYM94_10275	AYM02_01730	AYM90_10260	AYM11_01680	AYO24_00060	AYO23_00060	AYM17_10185	AUR58_02025	AYM93_09855	AYO29_10290	AYM38_01705	CBU_2068	MFS transporter	G	orthologs
513	AYN00_03500	AYM00_07010	AYM94_03500	AYM02_06715	AYM90_03515	AYM11_06500	AYO24_03835	AYO23_03845	AYM17_06355	AUR58_07420	AYM93_03490	AYO29_07555	AYM38_06620	CBU_0703	sugar ABC transporter permease	GM	orthologs
670	AYN00_04675	AYM00_08145	AYM94_04675	AYM02_07835	AYM90_04695	AYM11_07610	AYO24_04720	AYO23_04735	AYM17_05185	AUR58_08585	AYM93_04665	AYO29_04505	AYM38_07735	CBU_0933	ABC transporter permease	GM	orthologs
68	AYN00_00205	AYM00_01205	AYM94_00205	AYM02_01190	AYM90_00210	AYM11_01160	AYO24_00690	AYO23_00695	AYM17_09690	AUR58_01475	AYM93_00200	AYO29_09145	AYM38_01170	CBU_0042	ferrochelatase	H	orthologs
76	AYN00_00260	AYM00_01150	AYM94_00260	AYM02_01135	AYM90_00265	AYM11_01105	AYO24_00635	AYO23_00640	AYM17_09635	AUR58_01420	AYM93_00255	AYO29_09200	AYM38_01115	CBU_0054	chorismate--pyruvate lyase	H	orthologs
77	AYN00_00265	AYM00_01145	AYM94_00265	AYM02_01130	AYM90_00270	AYM11_01100	AYO24_00630	AYO23_00635	AYM17_09630	AUR58_01415	AYM93_00260	AYO29_09205	AYM38_01110	CBU_0055	4-hydroxybenzoate octaprenyltransferase	H	orthologs
84	AYN00_00315	AYM00_01095	AYM94_00315	AYM02_01080	AYM90_00320	AYM11_01050	AYO24_00580	AYO23_00585	AYM17_09580	AUR58_01365	AYM93_00310	AYO29_09250	AYM38_01060	CBU_0066	5-formyltetrahydrofolate cyclo-ligase	H	orthologs
107	AYN00_00475	AYM00_00945	AYM94_00470	AYM02_00925	AYM90_00480	AYM11_00905	AYO24_00830	AYO23_00835	AYM17_09435	AUR58_01215	AYM93_00465	AYO29_09670	AYM38_00910	CBU_0098	nicotinate-nucleotide pyrophosphorylase	H	orthologs
112	AYN00_00510	AYM00_00910	AYM94_00505	AYM02_00890	AYM90_00515	AYM11_00870	AYO24_00865	AYO23_00870	AYM17_09400	AUR58_01180	AYM93_00500	AYO29_09635	AYM38_00875	CBU_0101	L-aspartate oxidase	H	orthologs
118	AYN00_00560	AYM00_00855	AYM94_00555	AYM02_00835	AYM90_00565	AYM11_00820	AYO24_00915	AYO23_00920	AYM17_09350	AUR58_01125	AYM93_00550	AYO29_09585	AYM38_00820	CBU_0111	glycine C-acetyltransferase	H	orthologs
147	AYN00_00755	AYM00_00660	AYM94_00750	AYM02_00640	AYM90_00760	AYM11_00625	AYO24_01110	AYO23_01115	AYM17_09155	AUR58_00930	AYM93_00745	AYO29_09395	AYM38_00625	CBU_0152	dephospho-CoA kinase	H	orthologs
170	AYN00_00995	AYM00_00400	AYM94_00990	AYM02_00390	AYM90_01000	AYM11_00375	AYO24_01350	AYO23_01355	AYM17_08885	AUR58_00675	AYM93_00985	AYO29_02840	AYM38_00380	CBU_0199	pantothenate kinase	H	orthologs
179	AYN00_01095	AYM00_00300	AYM94_01090	AYM02_00290	AYM90_01100	AYM11_00275	AYO24_01450	AYO23_01455	AYM17_08785	AUR58_00560	AYM93_01085	AYO29_02945	AYM38_00280	CBU_0221	phosphopantetheine-protein transferase	H	orthologs
227	AYN00_01375	AYM00_11085	AYM94_01370	AYM02_10715	AYM90_01385	AYM11_10375	AYO24_01730	AYO23_01735	AYM17_08505	AUR58_11610	AYM93_01365	AYO29_03400	AYM38_10555	CBU_0275	uroporphyrinogen decarboxylase	H	orthologs
236	AYN00_01440	AYM00_11020	AYM94_01435	AYM02_10650	AYM90_01450	AYM11_10310	AYO24_01795	AYO23_01800	AYM17_08440	AUR58_11550	AYM93_01430	AYO29_03465	AYM38_10490	CBU_0287	2-amino-4-hydroxy-6- hydroxymethyldihydropteridine pyrophosphokinase	H	orthologs
237	AYN00_01445	AYM00_11015	AYM94_01440	AYM02_10645	AYM90_01455	AYM11_10305	AYO24_01800	AYO23_01805	AYM17_08435	AUR58_11545	AYM93_01435	AYO29_03470	AYM38_10485	CBU_0288	phosphopantetheine adenylyltransferase	H	orthologs
257	AYN00_01560	AYM00_10900	AYM94_01555	AYM02_10530	AYM90_01570	AYM11_10190	AYO24_01915	AYO23_01920	AYM17_08320	AUR58_11430	AYM93_01550	AYO29_03590	AYM38_10370	CBU_0312	bifunctional methylenetetrahydrofolate dehydrogenase/methenyltetrahydrofolate cyclohydrolase	H	orthologs
268	AYN00_01660	AYM00_10790	AYM94_01655	AYM02_10425	AYM90_01670	AYM11_10090	AYO24_02010	AYO23_02015	AYM17_08200	AUR58_11320	AYM93_01650	AYO29_03680	AYM38_10265	CBU_0330	phosphomethylpyrimidine synthase	H	orthologs
270	AYN00_01670	AYM00_10780	AYM94_01665	AYM02_10415	AYM90_01680	AYM11_10080	AYO24_02020	AYO23_02025	AYM17_08190	AUR58_11310	AYM93_01660	AYO29_03690	AYM38_10255	CBU_0332	thiamine biosynthesis protein ThiS	H	orthologs
271	AYN00_01675	AYM00_10775	AYM94_01670	AYM02_10410	AYM90_01685	AYM11_10075	AYO24_02025	AYO23_02030	AYM17_08185	AUR58_11305	AYM93_01665	AYO29_03695	AYM38_10250	CBU_0333	thiazole synthase	H	orthologs
272	AYN00_01680	AYM00_10770	AYM94_01675	AYM02_10405	AYM90_01690	AYM11_10070	AYO24_02030	AYO23_02035	AYM17_08180	AUR58_11300	AYM93_01670	AYO29_03700	AYM38_10245	CBU_0334	thiamine-phosphate pyrophosphorylase	H	orthologs
279	AYN00_01750	AYM00_05080	AYM94_01745	AYM02_04850	AYM90_01760	AYM11_04675	AYO24_02100	AYO23_02105	AYM17_08105	AUR58_05440	AYM93_01740	AYO29_03045	AYM38_04785	CBU_0350	bifunctional 3-demethylubiquinol 3-O-methyltransferase/2-polyprenyl-6-hydroxyphenol methylase	H	orthologs
294	AYN00_01900	AYM00_05230	AYM94_01895	AYM02_05000	AYM90_01915	AYM11_04830	AYO24_02245	AYO23_02255	AYM17_07965	AUR58_05590	AYM93_01890	AYO29_03200	AYM38_04935	CBU_0382	octaprenyl diphosphate synthase	H	orthologs
301	AYN00_01955	AYM00_05285	AYM94_01950	AYM02_05060	AYM90_01970	AYM11_04885	AYO24_02300	AYO23_02305	AYM17_07910	AUR58_05650	AYM93_01945	AYO29_08145	AYM38_04990	CBU_0391	bifunctional riboflavin kinase/FMN adenylyltransferase	H	orthologs
311	AYN00_02090	AYM00_05410	AYM94_02080	AYM02_05190	AYM90_02105	AYM11_05015	AYO24_02430	AYO23_02435	AYM17_07785	AUR58_05790	AYM93_02075	AYO29_08015	AYM38_05125	CBU_0422	aspartate decarboxylase	H	orthologs
312	AYN00_02095	AYM00_05415	AYM94_02085	AYM02_05195	AYM90_02110	AYM11_05020	AYO24_02435	AYO23_02440	AYM17_07780	AUR58_05795	AYM93_02080	AYO29_08010	AYM38_05130	CBU_0423	pantoate--beta-alanine ligase	H	orthologs
313	AYN00_02100	AYM00_05420	AYM94_02090	AYM02_05200	AYM90_02115	AYM11_05025	AYO24_02440	AYO23_02445	AYM17_07775	AUR58_05800	AYM93_02085	AYO29_08005	AYM38_05135	CBU_0424	3-methyl-2-oxobutanoate hydroxymethyltransferase	H	orthologs
341	AYN00_02305	AYM00_10340	AYM94_02295	AYM02_09965	AYM90_02320	AYM11_09660	AYO24_02640	AYO23_02645	AYM17_07570	AUR58_10845	AYM93_02290	AYO29_06920	AYM38_09830	CBU_0467	malonyl-[acyl-carrier protein] O-methyltransferase BioC	H	orthologs
414	AYN00_02765	AYM00_09870	AYM94_02760	AYM02_09485	AYM90_02780	AYM11_09205	AYO24_03100	AYO23_03110	AYM17_07060	AUR58_10350	AYM93_02750	AYO29_06415	AYM38_09365	CBU_0556	nicotinate-nicotinamide nucleotide adenylyltransferase	H	orthologs
440	AYN00_02915	AYM00_09690	AYM94_02910	AYM02_09310	AYM90_02930	AYM11_09035	AYO24_03250	AYO23_03260	AYM17_06910	AUR58_10170	AYM93_02900	AYO29_06260	AYM38_09195	CBU_0588	quinolinate synthetase	H	orthologs
445	AYN00_02965	AYM00_09735	AYM94_02960	AYM02_09355	AYM90_02980	AYM11_09080	AYO24_03295	AYO23_03305	AYM17_06870	AUR58_10215	AYM93_02950	AYO29_06215	AYM38_09240	CBU_0597	YggW family oxidoreductase	H	orthologs
472	AYN00_03150	AYM00_06660	AYM94_03145	AYM02_06370	AYM90_03165	AYM11_06160	AYO24_03485	AYO23_03495	AYM17_06695	AUR58_07070	AYM93_03135	AYO29_07890	AYM38_06305	CBU_0637	pyrroloquinoline quinone biosynthesis protein PqqC	H	orthologs
478	AYN00_03180	AYM00_06690	AYM94_03175	AYM02_06400	AYM90_03195	AYM11_06190	AYO24_03515	AYO23_03525	AYM17_06665	AUR58_07100	AYM93_03165	AYO29_07860	AYM38_06335	CBU_0643	bifunctional diaminohydroxyphosphoribosylaminopyrimidine deaminase/5-amino-6-(5-phosphoribosylamino)uracil reductase	H	orthologs
481	AYN00_03195	AYM00_06705	AYM94_03190	AYM02_06415	AYM90_03210	AYM11_06205	AYO24_03530	AYO23_03540	AYM17_06650	AUR58_07115	AYM93_03180	AYO29_07845	AYM38_06350	CBU_0646	riboflavin synthase subunit alpha	H	orthologs
482	AYN00_03200	AYM00_06710	AYM94_03195	AYM02_06420	AYM90_03215	AYM11_06210	AYO24_03535	AYO23_03545	AYM17_06645	AUR58_07120	AYM93_03185	AYO29_07840	AYM38_06355	CBU_0647	3,4-dihydroxy-2-butanone 4-phosphate synthase	H	orthologs
483	AYN00_03205	AYM00_06715	AYM94_03200	AYM02_06425	AYM90_03220	AYM11_06215	AYO24_03540	AYO23_03550	AYM17_06640	AUR58_07125	AYM93_03190	AYO29_07835	AYM38_06360	CBU_0648	6,7-dimethyl-8-ribityllumazine synthase	H	orthologs
570	AYN00_03980	AYM00_07455	AYM94_03980	AYM02_07155	AYM90_03995	AYM11_06935	AYO24_05420	AYO23_05435	AYM17_05865	AUR58_07890	AYM93_03970	AYO29_02120	AYM38_07055	CBU_0795	GTP cyclohydrolase I	H	orthologs
599	AYN00_04175	AYM00_07655	AYM94_04175	AYM02_07350	AYM90_04190	AYM11_07130	AYO24_05220	AYO23_05235	AYM17_05675	AUR58_08095	AYM93_04165	AYO29_02300	AYM38_07250	CBU_0834	methyltransferase	H	orthologs
620	AYN00_04300	AYM00_07780	AYM94_04300	AYM02_07475	AYM90_04315	AYM11_07255	AYO24_05095	AYO23_05110	AYM17_05550	AUR58_08220	AYM93_04290	AYO29_02425	AYM38_07375	CBU_0858	NAD synthetase	H	orthologs
634	AYN00_04385	AYM00_07865	AYM94_04385	AYM02_07560	AYM90_04400	AYM11_07340	AYO24_05010	AYO23_05025	AYM17_05465	AUR58_08305	AYM93_04375	AYO29_02510	AYM38_07460	CBU_0876	thiamine biosynthesis protein ThiF	H	orthologs
638	AYN00_04435	AYM00_07900	AYM94_04435	AYM02_07595	AYM90_04450	AYM11_07375	AYO24_04960	AYO23_04975	AYM17_05415	AUR58_08340	AYM93_04425	AYO29_02540	AYM38_07495	CBU_0886	phosphopantothenoylcysteine decarboxylase	H	orthologs
645	AYN00_04475	AYM00_07940	AYM94_04475	AYM02_07635	AYM90_04490	AYM11_07415	AYO24_04920	AYO23_04935	AYM17_05375	AUR58_08380	AYM93_04465	AYO29_02580	AYM38_07535	CBU_0894	diaminohydroxyphosphoribosylaminopyrimidine deaminase	H	orthologs
667	AYN00_04650	AYM00_08120	AYM94_04650	AYM02_07810	AYM90_04670	AYM11_07585	AYO24_04745	AYO23_04760	AYM17_05210	AUR58_08560	AYM93_04640	AYO29_04530	AYM38_07710	CBU_0928	pyridoxine 5'-phosphate oxidase	H	orthologs
719	AYN00_05040	AYM00_08530	AYM94_05040	AYM02_08215	AYM90_05060	AYM11_07980	AYO24_04355	AYO23_04370	AYM17_04825	AUR58_08970	AYM93_05030	AYO29_04150	AYM38_08115	CBU_1002	biotin synthase	H	orthologs
720	AYN00_05045	AYM00_08535	AYM94_05045	AYM02_08220	AYM90_05065	AYM11_07985	AYO24_04350	AYO23_04365	AYM17_04820	AUR58_08975	AYM93_05035	AYO29_04145	AYM38_08120	CBU_1003	dethiobiotin synthase	H	orthologs
721	AYN00_05050	AYM00_08540	AYM94_05050	AYM02_08225	AYM90_05070	AYM11_07990	AYO24_04345	AYO23_04360	AYM17_04815	AUR58_08980	AYM93_05040	AYO29_04140	AYM38_08125	CBU_1004	malonyl-[acyl-carrier protein] O-methyltransferase BioC	H	orthologs
723	AYN00_05060	AYM00_08550	AYM94_05060	AYM02_08235	AYM90_05080	AYM11_08000	AYO24_04335	AYO23_04350	AYM17_04805	AUR58_08990	AYM93_05050	AYO29_04130	AYM38_08135	CBU_1006	8-amino-7-oxononanoate synthase	H	orthologs
724	AYN00_05065	AYM00_08555	AYM94_05065	AYM02_08240	AYM90_05085	AYM11_08005	AYO24_04330	AYO23_04345	AYM17_04800	AUR58_08995	AYM93_05055	AYO29_04125	AYM38_08140	CBU_1007	biotin synthase	H	orthologs
725	AYN00_05070	AYM00_08560	AYM94_05070	AYM02_08245	AYM90_05090	AYM11_08010	AYO24_04325	AYO23_04340	AYM17_04795	AUR58_09000	AYM93_05060	AYO29_04120	AYM38_08145	CBU_1008	adenosylmethionine-8-amino-7-oxononanoate aminotransferase	H	orthologs
731	AYN00_05195	AYM00_08700	AYM94_05195	AYM02_08380	AYM90_05215	AYM11_08150	AYO24_04205	AYO23_04220	AYM17_04665	AUR58_09140	AYM93_05185	AYO29_04010	AYM38_08275	CBU_1035	nicotinate phosphoribosyltransferase	H	orthologs
815	AYN00_06175	AYM00_09500	AYM94_06195	AYM02_09135	AYM90_06195	AYM11_08870	AYO24_06250	AYO23_06265	AYM17_03960	AUR58_09955	AYM93_06190	AYO29_05275	AYM38_09025	CBU_1181	thiamine biosynthesis protein ThiI	H	orthologs
866	AYN00_05655	AYM00_06195	AYM94_05675	AYM02_05945	AYM90_05750	AYM11_05745	AYO24_06585	AYO23_06595	AYM17_03610	AUR58_06595	AYM93_05670	AYO29_05615	AYM38_05870	CBU_1255	polyprenyl synthetase	H	orthologs
875	AYN00_05705	AYM00_06135	AYM94_05725	AYM02_05885	AYM90_05800	AYM11_05690	AYO24_06635	AYO23_06650	AYM17_03555	AUR58_06535	AYM93_05720	AYO29_05665	AYM38_05815	CBU_1265	octanoyltransferase	H	orthologs
936	AYN00_07080	AYM00_05645	AYM94_07100	AYM02_05415	AYM90_07100	AYM11_05235	AYO24_07075	AYO23_07090	AYM17_03120	AUR58_06050	AYM93_07095	AYO29_06115	AYM38_05350	CBU_1351	dihydropteroate synthase	H	orthologs
978	AYN00_07380	AYM00_10650	AYM94_07400	AYM02_10290	AYM90_07400	AYM11_09965	AYO24_07380	AYO23_07390	AYM17_02835	AUR58_11170	AYM93_07395	AYO29_07365	AYM38_10140	CBU_1415	thiamine-monophosphate kinase	H	orthologs
985	AYN00_07420	AYM00_10690	AYM94_07440	AYM02_10330	AYM90_07440	AYM11_10005	AYO24_07420	AYO23_07430	AYM17_02795	AUR58_11210	AYM93_07435	AYO29_07410	AYM38_10180	CBU_1424	delta-aminolevulinic acid dehydratase	H	orthologs
1039	AYN00_07795	AYM00_04630	AYM94_07815	AYM02_04445	AYM90_07815	AYM11_04285	AYO24_07810	AYO23_07820	AYM17_02410	AUR58_04965	AYM93_07810	AYO29_08410	AYM38_04390	CBU_1494	pyridoxine 5'-phosphate synthase	H	orthologs
1191	AYN00_08595	AYM00_03365	AYM94_08630	AYM02_03260	AYM90_08615	AYM11_03145	AYO24_08930	AYO23_08930	AYM17_00500	AUR58_03655	AYM93_08625	AYO29_01350	AYM38_03225	CBU_1728	nicotinamide mononucleotide transporter	H	orthologs
1192	AYN00_08600	AYM00_03360	AYM94_08635	AYM02_03255	AYM90_08620	AYM11_03140	AYO24_08935	AYO23_08935	AYM17_00505	AUR58_03650	AYM93_08630	AYO29_01345	AYM38_03220	CBU_1729	coproporphyrinogen III oxidase	H	orthologs
1257	AYN00_09130	AYM00_02775	AYM94_09160	AYM02_02705	AYM90_09145	AYM11_02620	AYO24_09455	AYO23_09455	AYM17_00970	AUR58_03045	AYM93_09155	AYO29_00525	AYM38_02680	CBU_1835	amine oxidase	H	orthologs
1283	AYN00_09315	AYM00_02575	AYM94_09340	AYM02_02515	AYM90_09330	AYM11_02430	AYO24_09635	AYO23_09630	AYM17_01160	AUR58_02855	AYM93_09335	AYO29_00710	AYM38_02485	CBU_1870	2-octaprenyl-3-methyl-6-methoxy-1,4-benzoquinol hydroxylase	H	orthologs
1295	AYN00_09375	AYM00_02510	AYM94_09400	AYM02_02450	AYM90_09390	AYM11_02365	AYO24_09700	AYO23_09690	AYM17_01220	AUR58_02790	AYM93_09395	AYO29_00770	AYM38_02420	CBU_1882	glutamate-1-semialdehyde aminotransferase	H	orthologs
1296	AYN00_09380	AYM00_02505	AYM94_09405	AYM02_02445	AYM90_09395	AYM11_02360	AYO24_09705	AYO23_09695	AYM17_01225	AUR58_02785	AYM93_09400	AYO29_00775	AYM38_02415	CBU_1883	queuosine biosynthesis protein	H	orthologs
1355	AYN00_10310	AYM00_01245	AYM94_09840	AYM02_01225	AYM90_09830	AYM11_01185	AYO24_00540	AYO23_00545	AYM17_09715	AUR58_01510	AYM93_10325	AYO29_09815	AYM38_01200	CBU_1966	glutamyl-tRNA reductase	H	orthologs
1356	AYN00_10320	AYM00_01255	AYM94_09850	AYM02_01235	AYM90_09840	AYM11_01195	AYO24_00530	AYO23_00535	AYM17_09725	AUR58_01520	AYM93_10335	AYO29_09825	AYM38_01210	CBU_1968	diguanylate cyclase	H	orthologs
1368	AYN00_10380	AYM00_01315	AYM94_09910	AYM02_01295	AYM90_09900	AYM11_01255	AYO24_00470	AYO23_00475	AYM17_09785	AUR58_01580	AYM93_10395	AYO29_09885	AYM38_01270	CBU_1981	4-hydroxythreonine-4-phosphate dehydrogenase	H	orthologs
1375	AYN00_09465	AYM00_01365	AYM94_09480	AYM02_01345	AYM90_09470	AYM11_01305	AYO24_00430	AYO23_00435	AYM17_09835	AUR58_01630	AYM93_09475	AYO29_09940	AYM38_01320	CBU_1993	dihydrofolate reductase	H	orthologs
1398	AYN00_09590	AYM00_01500	AYM94_10025	AYM02_01480	AYM90_10010	AYM11_01430	AYO24_00305	AYO23_00305	AYM17_09960	AUR58_01765	AYM93_09605	AYO29_10065	AYM38_01450	CBU_2017	bifunctional demethylmenaquinone methyltransferase/2-methoxy-6-polyprenyl-1,4-benzoquinol methylase	H	orthologs
1407	AYN00_09655	AYM00_01570	AYM94_10090	AYM02_01545	AYM90_10075	AYM11_01495	AYO24_00245	AYO23_00245	AYM17_10020	AUR58_01840	AYM93_09670	AYO29_10130	AYM38_01520	CBU_2030	S-adenosylmethionine synthetase	H	orthologs
1408	AYN00_09660	AYM00_01575	AYM94_10095	AYM02_01550	AYM90_10080	AYM11_01500	AYO24_00240	AYO23_00240	AYM17_10025	AUR58_01845	AYM93_09675	AYO29_10135	AYM38_01525	CBU_2031	adenosylhomocysteinase	H	orthologs
1427	AYN00_09870	AYM00_01795	AYM94_10305	AYM02_01765	AYM90_10290	AYM11_01710	AYO24_00030	AYO23_00030	AYM17_10215	AUR58_02065	AYM93_09885	AYO29_10325	AYM38_01740	CBU_2074	porphobilinogen deaminase	H	orthologs
1430	AYN00_09885	AYM00_01810	AYM94_10320	AYM02_01780	AYM90_10305	AYM11_01725	AYO24_00015	AYO23_00015	AYM17_10230	AUR58_02080	AYM93_09900	AYO29_10340	AYM38_01755	CBU_2077	uroporphyrinogen-III synthase	H	orthologs
1433	AYN00_09900	AYM00_01830	AYM94_10335	AYM02_01795	AYM90_10320	AYM11_01740	AYO24_10265	AYO23_10255	AYM17_10245	AUR58_02105	AYM93_09915	AYO29_10355	AYM38_01770	CBU_2080	hypothetical protein	H	orthologs
1434	AYN00_09905	AYM00_01835	AYM94_10340	AYM02_01800	AYM90_10325	AYM11_01745	AYO24_10260	AYO23_10250	AYM17_10250	AUR58_02110	AYM93_09920	AYO29_10360	AYM38_01775	CBU_2081	heme biosynthesis protein HemY	H	orthologs
88	AYN00_00360	AYM00_01055	AYM94_00360	AYM02_01035	AYM90_00365	AYM11_01015	AYO24_00720	AYO23_00725	AYM17_09545	AUR58_01325	AYM93_00355	AYO29_09780	AYM38_01020	CBU_0075	2-octaprenyl-3-methyl-6-methoxy-1,4-benzoquinol hydroxylase	HC	orthologs
89	AYN00_00365	AYM00_01050	AYM94_00365	AYM02_01030	AYM90_00370	AYM11_01010	AYO24_00725	AYO23_00730	AYM17_09540	AUR58_01320	AYM93_00360	AYO29_09775	AYM38_01015	CBU_0076	ubiquinone biosynthesis protein UbiH	HC	orthologs
390	AYN00_02620	AYM00_10010	AYM94_02615	AYM02_09630	AYM90_02635	AYM11_09345	AYO24_02960	AYO23_02965	AYM17_07200	AUR58_10500	AYM93_02605	AYO29_06565	AYM38_09510	CBU_0525	3-phosphoserine/phosphohydroxythreonine aminotransferase	HE	orthologs
1194	AYN00_08620	AYM00_03330	AYM94_08655	AYM02_03235	AYM90_08640	AYM11_03120	AYO24_08950	AYO23_08950	AYM17_00525	AUR58_03620	AYM93_08650	AYO29_01330	AYM38_03195	CBU_1732	3-phosphoglycerate dehydrogenase	HE	orthologs
1239	AYN00_09010	AYM00_02910	AYM94_09040	AYM02_02830	AYM90_09025	AYM11_02740	AYO24_09335	AYO23_09335	AYM17_00850	AUR58_03185	AYM93_09035	AYO29_00405	AYM38_02800	CBU_1812	erythronate-4-phosphate dehydrogenase	HE	orthologs
1109	AYN00_08300	AYM00_04030	AYM94_08325	AYM02_03900	AYM90_08320	AYM11_03765	AYO24_08320	AYO23_08325	AYM17_01920	AUR58_04340	AYM93_08320	AYO29_08930	AYM38_03855	CBU_1602	ribosomal protein S6 modification protein	HJ	orthologs
1288	AYN00_09340	AYM00_02550	AYM94_09365	AYM02_02490	AYM90_09355	AYM11_02405	AYO24_09660	AYO23_09655	AYM17_01185	AUR58_02830	AYM93_09360	AYO29_00735	AYM38_02460	CBU_1875	glutathione synthetase	HJ	orthologs
57	AYN00_00120	AYM00_02060	AYM94_00125	AYM02_02015	AYM90_00130	AYM11_01940	AYO24_10130	AYO23_10120	AYM17_01400	AUR58_02335	AYM93_00115	AYO29_00940	AYM38_01980	CBU_0027	acyltransferase	I	orthologs
58	AYN00_00135	AYM00_02075	AYM94_00140	AYM02_02030	AYM90_00145	AYM11_01955	AYO24_10115	AYO23_10105	AYM17_01415	AUR58_02350	AYM93_00130	AYO29_00955	AYM38_01995	CBU_0030	hydroxymethylglutaryl-CoA reductase	I	orthologs
63	AYN00_00165	AYM00_02105	AYM94_00170	AYM02_02060	AYM90_00175	AYM11_01985	AYO24_10080	AYO23_10070	AYM17_01445	AUR58_02380	AYM93_00160	AYO29_00985	AYM38_02025	CBU_0036	beta-hydroxyacyl-ACP dehydratase	I	orthologs
64	AYN00_00170	AYM00_02110	AYM94_00175	AYM02_02065	AYM90_00180	AYM11_01990	AYO24_10075	AYO23_10065	AYM17_01450	AUR58_02385	AYM93_00165	AYO29_00990	AYM38_02030	CBU_0037	beta-hydroxydecanoyl-ACP dehydratase	I	orthologs
65	AYN00_00175	AYM00_02115	AYM94_00180	AYM02_02070	AYM90_00185	AYM11_01995	AYO24_10070	AYO23_10060	AYM17_01455	AUR58_02390	AYM93_00170	AYO29_00995	AYM38_02035	CBU_0037a	hypothetical protein	I	orthologs
66	AYN00_00180	AYM00_02120	AYM94_00185	AYM02_02075	AYM90_00190	AYM11_02000	AYO24_10065	AYO23_10055	AYM17_01460	AUR58_02395	AYM93_00175	AYO29_01000	AYM38_02040	CBU_0038	3-oxoacyl-ACP synthase	I	orthologs
105	AYN00_00460	AYM00_00960	AYM94_00455	AYM02_00940	AYM90_00465	AYM11_00920	AYO24_00815	AYO23_00820	AYM17_09450	AUR58_01230	AYM93_00450	AYO29_09685	AYM38_00925	CBU_0096	cardiolipin synthase B	I	orthologs
106	AYN00_00470	AYM00_00950	AYM94_00465	AYM02_00930	AYM90_00475	AYM11_00910	AYO24_00825	AYO23_00830	AYM17_09440	AUR58_01220	AYM93_00460	AYO29_09675	AYM38_00915	CBU_0097	CDP-diacylglycerol--serine O-phosphatidyltransferase	I	orthologs
362	AYN00_02440	AYM00_10205	AYM94_02430	AYM02_09830	AYM90_02455	AYM11_09525	AYO24_02775	AYO23_02780	AYM17_07440	AUR58_10710	AYM93_02425	AYO29_06785	AYM38_09695	CBU_0492	phosphate acyltransferase	I	orthologs
363	AYN00_02445	AYM00_10200	AYM94_02435	AYM02_09825	AYM90_02460	AYM11_09520	AYO24_02780	AYO23_02785	AYM17_07435	AUR58_10705	AYM93_02430	AYO29_06780	AYM38_09690	CBU_0493	3-oxoacyl-ACP synthase	I	orthologs
364	AYN00_02450	AYM00_10195	AYM94_02440	AYM02_09815	AYM90_02465	AYM11_09515	AYO24_02785	AYO23_02790	AYM17_07430	AUR58_10690	AYM93_02435	AYO29_06775	AYM38_09680	CBU_0494	malonyl CoA-ACP transacylase	I	orthologs
427	AYN00_02845	AYM00_09785	AYM94_02840	AYM02_09400	AYM90_02860	AYM11_09120	AYO24_03180	AYO23_03190	AYM17_06980	AUR58_10265	AYM93_02830	AYO29_06330	AYM38_09280	CBU_0573	acyl-CoA dehydrogenase	I	orthologs
428	AYN00_02850	AYM00_09780	AYM94_02845	AYM02_09395	AYM90_02865	AYM11_09115	AYO24_03185	AYO23_03195	AYM17_06975	AUR58_10260	AYM93_02835	AYO29_06325	AYM38_09275	CBU_0574	acetyl-CoA acetyltransferase	I	orthologs
429	AYN00_02855	AYM00_09775	AYM94_02850	AYM02_09390	AYM90_02870	AYM11_09110	AYO24_03190	AYO23_03200	AYM17_06970	AUR58_10255	AYM93_02840	AYO29_06320	AYM38_09270	CBU_0576	crotonase	I	orthologs
446	AYN00_03005	AYM00_09605	AYM94_03000	AYM02_09230	AYM90_03020	AYM11_08960	AYO24_03335	AYO23_03345	AYM17_06840	AUR58_10080	AYM93_02990	AYO29_07160	AYM38_09115	CBU_0607	dihydrofolate reductase	I	orthologs
447	AYN00_03010	AYM00_09600	AYM94_03005	AYM02_09225	AYM90_03025	AYM11_08955	AYO24_03340	AYO23_03350	AYM17_06835	AUR58_10075	AYM93_02995	AYO29_07155	AYM38_09110	CBU_0608	mevalonate kinase	I	orthologs
448	AYN00_03015	AYM00_09595	AYM94_03010	AYM02_09220	AYM90_03030	AYM11_08950	AYO24_03345	AYO23_03355	AYM17_06830	AUR58_10070	AYM93_03000	AYO29_07150	AYM38_09105	CBU_0609	mevalonate kinase	I	orthologs
449	AYN00_03020	AYM00_09590	AYM94_03015	AYM02_09215	AYM90_03035	AYM11_08945	AYO24_03350	AYO23_03360	AYM17_06825	AUR58_10065	AYM93_03005	AYO29_07145	AYM38_09100	CBU_0610	hydroxymethylglutaryl-CoA reductase	I	orthologs
453	AYN00_03040	AYM00_09565	AYM94_03035	AYM02_09195	AYM90_03055	AYM11_08925	AYO24_03370	AYO23_03380	AYM17_06805	AUR58_10035	AYM93_03025	AYO29_07125	AYM38_09080	CBU_0614	3-hydroxyacyl-[acyl-carrier-protein] dehydratase FabZ	I	orthologs
457	AYN00_03060	AYM00_09540	AYM94_03055	AYM02_09175	AYM90_03075	AYM11_08905	AYO24_03390	AYO23_03400	AYM17_06785	AUR58_10000	AYM93_03045	AYO29_07105	AYM38_09060	CBU_0618	acyltransferase	I	orthologs
554	AYN00_03825	AYM00_07300	AYM94_03825	AYM02_07000	AYM90_03840	AYM11_06780	AYO24_05575	AYO23_05590	AYM17_06035	AUR58_07735	AYM93_03815	AYO29_01935	AYM38_06900	CBU_0766	acetoacetyl-CoA synthetase	I	orthologs
644	AYN00_04470	AYM00_07935	AYM94_04470	AYM02_07630	AYM90_04485	AYM11_07410	AYO24_04925	AYO23_04940	AYM17_05380	AUR58_08375	AYM93_04460	AYO29_02575	AYM38_07530	CBU_0893	acetyl-CoA carboxylase subunit beta	I	orthologs
662	AYN00_04610	AYM00_08080	AYM94_04610	AYM02_07770	AYM90_04630	AYM11_07545	AYO24_04785	AYO23_04800	AYM17_05250	AUR58_08520	AYM93_04600	AYO29_04570	AYM38_07670	CBU_0920	fatty acid desaturase	I	orthologs
696	AYN00_04900	AYM00_08375	AYM94_04900	AYM02_08065	AYM90_04920	AYM11_07840	AYO24_04495	AYO23_04510	AYM17_04970	AUR58_08810	AYM93_04890	AYO29_04295	AYM38_07965	CBU_0973	isovaleryl-CoA dehydrogenase	I	orthologs
697	AYN00_04905	AYM00_08380	AYM94_04905	AYM02_08070	AYM90_04925	AYM11_07845	AYO24_04490	AYO23_04505	AYM17_04965	AUR58_08815	AYM93_04895	AYO29_04290	AYM38_07970	CBU_0974	acetyl-CoA acetyltransferase	I	orthologs
698	AYN00_04910	AYM00_08390	AYM94_04910	AYM02_08080	AYM90_04930	AYM11_07850	AYO24_04485	AYO23_04500	AYM17_04960	AUR58_08830	AYM93_04900	AYO29_04285	AYM38_07980	CBU_0975	methylcrotonoyl-CoA carboxylase	I	orthologs
699	AYN00_04915	AYM00_08395	AYM94_04915	AYM02_08085	AYM90_04935	AYM11_07855	AYO24_04480	AYO23_04495	AYM17_04955	AUR58_08835	AYM93_04905	AYO29_04280	AYM38_07985	CBU_0976	enoyl-CoA hydratase	I	orthologs
700	AYN00_04920	AYM00_08400	AYM94_04920	AYM02_08090	AYM90_04940	AYM11_07860	AYO24_04475	AYO23_04490	AYM17_04950	AUR58_08840	AYM93_04910	AYO29_04275	AYM38_07990	CBU_0977	biotin carboxylase	I	orthologs
730	AYN00_05190	AYM00_08695	AYM94_05190	AYM02_08375	AYM90_05210	AYM11_08145	AYO24_04210	AYO23_04225	AYM17_04670	AUR58_09135	AYM93_05180	AYO29_04015	AYM38_08270	CBU_1034	CDP-diacylglycerol--glycerol-3-phosphate 3-phosphatidyltransferase	I	orthologs
818	AYN00_06190	AYM00_09515	AYM94_06210	AYM02_09150	AYM90_06210	AYM11_08885	AYO24_06265	AYO23_06280	AYM17_03945	AUR58_09970	AYM93_06205	AYO29_05290	AYM38_09040	CBU_1184	acyltransferase	I	orthologs
879	AYN00_05730	AYM00_06100	AYM94_05750	AYM02_05855	AYM90_05825	AYM11_05665	AYO24_06660	AYO23_06675	AYM17_03530	AUR58_06500	AYM93_05745	AYO29_05690	AYM38_05785	CBU_1269	acyl-CoA thioesterase	I	orthologs
907	AYN00_06835	AYM00_05910	AYM94_06855	AYM02_05680	AYM90_06855	AYM11_05495	AYO24_06830	AYO23_06845	AYM17_03355	AUR58_06310	AYM93_06850	AYO29_05875	AYM38_05610	CBU_1304	ribosome association toxin RatA	I	orthologs
956	AYN00_07220	AYM00_10480	AYM94_07240	AYM02_10115	AYM90_07240	AYM11_09800	AYO24_07215	AYO23_07230	AYM17_02980	AUR58_10995	AYM93_07235	AYO29_07195	AYM38_09975	CBU_1381	phosphatidate cytidylyltransferase	I	orthologs
957	AYN00_07225	AYM00_10485	AYM94_07245	AYM02_10120	AYM90_07245	AYM11_09805	AYO24_07220	AYO23_07235	AYM17_02975	AUR58_11000	AYM93_07240	AYO29_07200	AYM38_09980	CBU_1382	UDP pyrophosphate synthase	I	orthologs
1049	AYN00_07865	AYM00_04540	AYM94_07885	AYM02_04365	AYM90_07885	AYM11_04215	AYO24_07880	AYO23_07890	AYM17_02340	AUR58_04875	AYM93_07880	AYO29_08480	AYM38_04315	CBU_1510	acetyl-CoA carboxylase subunit alpha	I	orthologs
1188	AYN00_08580	AYM00_03380	AYM94_08615	AYM02_03275	AYM90_08600	AYM11_03160	AYO24_08915	AYO23_08915	AYM17_00485	AUR58_03670	AYM93_08610	AYO29_01365	AYM38_03240	CBU_1725	acetyl-CoA carboxylase biotin carboxyl carrier protein subunit	I	orthologs
1189	AYN00_08585	AYM00_03375	AYM94_08620	AYM02_03270	AYM90_08605	AYM11_03155	AYO24_08920	AYO23_08920	AYM17_00490	AUR58_03665	AYM93_08615	AYO29_01360	AYM38_03235	CBU_1726	acetyl-CoA carboxylase biotin carboxylase subunit	I	orthologs
1233	AYN00_08930	AYM00_02995	AYM94_08960	AYM02_02920	AYM90_08945	AYM11_02825	AYO24_09255	AYO23_09255	AYM17_00810	AUR58_03275	AYM93_08955	AYO29_01070	AYM38_02885	CBU_1797	acyl-CoA thioesterase	I	orthologs
1248	AYN00_09080	AYM00_02830	AYM94_09110	AYM02_02760	AYM90_09095	AYM11_02670	AYO24_09405	AYO23_09405	AYM17_00920	AUR58_03105	AYM93_09105	AYO29_00475	AYM38_02730	CBU_1826	phosphatidylserine decarboxylase	I	orthologs
1275	AYN00_09250	AYM00_02640	AYM94_09280	AYM02_02580	AYM90_09265	AYM11_02495	AYO24_09570	AYO23_09570	AYM17_01090	AUR58_02915	AYM93_09275	AYO29_00645	AYM38_02550	CBU_1856	3-hydroxyisobutyryl-CoA hydrolase	I	orthologs
1426	AYN00_09865	AYM00_01790	AYM94_10300	AYM02_01760	AYM90_10285	AYM11_01705	AYO24_00035	AYO23_00035	AYM17_10210	AUR58_02060	AYM93_09880	AYO29_10320	AYM38_01735	CBU_2073	acyltransferase	I	orthologs
62	AYN00_00160	AYM00_02100	AYM94_00165	AYM02_02055	AYM90_00170	AYM11_01980	AYO24_10085	AYO23_10075	AYM17_01440	AUR58_02375	AYM93_00155	AYO29_00980	AYM38_02020	CBU_0035	beta-ketoacyl-ACP synthase	IQ	orthologs
265	AYN00_01630	AYM00_10830	AYM94_01625	AYM02_10460	AYM90_01640	AYM11_10120	AYO24_01985	AYO23_01990	AYM17_08240	AUR58_11360	AYM93_01620	AYO29_03655	AYM38_10300	CBU_0323	acyl carrier protein	IQ	orthologs
266	AYN00_01635	AYM00_10825	AYM94_01630	AYM02_10455	AYM90_01645	AYM11_10115	AYO24_01990	AYO23_01995	AYM17_08235	AUR58_11355	AYM93_01625	AYO29_03660	AYM38_10295	CBU_0324	acyl-CoA synthetase	IQ	orthologs
366	AYN00_02460	AYM00_10185	AYM94_02450	AYM02_09805	AYM90_02475	AYM11_09505	AYO24_02795	AYO23_02800	AYM17_07420	AUR58_10680	AYM93_02445	AYO29_06765	AYM38_09670	CBU_0496	acyl carrier protein	IQ	orthologs
367	AYN00_02465	AYM00_10180	AYM94_02455	AYM02_09800	AYM90_02480	AYM11_09500	AYO24_02800	AYO23_02805	AYM17_07415	AUR58_10675	AYM93_02450	AYO29_06760	AYM38_09665	CBU_0497	beta-ketoacyl-[acyl-carrier-protein] synthase II	IQ	orthologs
1327	AYN00_10130	AYM00_02305	AYM94_09660	AYM02_02250	AYM90_09650	AYM11_02170	AYO24_09895	AYO23_09885	AYM17_00145	AUR58_02575	AYM93_10145	AYO29_00145	AYM38_02220	CBU_1928	acyl-CoA synthetase	IQ	orthologs
59	AYN00_00140	AYM00_02080	AYM94_00145	AYM02_02035	AYM90_00150	AYM11_01960	AYO24_10110	AYO23_10100	AYM17_01420	AUR58_02355	AYM93_00135	AYO29_00960	AYM38_02000	CBU_0031	short-chain dehydrogenase	IQR	orthologs
365	AYN00_02455	AYM00_10190	AYM94_02445	AYM02_09810	AYM90_02470	AYM11_09510	AYO24_02790	AYO23_02795	AYM17_07425	AUR58_10685	AYM93_02440	AYO29_06770	AYM38_09675	CBU_0495	beta-ketoacyl-ACP reductase	IQR	orthologs
884	AYN00_06690	AYM00_06065	AYM94_06710	AYM02_05830	AYM90_06710	AYM11_05640	AYO24_06685	AYO23_06700	AYM17_03500	AUR58_06465	AYM93_06705	AYO29_05715	AYM38_05760	CBU_1276	short-chain dehydrogenase	IQR	orthologs
91	AYN00_00380	AYM00_01035	AYM94_00380	AYM02_01015	AYM90_00385	AYM11_00995	AYO24_00740	AYO23_00745	AYM17_09525	AUR58_01305	AYM93_00375	AYO29_09760	AYM38_01000	CBU_0081	proline--tRNA ligase	J	orthologs
163	AYN00_00895	AYM00_00520	AYM94_00890	AYM02_00500	AYM90_00900	AYM11_00485	AYO24_01250	AYO23_01255	AYM17_08985	AUR58_00790	AYM93_00885	AYO29_02740	AYM38_00485	CBU_0181	tyrosine--tRNA ligase	J	orthologs
172	AYN00_01015	AYM00_00380	AYM94_01010	AYM02_00370	AYM90_01020	AYM11_00355	AYO24_01370	AYO23_01375	AYM17_08865	AUR58_00655	AYM93_01005	AYO29_02860	AYM38_00360	CBU_0205	glutamate--tRNA ligase	J	orthologs
182	AYN00_01135	AYM00_00265	AYM94_01130	AYM02_00255	AYM90_01140	AYM11_00240	AYO24_01490	AYO23_01495	AYM17_08745	AUR58_00520	AYM93_01125	AYO29_02980	AYM38_00245	CBU_0226	50S ribosomal protein L11	J	orthologs
183	AYN00_01140	AYM00_00260	AYM94_01135	AYM02_00250	AYM90_01145	AYM11_00235	AYO24_01495	AYO23_01500	AYM17_08740	AUR58_00515	AYM93_01130	AYO29_02985	AYM38_00240	CBU_0227	50S ribosomal protein L1	J	orthologs
184	AYN00_01145	AYM00_00255	AYM94_01140	AYM02_00245	AYM90_01150	AYM11_00230	AYO24_01500	AYO23_01505	AYM17_08735	AUR58_00510	AYM93_01135	AYO29_02990	AYM38_00235	CBU_0228	50S ribosomal protein L10	J	orthologs
185	AYN00_01150	AYM00_00250	AYM94_01145	AYM02_00240	AYM90_01155	AYM11_00225	AYO24_01505	AYO23_01510	AYM17_08730	AUR58_00505	AYM93_01140	AYO29_02995	AYM38_00230	CBU_0229	50S ribosomal protein L7/L12	J	orthologs
189	AYN00_01170	AYM00_00225	AYM94_01165	AYM02_00220	AYM90_01180	AYM11_00205	AYO24_01525	AYO23_01530	AYM17_08710	AUR58_00475	AYM93_01160	AYO29_00325	AYM38_00210	CBU_0233	30S ribosomal protein S12	J	orthologs
190	AYN00_01175	AYM00_00220	AYM94_01170	AYM02_00215	AYM90_01185	AYM11_00200	AYO24_01530	AYO23_01535	AYM17_08705	AUR58_00470	AYM93_01165	AYO29_00330	AYM38_00205	CBU_0234	30S ribosomal protein S7	J	orthologs
191	AYN00_01180	AYM00_00215	AYM94_01175	AYM02_00210	AYM90_01190	AYM11_00195	AYO24_01535	AYO23_01540	AYM17_08700	AUR58_00465	AYM93_01170	AYO29_00335	AYM38_00200	CBU_0235	elongation factor G	J	orthologs
192	AYN00_01115	AYM00_00210	AYM94_01110	AYM02_00205	AYM90_01120	AYM11_00190	AYO24_01470	AYO23_01475	AYM17_08765	AUR58_00540	AYM93_01105	AYO29_03210	AYM38_00195	CBU_0236	elongation factor Tu	J	orthologs
193	AYN00_01185	AYM00_00205	AYM94_01180	AYM02_00200	AYM90_01195	AYM11_00185	AYO24_01540	AYO23_01545	AYM17_08690	AUR58_00455	AYM93_01175	AYO29_03215	AYM38_00190	CBU_0237	30S ribosomal protein S10	J	orthologs
194	AYN00_01190	AYM00_00200	AYM94_01185	AYM02_00195	AYM90_01200	AYM11_00180	AYO24_01545	AYO23_01550	AYM17_08685	AUR58_00450	AYM93_01180	AYO29_03220	AYM38_00185	CBU_0238	50S ribosomal protein L3	J	orthologs
195	AYN00_01195	AYM00_00195	AYM94_01190	AYM02_00190	AYM90_01205	AYM11_00175	AYO24_01550	AYO23_01555	AYM17_08680	AUR58_00445	AYM93_01185	AYO29_03225	AYM38_00180	CBU_0239	50S ribosomal protein L4	J	orthologs
196	AYN00_01200	AYM00_00190	AYM94_01195	AYM02_00185	AYM90_01210	AYM11_00170	AYO24_01555	AYO23_01560	AYM17_08675	AUR58_00440	AYM93_01190	AYO29_03230	AYM38_00175	CBU_0240	50S ribosomal protein L23	J	orthologs
197	AYN00_01205	AYM00_00185	AYM94_01200	AYM02_00180	AYM90_01215	AYM11_00165	AYO24_01560	AYO23_01565	AYM17_08670	AUR58_00435	AYM93_01195	AYO29_03235	AYM38_00170	CBU_0241	50S ribosomal protein L2	J	orthologs
198	AYN00_01210	AYM00_00180	AYM94_01205	AYM02_00175	AYM90_01220	AYM11_00160	AYO24_01565	AYO23_01570	AYM17_08665	AUR58_00430	AYM93_01200	AYO29_03240	AYM38_00165	CBU_0242	30S ribosomal protein S19	J	orthologs
199	AYN00_01215	AYM00_00175	AYM94_01210	AYM02_00170	AYM90_01225	AYM11_00155	AYO24_01570	AYO23_01575	AYM17_08660	AUR58_00425	AYM93_01205	AYO29_03245	AYM38_00160	CBU_0243	50S ribosomal protein L22	J	orthologs
200	AYN00_01220	AYM00_00170	AYM94_01215	AYM02_00165	AYM90_01230	AYM11_00150	AYO24_01575	AYO23_01580	AYM17_08655	AUR58_00420	AYM93_01210	AYO29_03250	AYM38_00155	CBU_0244	30S ribosomal protein S3	J	orthologs
201	AYN00_01225	AYM00_00165	AYM94_01220	AYM02_00160	AYM90_01235	AYM11_00145	AYO24_01580	AYO23_01585	AYM17_08650	AUR58_00415	AYM93_01215	AYO29_03255	AYM38_00150	CBU_0245	50S ribosomal protein L16	J	orthologs
202	AYN00_01230	AYM00_00160	AYM94_01225	AYM02_00155	AYM90_01240	AYM11_00140	AYO24_01585	AYO23_01590	AYM17_08645	AUR58_00410	AYM93_01220	AYO29_03260	AYM38_00145	CBU_0246	50S ribosomal protein L29	J	orthologs
203	AYN00_01235	AYM00_00155	AYM94_01230	AYM02_00150	AYM90_01245	AYM11_00135	AYO24_01590	AYO23_01595	AYM17_08640	AUR58_00405	AYM93_01225	AYO29_03265	AYM38_00140	CBU_0247	30S ribosomal protein S17	J	orthologs
204	AYN00_01240	AYM00_00150	AYM94_01235	AYM02_00145	AYM90_01250	AYM11_00130	AYO24_01595	AYO23_01600	AYM17_08635	AUR58_00400	AYM93_01230	AYO29_03270	AYM38_00135	CBU_0248	50S ribosomal protein L14	J	orthologs
205	AYN00_01245	AYM00_00145	AYM94_01240	AYM02_00140	AYM90_01255	AYM11_00125	AYO24_01600	AYO23_01605	AYM17_08630	AUR58_00395	AYM93_01235	AYO29_03275	AYM38_00130	CBU_0249	50S ribosomal protein L24	J	orthologs
206	AYN00_01250	AYM00_00140	AYM94_01245	AYM02_00135	AYM90_01260	AYM11_00120	AYO24_01605	AYO23_01610	AYM17_08625	AUR58_00390	AYM93_01240	AYO29_03280	AYM38_00125	CBU_0250	50S ribosomal protein L5	J	orthologs
207	AYN00_01255	AYM00_00135	AYM94_01250	AYM02_00130	AYM90_01265	AYM11_00115	AYO24_01610	AYO23_01615	AYM17_08620	AUR58_00385	AYM93_01245	AYO29_03285	AYM38_00120	CBU_0251	30S ribosomal protein S14	J	orthologs
208	AYN00_01260	AYM00_00130	AYM94_01255	AYM02_00125	AYM90_01270	AYM11_00110	AYO24_01615	AYO23_01620	AYM17_08615	AUR58_00380	AYM93_01250	AYO29_03290	AYM38_00115	CBU_0252	30S ribosomal protein S8	J	orthologs
209	AYN00_01265	AYM00_00125	AYM94_01260	AYM02_00120	AYM90_01275	AYM11_00105	AYO24_01620	AYO23_01625	AYM17_08610	AUR58_00375	AYM93_01255	AYO29_03295	AYM38_00110	CBU_0253	50S ribosomal protein L6	J	orthologs
210	AYN00_01270	AYM00_00120	AYM94_01265	AYM02_00115	AYM90_01280	AYM11_00100	AYO24_01625	AYO23_01630	AYM17_08605	AUR58_00370	AYM93_01260	AYO29_03300	AYM38_00105	CBU_0254	50S ribosomal protein L18	J	orthologs
211	AYN00_01275	AYM00_00115	AYM94_01270	AYM02_00110	AYM90_01285	AYM11_00095	AYO24_01630	AYO23_01635	AYM17_08600	AUR58_00365	AYM93_01265	AYO29_03305	AYM38_00100	CBU_0255	30S ribosomal protein S5	J	orthologs
212	AYN00_01280	AYM00_00110	AYM94_01275	AYM02_00105	AYM90_01290	AYM11_00090	AYO24_01635	AYO23_01640	AYM17_08595	AUR58_00360	AYM93_01270	AYO29_03310	AYM38_00095	CBU_0256	50S ribosomal protein L30	J	orthologs
213	AYN00_01285	AYM00_00105	AYM94_01280	AYM02_00100	AYM90_01295	AYM11_00085	AYO24_01640	AYO23_01645	AYM17_08590	AUR58_00355	AYM93_01275	AYO29_03315	AYM38_00090	CBU_0257	50S ribosomal protein L15	J	orthologs
216	AYN00_01300	AYM00_00090	AYM94_01295	AYM02_00085	AYM90_01310	AYM11_00070	AYO24_01655	AYO23_01660	AYM17_08575	AUR58_00340	AYM93_01290	AYO29_03330	AYM38_00075	CBU_0260	30S ribosomal protein S13	J	orthologs
217	AYN00_01305	AYM00_00085	AYM94_01300	AYM02_00080	AYM90_01315	AYM11_00065	AYO24_01660	AYO23_01665	AYM17_08570	AUR58_00335	AYM93_01295	AYO29_03335	AYM38_00070	CBU_0261	30S ribosomal protein S11	J	orthologs
218	AYN00_01310	AYM00_00080	AYM94_01305	AYM02_00075	AYM90_01320	AYM11_00060	AYO24_01665	AYO23_01670	AYM17_08565	AUR58_00330	AYM93_01300	AYO29_03340	AYM38_00065	CBU_0262	30S ribosomal protein S4	J	orthologs
220	AYN00_01320	AYM00_00070	AYM94_01315	AYM02_00065	AYM90_01330	AYM11_00050	AYO24_01675	AYO23_01680	AYM17_08555	AUR58_00320	AYM93_01310	AYO29_03350	AYM38_00055	CBU_0264	50S ribosomal protein L17	J	orthologs
235	AYN00_01435	AYM00_11025	AYM94_01430	AYM02_10655	AYM90_01445	AYM11_10315	AYO24_01790	AYO23_01795	AYM17_08445	AUR58_11555	AYM93_01425	AYO29_03460	AYM38_10495	CBU_0286	hypothetical protein	J	orthologs
240	AYN00_01460	AYM00_11000	AYM94_01455	AYM02_10630	AYM90_01470	AYM11_10290	AYO24_01815	AYO23_01820	AYM17_08420	AUR58_11530	AYM93_01450	AYO29_03485	AYM38_10470	CBU_0291	50S ribosomal protein L28	J	orthologs
246	AYN00_01500	AYM00_10960	AYM94_01495	AYM02_10590	AYM90_01510	AYM11_10250	AYO24_01855	AYO23_01860	AYM17_08380	AUR58_11490	AYM93_01490	AYO29_03530	AYM38_10430	CBU_0299	ribonuclease PH	J	orthologs
251	AYN00_01525	AYM00_10935	AYM94_01520	AYM02_10565	AYM90_01535	AYM11_10225	AYO24_01880	AYO23_01885	AYM17_08355	AUR58_11465	AYM93_01515	AYO29_03555	AYM38_10405	CBU_0304	reactive intermediate/imine deaminase	J	orthologs
296	AYN00_01920	AYM00_05250	AYM94_01915	AYM02_05025	AYM90_01935	AYM11_04850	AYO24_02265	AYO23_02270	AYM17_07945	AUR58_05615	AYM93_01910	AYO29_08185	AYM38_04955	CBU_0385	50S ribosomal protein L21	J	orthologs
297	AYN00_01925	AYM00_05255	AYM94_01920	AYM02_05030	AYM90_01940	AYM11_04855	AYO24_02270	AYO23_02275	AYM17_07940	AUR58_05620	AYM93_01915	AYO29_08180	AYM38_04960	CBU_0386	50S ribosomal protein L27	J	orthologs
299	AYN00_01945	AYM00_05275	AYM94_01940	AYM02_05050	AYM90_01960	AYM11_04875	AYO24_02290	AYO23_02295	AYM17_07920	AUR58_05640	AYM93_01935	AYO29_08155	AYM38_04980	CBU_0389	30S ribosomal protein S20	J	orthologs
302	AYN00_01975	AYM00_05305	AYM94_01970	AYM02_05080	AYM90_01990	AYM11_04905	AYO24_02320	AYO23_02325	AYM17_07895	AUR58_05670	AYM93_01965	AYO29_08125	AYM38_05010	CBU_0396	isoleucine--tRNA ligase	J	orthologs
315	AYN00_02130	AYM00_05450	AYM94_02120	AYM02_05230	AYM90_02145	AYM11_05055	AYO24_02465	AYO23_02470	AYM17_07745	AUR58_05830	AYM93_02115	AYO29_07095	AYM38_05165	CBU_0430	lysine--tRNA ligase	J	orthologs
321	AYN00_02190	AYM00_05515	AYM94_02180	AYM02_05290	AYM90_02205	AYM11_05115	AYO24_02525	AYO23_02530	AYM17_07685	AUR58_05900	AYM93_02175	AYO29_07035	AYM38_05230	CBU_0442	50S ribosomal protein L19	J	orthologs
322	AYN00_02195	AYM00_05520	AYM94_02185	AYM02_05295	AYM90_02210	AYM11_05120	AYO24_02530	AYO23_02535	AYM17_07680	AUR58_05905	AYM93_02180	AYO29_07030	AYM38_05235	CBU_0443	tRNA (guanine-N1)-methyltransferase	J	orthologs
323	AYN00_02200	AYM00_05525	AYM94_02190	AYM02_05300	AYM90_02215	AYM11_05125	AYO24_02535	AYO23_02540	AYM17_07675	AUR58_05910	AYM93_02185	AYO29_07025	AYM38_05240	CBU_0444	ribosome maturation factor RimM	J	orthologs
324	AYN00_02205	AYM00_05530	AYM94_02195	AYM02_05305	AYM90_02220	AYM11_05130	AYO24_02540	AYO23_02545	AYM17_07670	AUR58_05915	AYM93_02190	AYO29_07020	AYM38_05245	CBU_0445	30S ribosomal protein S16	J	orthologs
356	AYN00_02410	AYM00_10235	AYM94_02400	AYM02_09860	AYM90_02425	AYM11_09555	AYO24_02745	AYO23_02750	AYM17_07470	AUR58_10740	AYM93_02395	AYO29_06815	AYM38_09725	CBU_0486	hypothetical protein	J	orthologs
357	AYN00_02415	AYM00_10230	AYM94_02405	AYM02_09855	AYM90_02430	AYM11_09550	AYO24_02750	AYO23_02755	AYM17_07465	AUR58_10735	AYM93_02400	AYO29_06810	AYM38_09720	CBU_0487	23S rRNA pseudouridylate synthase	J	orthologs
361	AYN00_02435	AYM00_10210	AYM94_02425	AYM02_09835	AYM90_02450	AYM11_09530	AYO24_02770	AYO23_02775	AYM17_07445	AUR58_10715	AYM93_02420	AYO29_06790	AYM38_09700	CBU_0491	50S ribosomal protein L32	J	orthologs
374	AYN00_02505	AYM00_10135	AYM94_02495	AYM02_09750	AYM90_02520	AYM11_09460	AYO24_02845	AYO23_02850	AYM17_07375	AUR58_10625	AYM93_02490	AYO29_06720	AYM38_09625	CBU_0505	acetyltransferase	J	orthologs
393	AYN00_02635	AYM00_09995	AYM94_02630	AYM02_09615	AYM90_02650	AYM11_09330	AYO24_02975	AYO23_02980	AYM17_07185	AUR58_10485	AYM93_02620	AYO29_06550	AYM38_09495	CBU_0528	30S ribosomal protein S1	J	orthologs
417	AYN00_02780	AYM00_09855	AYM94_02775	AYM02_09470	AYM90_02795	AYM11_09190	AYO24_03115	AYO23_03125	AYM17_07045	AUR58_10335	AYM93_02765	AYO29_06400	AYM38_09350	CBU_0559	leucine--tRNA ligase	J	orthologs
424	AYN00_02825	AYM00_09805	AYM94_02820	AYM02_09420	AYM90_02840	AYM11_09140	AYO24_03160	AYO23_03170	AYM17_07000	AUR58_10285	AYM93_02810	AYO29_06350	AYM38_09300	CBU_0569	tRNA-2-methylthio-N(6)-dimethylallyladenosine synthase MiaB	J	orthologs
538	AYN00_03715	AYM00_08935	AYM94_03715	AYM02_08600	AYM90_03730	AYM11_08360	AYO24_05685	AYO23_05700	AYM17_06145	AUR58_09375	AYM93_03705	AYO29_01820	AYM38_08495	CBU_0745	ribosomal subunit interface protein	J	orthologs
549	AYN00_03775	AYM00_08865	AYM94_03775	AYM02_08535	AYM90_03790	AYM11_08300	AYO24_05625	AYO23_05640	AYM17_06085	AUR58_09305	AYM93_03765	AYO29_01885	AYM38_08435	CBU_0757	RNA pseudouridine synthase	J	orthologs
581	AYN00_04045	AYM00_07520	AYM94_04045	AYM02_07220	AYM90_04060	AYM11_07000	AYO24_05355	AYO23_05370	AYM17_05800	AUR58_07955	AYM93_04035	AYO29_02185	AYM38_07120	CBU_0808	valine--tRNA ligase	J	orthologs
584	AYN00_04060	AYM00_07535	AYM94_04060	AYM02_07235	AYM90_04075	AYM11_07015	AYO24_05340	AYO23_05355	AYM17_05785	AUR58_07970	AYM93_04050	AYO29_02200	AYM38_07135	CBU_0811	peptide chain release factor 3	J	orthologs
614	AYN00_04260	AYM00_07740	AYM94_04260	AYM02_07435	AYM90_04275	AYM11_07215	AYO24_05135	AYO23_05150	AYM17_05590	AUR58_08180	AYM93_04250	AYO29_02385	AYM38_07335	CBU_0851	30S ribosomal protein S15	J	orthologs
615	AYN00_04265	AYM00_07745	AYM94_04265	AYM02_07440	AYM90_04280	AYM11_07220	AYO24_05130	AYO23_05145	AYM17_05585	AUR58_08185	AYM93_04255	AYO29_02390	AYM38_07340	CBU_0852	polyribonucleotide nucleotidyltransferase	J	orthologs
623	AYN00_04325	AYM00_07805	AYM94_04325	AYM02_07500	AYM90_04340	AYM11_07280	AYO24_05070	AYO23_05085	AYM17_05525	AUR58_08245	AYM93_04315	AYO29_02450	AYM38_07400	CBU_0864	30S ribosomal protein S6	J	orthologs
624	AYN00_04330	AYM00_07810	AYM94_04330	AYM02_07505	AYM90_04345	AYM11_07285	AYO24_05065	AYO23_05080	AYM17_05520	AUR58_08250	AYM93_04320	AYO29_02455	AYM38_07405	CBU_0865	30S ribosomal protein S18	J	orthologs
626	AYN00_04340	AYM00_07820	AYM94_04340	AYM02_07515	AYM90_04355	AYM11_07295	AYO24_05055	AYO23_05070	AYM17_05510	AUR58_08260	AYM93_04330	AYO29_02465	AYM38_07415	CBU_0867	50S ribosomal protein L9	J	orthologs
643	AYN00_04465	AYM00_07930	AYM94_04465	AYM02_07625	AYM90_04480	AYM11_07405	AYO24_04930	AYO23_04945	AYM17_05385	AUR58_08370	AYM93_04455	AYO29_02570	AYM38_07525	CBU_0892	pseudouridine synthase	J	orthologs
650	AYN00_04525	AYM00_07990	AYM94_04525	AYM02_07685	AYM90_04545	AYM11_07465	AYO24_04870	AYO23_04885	AYM17_05330	AUR58_08430	AYM93_04515	AYO29_02630	AYM38_07585	CBU_0904	tRNA dihydrouridine synthase DusA	J	orthologs
651	AYN00_04530	AYM00_07995	AYM94_04530	AYM02_07690	AYM90_04550	AYM11_07470	AYO24_04865	AYO23_04880	AYM17_05325	AUR58_08435	AYM93_04520	AYO29_02640	AYM38_07590	CBU_0905	50S ribosomal protein L31	J	orthologs
654	AYN00_04550	AYM00_08015	AYM94_04550	AYM02_07710	AYM90_04570	AYM11_07490	AYO24_04845	AYO23_04860	AYM17_05300	AUR58_08455	AYM93_04540	AYO29_02665	AYM38_07610	CBU_0909	threonylcarbamoyl-AMP synthase	J	orthologs
708	AYN00_04965	AYM00_08445	AYM94_04965	AYM02_08135	AYM90_04985	AYM11_07905	AYO24_04430	AYO23_04445	AYM17_04900	AUR58_08885	AYM93_04955	AYO29_04225	AYM38_08035	CBU_0986	23S rRNA methyltransferase	J	orthologs
741	AYN00_05285	AYM00_08800	AYM94_05290	AYM02_08480	AYM90_05305	AYM11_08245	AYO24_04115	AYO23_04130	AYM17_04555	AUR58_09240	AYM93_05280	AYO29_03910	AYM38_08375	CBU_1052	alanine--tRNA ligase	J	orthologs
747	AYN00_05320	AYM00_08835	AYM94_05325	AYM02_08515	AYM90_05340	AYM11_08280	AYO24_04080	AYO23_04095	AYM17_04520	AUR58_09275	AYM93_05315	AYO29_03875	AYM38_08410	CBU_1059	pseudouridine synthase	J	orthologs
751	AYN00_05350	AYM00_07240	AYM94_05355	AYM02_06935	AYM90_05370	AYM11_06720	AYO24_04050	AYO23_04065	AYM17_04490	AUR58_07665	AYM93_05345	AYO29_04650	AYM38_06840	CBU_1065	2'-5' RNA ligase	J	orthologs
754	AYN00_05390	AYM00_07200	AYM94_05395	AYM02_06895	AYM90_05410	AYM11_06680	AYO24_04010	AYO23_04025	AYM17_04455	AUR58_07625	AYM93_05385	AYO29_04690	AYM38_06800	CBU_1072	tRNA-guanine(34) transglycosylase	J	orthologs
762	AYN00_05440	AYM00_07140	AYM94_05465	AYM02_06845	AYM90_05460	AYM11_06630	AYO24_03965	AYO23_03980	AYM17_04410	AUR58_07560	AYM93_05460	AYO29_04800	AYM38_06750	CBU_1082	tRNA (adenosine(37)-N6)-dimethylallyltransferase MiaA	J	orthologs
789	AYN00_05920	AYM00_09230	AYM94_05940	AYM02_08875	AYM90_05940	AYM11_08620	AYO24_06000	AYO23_06015	AYM17_04200	AUR58_09685	AYM93_05935	AYO29_05025	AYM38_08765	CBU_1131	RNA methyltransferase	J	orthologs
801	AYN00_06010	AYM00_09340	AYM94_06030	AYM02_08975	AYM90_06030	AYM11_08710	AYO24_06090	AYO23_06105	AYM17_04115	AUR58_09795	AYM93_06025	AYO29_05110	AYM38_08865	CBU_1147	tRNA 2-thiouridine(34) synthase MnmA	J	orthologs
821	AYN00_06215	AYM00_06545	AYM94_06545	AYM02_06265	AYM90_06235	AYM11_06065	AYO24_06290	AYO23_06305	AYM17_03925	AUR58_06955	AYM93_06540	AYO29_05315	AYM38_06195	CBU_1188	serine--tRNA ligase	J	orthologs
826	AYN00_06245	AYM00_06515	AYM94_06575	AYM02_06235	AYM90_06265	AYM11_06035	AYO24_06320	AYO23_06335	AYM17_03895	AUR58_06925	AYM93_06570	AYO29_05345	AYM38_06165	CBU_1195	translation initiation factor IF-1	J	orthologs
832	AYN00_06275	AYM00_06485	AYM94_06605	AYM02_06205	AYM90_06295	AYM11_06005	AYO24_06350	AYO23_06365	AYM17_03865	AUR58_06895	AYM93_06600	AYO29_05375	AYM38_06135	CBU_1201	S-adenosylmethionine:tRNA ribosyltransferase-isomerase	J	orthologs
862	AYN00_05620	AYM00_06230	AYM94_05640	AYM02_05980	AYM90_05715	AYM11_05780	AYO24_06550	AYO23_06560	AYM17_03645	AUR58_06630	AYM93_05635	AYO29_05580	AYM38_05905	CBU_1248	histidine--tRNA ligase	J	orthologs
905	AYN00_06825	AYM00_05920	AYM94_06845	AYM02_05690	AYM90_06845	AYM11_05505	AYO24_06820	AYO23_06835	AYM17_03365	AUR58_06320	AYM93_06840	AYO29_05865	AYM38_05620	CBU_1302	hypothetical protein	J	orthologs
917	AYN00_06935	AYM00_05810	AYM94_06955	AYM02_05580	AYM90_06955	AYM11_05395	AYO24_06930	AYO23_06945	AYM17_03265	AUR58_06215	AYM93_06950	AYO29_05970	AYM38_05510	CBU_1321	phenylalanine--tRNA ligase subunit beta	J	orthologs
918	AYN00_06940	AYM00_05805	AYM94_06960	AYM02_05575	AYM90_06960	AYM11_05390	AYO24_06935	AYO23_06950	AYM17_03260	AUR58_06210	AYM93_06955	AYO29_05975	AYM38_05505	CBU_1322	phenylalanine--tRNA ligase subunit alpha	J	orthologs
919	AYN00_06945	AYM00_05800	AYM94_06965	AYM02_05570	AYM90_06965	AYM11_05385	AYO24_06940	AYO23_06955	AYM17_03255	AUR58_06205	AYM93_06960	AYO29_05980	AYM38_05500	CBU_1323	50S ribosomal protein L20	J	orthologs
921	AYN00_06955	AYM00_05790	AYM94_06975	AYM02_05560	AYM90_06975	AYM11_05375	AYO24_06950	AYO23_06965	AYM17_03245	AUR58_06195	AYM93_06970	AYO29_05990	AYM38_05490	CBU_1324	50S ribosomal protein L35	J	orthologs
922	AYN00_06960	AYM00_05785	AYM94_06980	AYM02_05555	AYM90_06980	AYM11_05370	AYO24_06955	AYO23_06970	AYM17_03240	AUR58_06190	AYM93_06975	AYO29_05995	AYM38_05485	CBU_1325	translation initiation factor IF-3	J	orthologs
923	AYN00_06965	AYM00_05780	AYM94_06985	AYM02_05550	AYM90_06985	AYM11_05365	AYO24_06960	AYO23_06975	AYM17_03235	AUR58_06185	AYM93_06980	AYO29_06000	AYM38_05480	CBU_1326	threonine--tRNA ligase	J	orthologs
938	AYN00_07090	AYM00_05635	AYM94_07110	AYM02_05405	AYM90_07110	AYM11_05225	AYO24_07085	AYO23_07100	AYM17_03110	AUR58_06040	AYM93_07105	AYO29_06125	AYM38_05340	CBU_1353	23S rRNA methyltransferase	J	orthologs
958	AYN00_07230	AYM00_10490	AYM94_07250	AYM02_10125	AYM90_07250	AYM11_09810	AYO24_07225	AYO23_07240	AYM17_02970	AUR58_11005	AYM93_07245	AYO29_07205	AYM38_09985	CBU_1383	ribosome recycling factor	J	orthologs
960	AYN00_07240	AYM00_10500	AYM94_07260	AYM02_10135	AYM90_07260	AYM11_09820	AYO24_07235	AYO23_07250	AYM17_02960	AUR58_11015	AYM93_07255	AYO29_07215	AYM38_09995	CBU_1385	elongation factor Ts	J	orthologs
961	AYN00_07245	AYM00_10505	AYM94_07265	AYM02_10140	AYM90_07265	AYM11_09825	AYO24_07240	AYO23_07255	AYM17_02955	AUR58_11020	AYM93_07260	AYO29_07220	AYM38_10000	CBU_1386	30S ribosomal protein S2	J	orthologs
963	AYN00_07255	AYM00_10515	AYM94_07275	AYM02_10150	AYM90_07275	AYM11_09835	AYO24_07250	AYO23_07265	AYM17_02945	AUR58_11030	AYM93_07270	AYO29_07230	AYM38_10010	CBU_1388	methionine aminopeptidase	J	orthologs
989	AYN00_07455	AYM00_05030	AYM94_07475	AYM02_04800	AYM90_07475	AYM11_04630	AYO24_07460	AYO23_07470	AYM17_02745	AUR58_05380	AYM93_07470	AYO29_03855	AYM38_04740	CBU_1430	tRNA pseudouridine synthase B	J	orthologs
990	AYN00_07460	AYM00_05025	AYM94_07480	AYM02_04795	AYM90_07480	AYM11_04625	AYO24_07465	AYO23_07475	AYM17_02740	AUR58_05375	AYM93_07475	AYO29_03850	AYM38_04735	CBU_1431	ribosome-binding factor A	J	orthologs
991	AYN00_07465	AYM00_05020	AYM94_07485	AYM02_04790	AYM90_07485	AYM11_04620	AYO24_07470	AYO23_07480	AYM17_02735	AUR58_05370	AYM93_07480	AYO29_03845	AYM38_04730	CBU_1432	translation initiation factor IF-2	J	orthologs
1024	AYN00_07690	AYM00_04785	AYM94_07710	AYM02_04565	AYM90_07710	AYM11_04395	AYO24_07700	AYO23_07710	AYM17_02510	AUR58_05135	AYM93_07705	AYO29_08380	AYM38_04510	CBU_1473	glutamyl-tRNA amidotransferase	J	orthologs
1025	AYN00_07695	AYM00_04780	AYM94_07715	AYM02_04560	AYM90_07715	AYM11_04390	AYO24_07705	AYO23_07715	AYM17_02505	AUR58_05130	AYM93_07710	AYO29_08385	AYM38_04505	CBU_1474	glutamyl-tRNA amidotransferase	J	orthologs
1026	AYN00_07700	AYM00_04775	AYM94_07720	AYM02_04555	AYM90_07720	AYM11_04385	AYO24_07710	AYO23_07720	AYM17_02500	AUR58_05125	AYM93_07715	AYO29_08390	AYM38_04500	CBU_1475	glutamyl-tRNA amidotransferase	J	orthologs
1034	AYN00_07760	AYM00_04685	AYM94_07780	AYM02_04490	AYM90_07780	AYM11_04325	AYO24_07770	AYO23_07780	AYM17_02440	AUR58_05025	AYM93_07775	AYO29_08240	AYM38_04435	CBU_1487	cysteine--tRNA ligase	J	orthologs
1035	AYN00_07765	AYM00_04680	AYM94_07785	AYM02_04485	AYM90_07785	AYM11_04320	AYO24_07775	AYO23_07785	AYM17_02435	AUR58_05020	AYM93_07780	AYO29_08245	AYM38_04430	CBU_1488	glutamate--tRNA ligase	J	orthologs
1054	AYN00_07905	AYM00_04500	AYM94_07925	AYM02_04325	AYM90_07925	AYM11_04175	AYO24_07920	AYO23_07930	AYM17_02305	AUR58_04835	AYM93_07920	AYO29_08515	AYM38_04275	CBU_1517	tRNA (cytosine(34)-2'-O)-methyltransferase TrmL	J	orthologs
1084	AYN00_08115	AYM00_04245	AYM94_08135	AYM02_04095	AYM90_08135	AYM11_03950	AYO24_08135	AYO23_08140	AYM17_02085	AUR58_04575	AYM93_08130	AYO29_08740	AYM38_04050	CBU_1565	aspartate--tRNA ligase	J	orthologs
1102	AYN00_08240	AYM00_04105	AYM94_08265	AYM02_03965	AYM90_08260	AYM11_03825	AYO24_08260	AYO23_08265	AYM17_01970	AUR58_04420	AYM93_08260	AYO29_08880	AYM38_03925	CBU_1593	30S ribosomal protein S21	J	orthologs
1157	AYN00_06455	AYM00_03645	AYM94_06330	AYM02_03540	AYM90_06475	AYM11_03410	AYO24_08670	AYO23_08670	AYM17_01635	AUR58_03940	AYM93_06325	AYO29_01615	AYM38_03500	CBU_1678	spermidine acetyltransferase	J	orthologs
1167	AYN00_06555	AYM00_03540	AYM94_06430	AYM02_03435	AYM90_06575	AYM11_03305	AYO24_08770	AYO23_08770	AYM17_01545	AUR58_03835	AYM93_06425	AYO29_01525	AYM38_03395	CBU_1695	methionine--tRNA ligase	J	orthologs
1207	AYN00_08700	AYM00_03255	AYM94_08735	AYM02_03160	AYM90_08720	AYM11_03045	AYO24_09030	AYO23_09030	AYM17_00605	AUR58_03545	AYM93_08730	AYO29_01255	AYM38_03120	CBU_1748	30S ribosomal protein S9	J	orthologs
1208	AYN00_08705	AYM00_03250	AYM94_08740	AYM02_03155	AYM90_08725	AYM11_03040	AYO24_09035	AYO23_09035	AYM17_00610	AUR58_03540	AYM93_08735	AYO29_01250	AYM38_03115	CBU_1749	50S ribosomal protein L13	J	orthologs
1242	AYN00_09030	AYM00_02880	AYM94_09060	AYM02_02810	AYM90_09045	AYM11_02720	AYO24_09355	AYO23_09355	AYM17_00870	AUR58_03155	AYM93_09055	AYO29_00425	AYM38_02780	CBU_1816	elongation factor P	J	orthologs
1243	AYN00_09035	AYM00_02875	AYM94_09065	AYM02_02805	AYM90_09050	AYM11_02715	AYO24_09360	AYO23_09360	AYM17_00875	AUR58_03150	AYM93_09060	AYO29_00430	AYM38_02775	CBU_1817	poxB regulator PoxA	J	orthologs
1249	AYN00_09085	AYM00_02825	AYM94_09115	AYM02_02755	AYM90_09100	AYM11_02665	AYO24_09410	AYO23_09410	AYM17_00925	AUR58_03100	AYM93_09110	AYO29_00480	AYM38_02725	CBU_1827	multifunctional CCA tRNA nucleotidyl transferase/2'3'-cyclic phosphodiesterase/2'nucleotidase/phosphatase	J	orthologs
1262	AYN00_09155	AYM00_02750	AYM94_09185	AYM02_02680	AYM90_09170	AYM11_02595	AYO24_09480	AYO23_09480	AYM17_00995	AUR58_03020	AYM93_09180	AYO29_00550	AYM38_02655	CBU_1840	50S ribosomal protein L25/general stress protein Ctc	J	orthologs
1263	AYN00_09160	AYM00_02745	AYM94_09190	AYM02_02675	AYM90_09175	AYM11_02590	AYO24_09485	AYO23_09485	AYM17_01000	AUR58_03015	AYM93_09185	AYO29_00555	AYM38_02650	CBU_1841	peptidyl-tRNA hydrolase	J	orthologs
1264	AYN00_09165	AYM00_02740	AYM94_09195	AYM02_02670	AYM90_09180	AYM11_02585	AYO24_09490	AYO23_09490	AYM17_01005	AUR58_03010	AYM93_09190	AYO29_00560	AYM38_02645	CBU_1842	GTP-binding protein	J	orthologs
1292	AYN00_09360	AYM00_02525	AYM94_09385	AYM02_02465	AYM90_09375	AYM11_02380	AYO24_09685	AYO23_09675	AYM17_01205	AUR58_02805	AYM93_09380	AYO29_00755	AYM38_02435	CBU_1879	peptide deformylase	J	orthologs
1315	AYN00_10065	AYM00_02380	AYM94_09595	AYM02_02320	AYM90_09585	AYM11_02235	AYO24_09830	AYO23_09820	AYM17_00075	AUR58_02655	AYM93_10080	AYO29_00075	AYM38_02290	CBU_1913	glycine--tRNA ligase subunit alpha	J	orthologs
1316	AYN00_10070	AYM00_02375	AYM94_09600	AYM02_02315	AYM90_09590	AYM11_02230	AYO24_09835	AYO23_09825	AYM17_00080	AUR58_02650	AYM93_10085	AYO29_00080	AYM38_02285	CBU_1914	glycine--tRNA ligase subunit beta	J	orthologs
1319	AYN00_10090	AYM00_02355	AYM94_09620	AYM02_02295	AYM90_09610	AYM11_02210	AYO24_09855	AYO23_09845	AYM17_00100	AUR58_02630	AYM93_10105	AYO29_00100	AYM38_02265	CBU_1918	ribonuclease P protein component	J	orthologs
1353	AYN00_10300	AYM00_01235	AYM94_09830	AYM02_01215	AYM90_09820	AYM11_01175	AYO24_00550	AYO23_00555	AYM17_09705	AUR58_01500	AYM93_10315	AYO29_09805	AYM38_01190	CBU_1964	protein-(glutamine-N5) methyltransferase, release factor-specific	J	orthologs
1354	AYN00_10305	AYM00_01240	AYM94_09835	AYM02_01220	AYM90_09825	AYM11_01180	AYO24_00545	AYO23_00550	AYM17_09710	AUR58_01505	AYM93_10320	AYO29_09810	AYM38_01195	CBU_1965	peptide chain release factor 1	J	orthologs
1369	AYN00_10385	AYM00_01320	AYM94_09915	AYM02_01300	AYM90_09905	AYM11_01260	AYO24_00465	AYO23_00470	AYM17_09790	AUR58_01585	AYM93_10400	AYO29_09890	AYM38_01275	CBU_1982	rRNA methyltransferase	J	orthologs
1379	AYN00_09485	AYM00_01385	AYM94_09500	AYM02_01365	AYM90_09490	AYM11_01325	AYO24_00410	AYO23_00415	AYM17_09855	AUR58_01650	AYM93_09495	AYO29_09960	AYM38_01340	CBU_1997	methionyl-tRNA formyltransferase	J	orthologs
1385	AYN00_09515	AYM00_01420	AYM94_09530	AYM02_01405	AYM90_09520	AYM11_01355	AYO24_00380	AYO23_00385	AYM17_09885	AUR58_01690	AYM93_09525	AYO29_09990	AYM38_01375	CBU_2003	tRNA threonylcarbamoyladenosine biosynthesis protein RimN	J	orthologs
1390	AYN00_09545	AYM00_01450	AYM94_09975	AYM02_01435	AYM90_09965	AYM11_01385	AYO24_00350	AYO23_00355	AYM17_09915	AUR58_01720	AYM93_09555	AYO29_10020	AYM38_01405	CBU_2008	arginine--tRNA ligase	J	orthologs
1413	AYN00_09750	AYM00_01665	AYM94_10185	AYM02_01640	AYM90_10170	AYM11_01590	AYO24_00150	AYO23_00150	AYM17_10095	AUR58_01935	AYM93_09765	AYO29_10210	AYM38_01615	CBU_2049	tryptophan--tRNA ligase	J	orthologs
181	AYN00_01130	AYM00_00270	AYM94_01125	AYM02_00260	AYM90_01135	AYM11_00245	AYO24_01485	AYO23_01490	AYM17_08750	AUR58_00525	AYM93_01120	AYO29_02975	AYM38_00250	CBU_0225	transcription termination/antitermination protein NusG	K	orthologs
187	AYN00_01160	AYM00_00240	AYM94_01155	AYM02_00230	AYM90_01165	AYM11_00215	AYO24_01515	AYO23_01520	AYM17_08720	AUR58_00495	AYM93_01150	AYO29_03005	AYM38_00220	CBU_0231	DNA-directed RNA polymerase subunit beta	K	orthologs
188	AYN00_01165	AYM00_00235	AYM94_01160	AYM02_00225	AYM90_01170	AYM11_00210	AYO24_01520	AYO23_01525	AYM17_08715	AUR58_00490	AYM93_01155	AYO29_03010	AYM38_00215	CBU_0232	DNA-directed RNA polymerase subunit beta'	K	orthologs
219	AYN00_01315	AYM00_00075	AYM94_01310	AYM02_00070	AYM90_01325	AYM11_00055	AYO24_01670	AYO23_01675	AYM17_08560	AUR58_00325	AYM93_01305	AYO29_03345	AYM38_00060	CBU_0263	DNA-directed RNA polymerase subunit alpha	K	orthologs
249	AYN00_01515	AYM00_10945	AYM94_01510	AYM02_10575	AYM90_01525	AYM11_10235	AYO24_01870	AYO23_01875	AYM17_08365	AUR58_11475	AYM93_01505	AYO29_03545	AYM38_10415	CBU_0302	DNA-directed RNA polymerase subunit omega	K	orthologs
351	AYN00_02380	AYM00_10265	AYM94_02370	AYM02_09890	AYM90_02395	AYM11_09585	AYO24_02715	AYO23_02720	AYM17_07500	AUR58_10770	AYM93_02365	AYO29_06845	AYM38_09755	CBU_0480	arginine repressor	K	orthologs
376	AYN00_02525	AYM00_10115	AYM94_02515	AYM02_09730	AYM90_02540	AYM11_09440	AYO24_02865	AYO23_02870	AYM17_07355	AUR58_10605	AYM93_02510	AYO29_06700	AYM38_09605	CBU_0509	transcriptional regulator	K	orthologs
435	AYN00_02885	AYM00_09660	AYM94_02880	AYM02_09280	AYM90_02900	AYM11_09005	AYO24_03220	AYO23_03230	AYM17_06940	AUR58_10140	AYM93_02870	AYO29_06290	AYM38_09165	CBU_0582	BolA family transcriptional regulator	K	orthologs
561	AYN00_03880	AYM00_07355	AYM94_03880	AYM02_07055	AYM90_03895	AYM11_06835	AYO24_05520	AYO23_05535	AYM17_05980	AUR58_07790	AYM93_03870	AYO29_02025	AYM38_06955	CBU_0775	GntR family transcriptional regulator	K	orthologs
585	AYN00_04095	AYM00_07575	AYM94_04095	AYM02_07270	AYM90_04110	AYM11_07050	AYO24_05300	AYO23_05315	AYM17_05750	AUR58_08015	AYM93_04085	AYO29_02225	AYM38_07170	CBU_0818	TetR family transcriptional regulator	K	orthologs
591	AYN00_04135	AYM00_07615	AYM94_04135	AYM02_07310	AYM90_04150	AYM11_07090	AYO24_05260	AYO23_05275	AYM17_05715	AUR58_08055	AYM93_04125	AYO29_02260	AYM38_07210	CBU_0826	transcriptional regulator	K	orthologs
685	AYN00_04835	AYM00_08310	AYM94_04835	AYM02_08000	AYM90_04855	AYM11_07775	AYO24_04560	AYO23_04575	AYM17_05035	AUR58_08745	AYM93_04825	AYO29_04360	AYM38_07900	CBU_0960	XRE family transcriptional regulator	K	orthologs
748	AYN00_05325	AYM00_08840	AYM94_05330	AYM02_08520	AYM90_05345	AYM11_08285	AYO24_04075	AYO23_04090	AYM17_04515	AUR58_09280	AYM93_05320	AYO29_03870	AYM38_08415	CBU_1060	segregation and condensation protein B	K	orthologs
768	AYN00_05735	AYM00_09065	AYM94_05755	AYM02_08725	AYM90_05495	AYM11_08475	AYO24_05805	AYO23_05820	AYM17_04370	AUR58_09510	AYM93_05750	AYO29_04825	AYM38_08615	CBU_1091	ribonuclease R	K	orthologs
889	AYN00_06715	AYM00_06040	AYM94_06735	AYM02_05805	AYM90_06735	AYM11_05615	AYO24_06710	AYO23_06725	AYM17_03475	AUR58_06440	AYM93_06730	AYO29_05740	AYM38_05735	CBU_1280	transcription elongation factor GreA	K	orthologs
915	AYN00_06925	AYM00_05820	AYM94_06945	AYM02_05590	AYM90_06945	AYM11_05405	AYO24_06920	AYO23_06935	AYM17_03275	AUR58_06225	AYM93_06940	AYO29_05960	AYM38_05520	CBU_1319	transcriptional regulator	K	orthologs
946	AYN00_07130	AYM00_05595	AYM94_07150	AYM02_05365	AYM90_07150	AYM11_05185	AYO24_07125	AYO23_07140	AYM17_03070	AUR58_06000	AYM93_07145	AYO29_06165	AYM38_05300	CBU_1361	Rrf2 family transcriptional regulator	K	orthologs
980	AYN00_07390	AYM00_10660	AYM94_07410	AYM02_10300	AYM90_07410	AYM11_09975	AYO24_07390	AYO23_07400	AYM17_02825	AUR58_11180	AYM93_07405	AYO29_07375	AYM38_10150	CBU_1417	antitermination protein NusB	K	orthologs
981	AYN00_07395	AYM00_10665	AYM94_07415	AYM02_10305	AYM90_07415	AYM11_09980	AYO24_07395	AYO23_07405	AYM17_02820	AUR58_11185	AYM93_07410	AYO29_07380	AYM38_10155	CBU_1418	NrdR family transcriptional regulator	K	orthologs
992	AYN00_07470	AYM00_05015	AYM94_07490	AYM02_04785	AYM90_07490	AYM11_04615	AYO24_07475	AYO23_07485	AYM17_02730	AUR58_05365	AYM93_07485	AYO29_03840	AYM38_04725	CBU_1433	transcription termination/antitermination protein NusA	K	orthologs
1027	AYN00_07705	AYM00_04765	AYM94_07725	AYM02_04550	AYM90_07725	AYM11_04380	AYO24_07715	AYO23_07725	AYM17_02495	AUR58_05110	AYM93_07720	AYO29_08395	AYM38_04490	CBU_1476	transcriptional regulator	K	orthologs
1043	AYN00_07830	AYM00_04585	AYM94_07850	AYM02_04405	AYM90_07850	AYM11_04250	AYO24_07845	AYO23_07855	AYM17_02375	AUR58_04920	AYM93_07845	AYO29_08445	AYM38_04350	CBU_1503	ribonuclease III	K	orthologs
1105	AYN00_08255	AYM00_04090	AYM94_08280	AYM02_03950	AYM90_08275	AYM11_03810	AYO24_08275	AYO23_08280	AYM17_01955	AUR58_04405	AYM93_08275	AYO29_08895	AYM38_03910	CBU_1596	RNA polymerase subunit sigma-70	K	orthologs
1149	AYN00_06410	AYM00_03700	AYM94_06285	AYM02_03585	AYM90_06430	AYM11_03455	AYO24_08625	AYO23_08625	AYM17_01680	AUR58_03995	AYM93_06280	AYO29_01660	AYM38_03550	CBU_1669	RNA polymerase sigma factor RpoS	K	orthologs
1312	AYN00_10050	AYM00_02395	AYM94_09580	AYM02_02335	AYM90_09570	AYM11_02250	AYO24_09815	AYO23_09805	AYM17_00060	AUR58_02670	AYM93_10065	AYO29_00055	AYM38_02305	CBU_1909	RNA polymerase factor sigma-32	K	orthologs
1326	AYN00_10125	AYM00_02310	AYM94_09655	AYM02_02255	AYM90_09645	AYM11_02175	AYO24_09890	AYO23_09880	AYM17_00140	AUR58_02580	AYM93_10140	AYO29_00140	AYM38_02225	CBU_1927	chromosome partitioning protein ParB	K	orthologs
1437	AYN00_09930	AYM00_01860	AYM94_10365	AYM02_01820	AYM90_10350	AYM11_01760	AYO24_10280	AYO23_10270	AYM17_10275	AUR58_02135	AYM93_09945	AYO29_10390	AYM38_01795	CBU_2086	transcription termination factor Rho	K	orthologs
1444	AYN00_09965	AYM00_01895	AYM94_10400	AYM02_01855	AYM90_10385	AYM11_01795	AYO24_10315	AYO23_10305	AYM17_10310	AUR58_02170	AYM93_09980	AYO29_10425	AYM38_01830	CBU_2093	hypothetical protein	K	orthologs
275	AYN00_01695	AYM00_10755	AYM94_01690	AYM02_10390	AYM90_01705	AYM11_10055	AYO24_02045	AYO23_02050	AYM17_08165	AUR58_11285	AYM93_01685	AYO29_03715	AYM38_10230	CBU_0337	Fis family transcriptional regulator	KL	orthologs
560	AYN00_03875	AYM00_07350	AYM94_03875	AYM02_07050	AYM90_03890	AYM11_06830	AYO24_05525	AYO23_05540	AYM17_05985	AUR58_07785	AYM93_03865	AYO29_02020	AYM38_06950	CBU_0774	hypothetical protein	KT	orthologs
39	AYN00_09985	AYM00_01925	AYM94_10420	AYM02_01885	AYM90_10405	AYM11_01815	AYO24_10335	AYO23_10325	AYM17_10330	AUR58_02200	AYM93_10000	AYO29_10445	AYM38_01850	CBU_0001	chromosomal replication initiation protein DnaA	L	orthologs
40	AYN00_09990	AYM00_01930	AYM94_10425	AYM02_01890	AYM90_10410	AYM11_01820	AYO24_10340	AYO23_10330	AYM17_10335	AUR58_02205	AYM93_10005	AYO29_10450	AYM38_01855	CBU_0002	DNA polymerase III subunit beta	L	orthologs
41	AYN00_10000	AYM00_01940	AYM94_10435	AYM02_01900	AYM90_10420	AYM11_01830	AYO24_10350	AYO23_10340	AYM17_10345	AUR58_02215	AYM93_10015	AYO29_10460	AYM38_01865	CBU_0004	DNA gyrase subunit B	L	orthologs
81	AYN00_00300	AYM00_01110	AYM94_00300	AYM02_01095	AYM90_00305	AYM11_01065	AYO24_00595	AYO23_00600	AYM17_09595	AUR58_01380	AYM93_00295	AYO29_09235	AYM38_01075	CBU_0064	DNA topoisomerase IV subunit B	L	orthologs
223	AYN00_01350	AYM00_00040	AYM94_01345	AYM02_00035	AYM90_01360	AYM11_00020	AYO24_01705	AYO23_01710	AYM17_08530	AUR58_00290	AYM93_01340	AYO29_03375	AYM38_00025	CBU_0271	single-stranded DNA-binding protein	L	orthologs
226	AYN00_01365	AYM00_11095	AYM94_01360	AYM02_10725	AYM90_01375	AYM11_10385	AYO24_01720	AYO23_01725	AYM17_08515	AUR58_11615	AYM93_01355	AYO29_03390	AYM38_10565	CBU_0274	ABC-ATPase UvrA	L	orthologs
232	AYN00_01400	AYM00_11060	AYM94_01395	AYM02_10690	AYM90_01410	AYM11_10350	AYO24_01755	AYO23_01760	AYM17_08480	AUR58_11590	AYM93_01390	AYO29_03425	AYM38_10530	CBU_0280	DNA polymerase IV	L	orthologs
244	AYN00_01490	AYM00_10970	AYM94_01485	AYM02_10600	AYM90_01500	AYM11_10260	AYO24_01845	AYO23_01850	AYM17_08390	AUR58_11500	AYM93_01480	AYO29_03520	AYM38_10440	CBU_0297	DNA-(apurinic or apyrimidinic site) lyase	L	orthologs
260	AYN00_01585	AYM00_10875	AYM94_01580	AYM02_10505	AYM90_01595	AYM11_10165	AYO24_01940	AYO23_01945	AYM17_08295	AUR58_11405	AYM93_01575	AYO29_03615	AYM38_10345	CBU_0316	ribonuclease HI	L	orthologs
261	AYN00_01595	AYM00_10865	AYM94_01590	AYM02_10495	AYM90_01605	AYM11_10155	AYO24_01950	AYO23_01955	AYM17_08285	AUR58_11395	AYM93_01585	AYO29_03620	AYM38_10335	CBU_0317	DNA polymerase III subunit epsilon	L	orthologs
295	AYN00_01905	AYM00_05235	AYM94_01900	AYM02_05005	AYM90_01920	AYM11_04835	AYO24_02250	AYO23_02260	AYM17_07960	AUR58_05595	AYM93_01895	AYO29_03205	AYM38_04940	CBU_0383	DNA-3-methyladenine glycosylase	L	orthologs
320	AYN00_02185	AYM00_05510	AYM94_02175	AYM02_05285	AYM90_02200	AYM11_05110	AYO24_02520	AYO23_02525	AYM17_07690	AUR58_05895	AYM93_02170	AYO29_07040	AYM38_05225	CBU_0441	cysteine methyltransferase	L	orthologs
342	AYN00_02310	AYM00_10335	AYM94_02300	AYM02_09960	AYM90_02325	AYM11_09655	AYO24_02645	AYO23_02650	AYM17_07565	AUR58_10840	AYM93_02295	AYO29_06915	AYM38_09825	CBU_0468	exodeoxyribonuclease VII small subunit	L	orthologs
344	AYN00_02335	AYM00_10310	AYM94_02325	AYM02_09935	AYM90_02350	AYM11_09630	AYO24_02670	AYO23_02675	AYM17_07545	AUR58_10815	AYM93_02320	AYO29_06890	AYM38_09800	CBU_0472	ATP-dependent DNA helicase RecQ	L	orthologs
345	AYN00_02340	AYM00_10305	AYM94_02330	AYM02_09930	AYM90_02355	AYM11_09625	AYO24_02675	AYO23_02680	AYM17_07540	AUR58_10810	AYM93_02325	AYO29_06885	AYM38_09795	CBU_0473	DNA-binding protein	L	orthologs
360	AYN00_02430	AYM00_10215	AYM94_02420	AYM02_09840	AYM90_02445	AYM11_09535	AYO24_02765	AYO23_02770	AYM17_07450	AUR58_10720	AYM93_02415	AYO29_06795	AYM38_09705	CBU_0490	DNA polymerase III	L	orthologs
370	AYN00_02480	AYM00_10165	AYM94_02470	AYM02_09785	AYM90_02495	AYM11_09485	AYO24_02815	AYO23_02820	AYM17_07400	AUR58_10660	AYM93_02465	AYO29_06745	AYM38_09650	CBU_0500	DNA polymerase III subunit delta'	L	orthologs
372	AYN00_02490	AYM00_10155	AYM94_02480	AYM02_09775	AYM90_02505	AYM11_09475	AYO24_02825	AYO23_02830	AYM17_07390	AUR58_10650	AYM93_02475	AYO29_06735	AYM38_09640	CBU_0502	deoxyribonuclease	L	orthologs
375	AYN00_02510	AYM00_10130	AYM94_02500	AYM02_09745	AYM90_02525	AYM11_09455	AYO24_02850	AYO23_02855	AYM17_07370	AUR58_10620	AYM93_02495	AYO29_06715	AYM38_09620	CBU_0506	single-stranded-DNA-specific exonuclease RecJ	L	orthologs
384	AYN00_02590	AYM00_10050	AYM94_02580	AYM02_09665	AYM90_02605	AYM11_09375	AYO24_02930	AYO23_02935	AYM17_07230	AUR58_10540	AYM93_02575	AYO29_06600	AYM38_09540	CBU_0518	excinuclease ABC subunit B	L	orthologs
389	AYN00_02615	AYM00_10015	AYM94_02610	AYM02_09635	AYM90_02630	AYM11_09350	AYO24_02955	AYO23_02960	AYM17_07205	AUR58_10505	AYM93_02600	AYO29_06570	AYM38_09515	CBU_0524	DNA gyrase subunit A	L	orthologs
404	AYN00_02700	AYM00_09930	AYM94_02695	AYM02_09550	AYM90_02715	AYM11_09265	AYO24_03040	AYO23_03045	AYM17_07120	AUR58_10420	AYM93_02685	AYO29_06485	AYM38_09430	CBU_0542	DNA ligase (NAD(+)) LigA	L	orthologs
415	AYN00_02770	AYM00_09865	AYM94_02765	AYM02_09480	AYM90_02785	AYM11_09200	AYO24_03105	AYO23_03115	AYM17_07055	AUR58_10345	AYM93_02755	AYO29_06410	AYM38_09360	CBU_0557	DNA polymerase III subunit delta	L	orthologs
486	AYN00_03250	AYM00_06760	AYM94_03245	AYM02_06470	AYM90_03265	AYM11_06260	AYO24_03585	AYO23_03595	AYM17_06600	AUR58_07170	AYM93_03235	AYO29_07805	AYM38_06405	CBU_0657	recombination protein RecR	L	orthologs
488	AYN00_03260	AYM00_06770	AYM94_03255	AYM02_06480	AYM90_03275	AYM11_06270	AYO24_03595	AYO23_03605	AYM17_06590	AUR58_07180	AYM93_03245	AYO29_07795	AYM38_06415	CBU_0659	hypothetical protein	L	orthologs
627	AYN00_04345	AYM00_07825	AYM94_04345	AYM02_07520	AYM90_04360	AYM11_07300	AYO24_05050	AYO23_05065	AYM17_05505	AUR58_08265	AYM93_04335	AYO29_02470	AYM38_07420	CBU_0868	replicative DNA helicase	L	orthologs
669	AYN00_04660	AYM00_08130	AYM94_04660	AYM02_07820	AYM90_04680	AYM11_07595	AYO24_04735	AYO23_04750	AYM17_05200	AUR58_08570	AYM93_04650	AYO29_04520	AYM38_07720	CBU_0930	3-methyladenine DNA glycosylase	L	orthologs
676	AYN00_04715	AYM00_08185	AYM94_04715	AYM02_07875	AYM90_04735	AYM11_07650	AYO24_04680	AYO23_04695	AYM17_05145	AUR58_08625	AYM93_04705	AYO29_04465	AYM38_07775	CBU_0940	A/G-specific adenine glycosylase	L	orthologs
710	AYN00_04975	AYM00_08455	AYM94_04975	AYM02_08145	AYM90_04995	AYM11_07915	AYO24_04420	AYO23_04435	AYM17_04890	AUR58_08895	AYM93_04965	AYO29_04215	AYM38_08045	CBU_0988	uracil-DNA glycosylase	L	orthologs
743	AYN00_05295	AYM00_08810	AYM94_05300	AYM02_08490	AYM90_05315	AYM11_08255	AYO24_04105	AYO23_04120	AYM17_04545	AUR58_09250	AYM93_05290	AYO29_03900	AYM38_08385	CBU_1054	DNA recombination/repair protein RecA	L	orthologs
745	AYN00_05305	AYM00_08820	AYM94_05310	AYM02_08500	AYM90_05325	AYM11_08265	AYO24_04095	AYO23_04110	AYM17_04535	AUR58_09260	AYM93_05300	AYO29_03890	AYM38_08395	CBU_1056	DNA mismatch repair protein MutS	L	orthologs
763	AYN00_05445	AYM00_07135	AYM94_05470	AYM02_06840	AYM90_05465	AYM11_06625	AYO24_03960	AYO23_03975	AYM17_04405	AUR58_07555	AYM93_05465	AYO29_04805	AYM38_06745	CBU_1083	DNA mismatch repair protein MutL	L	orthologs
819	AYN00_06195	AYM00_09520	AYM94_06215	AYM02_09155	AYM90_06215	AYM11_08890	AYO24_06270	AYO23_06285	AYM17_03940	AUR58_09975	AYM93_06210	AYO29_05295	AYM38_09045	CBU_1185	excinuclease ABC subunit C	L	orthologs
822	AYN00_06220	AYM00_06540	AYM94_06550	AYM02_06260	AYM90_06240	AYM11_06060	AYO24_06295	AYO23_06310	AYM17_03920	AUR58_06950	AYM93_06545	AYO29_05320	AYM38_06190	CBU_1189	recombination factor protein RarA	L	orthologs
849	AYN00_05540	AYM00_06325	AYM94_05560	AYM02_06065	AYM90_05635	AYM11_05860	AYO24_06470	AYO23_06480	AYM17_03725	AUR58_06730	AYM93_05555	AYO29_05495	AYM38_05990	CBU_1230	ATP-dependent helicase	L	orthologs
859	AYN00_05600	AYM00_06255	AYM94_05620	AYM02_06000	AYM90_05695	AYM11_05800	AYO24_06530	AYO23_06540	AYM17_03665	AUR58_06660	AYM93_05615	AYO29_05560	AYM38_05930	CBU_1243	exodeoxyribonuclease VII large subunit	L	orthologs
902	AYN00_06800	AYM00_05955	AYM94_06820	AYM02_05720	AYM90_06820	AYM11_05530	AYO24_06795	AYO23_06810	AYM17_03390	AUR58_06355	AYM93_06815	AYO29_05825	AYM38_05650	CBU_1297	DNA repair protein RecN	L	orthologs
916	AYN00_06930	AYM00_05815	AYM94_06950	AYM02_05585	AYM90_06950	AYM11_05400	AYO24_06925	AYO23_06940	AYM17_03270	AUR58_06220	AYM93_06945	AYO29_05965	AYM38_05515	CBU_1320	integration host factor subunit alpha	L	orthologs
924	AYN00_06975	AYM00_05770	AYM94_06995	AYM02_05540	AYM90_06995	AYM11_05355	AYO24_06970	AYO23_06985	AYM17_03225	AUR58_06175	AYM93_06990	AYO29_06010	AYM38_05470	CBU_1329	radical SAM protein	L	orthologs
928	AYN00_07015	AYM00_05725	AYM94_07035	AYM02_05495	AYM90_07035	AYM11_05315	AYO24_07010	AYO23_07025	AYM17_03185	AUR58_06125	AYM93_07030	AYO29_06050	AYM38_05430	CBU_1337	DNA polymerase III subunit alpha	L	orthologs
930	AYN00_07025	AYM00_05715	AYM94_07045	AYM02_05485	AYM90_07045	AYM11_05305	AYO24_07020	AYO23_07035	AYM17_03175	AUR58_06115	AYM93_07040	AYO29_06060	AYM38_05420	CBU_1339	ribonuclease HII	L	orthologs
948	AYN00_07140	AYM00_05580	AYM94_07160	AYM02_05350	AYM90_07160	AYM11_05175	AYO24_07135	AYO23_07150	AYM17_03060	AUR58_05980	AYM93_07155	AYO29_06175	AYM38_05285	CBU_1363	exodeoxyribonuclease I	L	orthologs
1015	AYN00_07645	AYM00_04830	AYM94_07665	AYM02_04610	AYM90_07665	AYM11_04440	AYO24_07655	AYO23_07665	AYM17_02555	AUR58_05180	AYM93_07660	AYO29_08335	AYM38_04555	CBU_1464	DNA-binding protein HU	L	orthologs
1041	AYN00_07820	AYM00_04595	AYM94_07840	AYM02_04415	AYM90_07840	AYM11_04260	AYO24_07835	AYO23_07845	AYM17_02385	AUR58_04930	AYM93_07835	AYO29_08435	AYM38_04360	CBU_1501	DNA repair protein RecO	L	orthologs
1077	AYN00_03290	AYM00_04290	AYM94_03285	AYM02_04140	AYM90_03305	AYM11_03995	AYO24_03625	AYO23_03635	AYM17_02130	AUR58_07210	AYM93_03275	AYO29_07765	AYM38_04095	CBU_1555	transposase	L	orthologs
1086	AYN00_08125	AYM00_04235	AYM94_08145	AYM02_04085	AYM90_08145	AYM11_03940	AYO24_08145	AYO23_08150	AYM17_02075	AUR58_04565	AYM93_08140	AYO29_08750	AYM38_04040	CBU_1567	crossover junction endodeoxyribonuclease RuvC	L	orthologs
1087	AYN00_08130	AYM00_04230	AYM94_08150	AYM02_04080	AYM90_08150	AYM11_03935	AYO24_08150	AYO23_08155	AYM17_02070	AUR58_04560	AYM93_08145	AYO29_08755	AYM38_04035	CBU_1568	Holliday junction ATP-dependent DNA helicase RuvA	L	orthologs
1088	AYN00_08140	AYM00_04220	AYM94_08160	AYM02_04070	AYM90_08160	AYM11_03925	AYO24_08160	AYO23_08165	AYM17_02060	AUR58_04550	AYM93_08155	AYO29_08765	AYM38_04025	CBU_1570	ATP-dependent DNA helicase RuvB	L	orthologs
1104	AYN00_08250	AYM00_04095	AYM94_08275	AYM02_03955	AYM90_08270	AYM11_03815	AYO24_08270	AYO23_08275	AYM17_01960	AUR58_04410	AYM93_08270	AYO29_08890	AYM38_03915	CBU_1595	DNA primase	L	orthologs
1169	AYN00_06565	AYM00_03530	AYM94_06440	AYM02_03425	AYM90_06585	AYM11_03295	AYO24_08780	AYO23_08780	AYM17_01535	AUR58_03825	AYM93_06435	AYO29_01515	AYM38_03385	CBU_1697	endonuclease III	L	orthologs
1199	AYN00_08650	AYM00_03300	AYM94_08685	AYM02_03205	AYM90_08670	AYM11_03090	AYO24_08980	AYO23_08980	AYM17_00555	AUR58_03590	AYM93_08680	AYO29_01300	AYM38_03165	CBU_1738	integration host factor subunit beta	L	orthologs
1231	AYN00_08920	AYM00_03005	AYM94_08950	AYM02_02930	AYM90_08935	AYM11_02835	AYO24_09245	AYO23_09245	AYM17_00800	AUR58_03285	AYM93_08945	AYO29_01060	AYM38_02895	CBU_1795	DNA polymerase I	L	orthologs
1241	AYN00_09025	AYM00_02885	AYM94_09055	AYM02_02815	AYM90_09040	AYM11_02725	AYO24_09350	AYO23_09350	AYM17_00865	AUR58_03160	AYM93_09050	AYO29_00420	AYM38_02785	CBU_1815	hypothetical protein	L	orthologs
1280	AYN00_09295	AYM00_02595	AYM94_09325	AYM02_02535	AYM90_09310	AYM11_02450	AYO24_09615	AYO23_09615	AYM17_01135	AUR58_02870	AYM93_09320	AYO29_00690	AYM38_02505	CBU_1866	DNA topoisomerase IV subunit A	L	orthologs
1304	AYN00_10005	AYM00_02440	AYM94_09535	AYM02_02380	AYM90_09525	AYM11_02295	AYO24_09770	AYO23_09760	AYM17_00015	AUR58_02715	AYM93_10020	AYO29_00010	AYM38_02350	CBU_1899	16S rRNA (guanine(966)-N(2))-methyltransferase RsmD	L	orthologs
1334	AYN00_10165	AYM00_02270	AYM94_09695	AYM02_02215	AYM90_09685	AYM11_02135	AYO24_09930	AYO23_09920	AYM17_00180	AUR58_02540	AYM93_10180	AYO29_00180	AYM38_02185	CBU_1934	DNA ligase	L	orthologs
1382	AYN00_09500	AYM00_01405	AYM94_09515	AYM02_01390	AYM90_09505	AYM11_01340	AYO24_00395	AYO23_00400	AYM17_09870	AUR58_01675	AYM93_09510	AYO29_09975	AYM38_01360	CBU_2000	DNA topoisomerase I	L	orthologs
1415	AYN00_09775	AYM00_01690	AYM94_10210	AYM02_01665	AYM90_10195	AYM11_01615	AYO24_00125	AYO23_00125	AYM17_10120	AUR58_01960	AYM93_09790	AYO29_10235	AYM38_01640	CBU_2054	DNA helicase II	L	orthologs
1445	AYN00_09970	AYM00_01900	AYM94_10405	AYM02_01860	AYM90_10390	AYM11_01800	AYO24_10320	AYO23_10310	AYM17_10315	AUR58_02175	AYM93_09985	AYO29_10430	AYM38_01835	CBU_2094	crossover junction endodeoxyribonuclease RuvA	L	orthologs
252	AYN00_01530	AYM00_10930	AYM94_01525	AYM02_10560	AYM90_01540	AYM11_10220	AYO24_01885	AYO23_01890	AYM17_08350	AUR58_11460	AYM93_01520	AYO29_03560	AYM38_10400	CBU_0305	ATP-dependent DNA helicase RecG	LK	orthologs
802	AYN00_06015	AYM00_09345	AYM94_06035	AYM02_08980	AYM90_06035	AYM11_08715	AYO24_06095	AYO23_06110	AYM17_04110	AUR58_09800	AYM93_06030	AYO29_05115	AYM38_08870	CBU_1148	transcription-repair coupling factor	LK	orthologs
494	AYN00_03325	AYM00_06830	AYM94_03320	AYM02_06540	AYM90_03340	AYM11_06325	AYO24_03660	AYO23_03670	AYM17_06530	AUR58_07245	AYM93_03310	AYO29_07730	AYM38_06475	CBU_0670	ATP-dependent RNA helicase RhlE	LKJ	orthologs
1072	AYN00_08050	AYM00_04325	AYM94_08070	AYM02_04165	AYM90_08070	AYM11_04020	AYO24_08070	AYO23_08075	AYM17_02155	AUR58_04660	AYM93_08065	AYO29_08660	AYM38_04120	CBU_1551	RNA pyrophosphohydrolase	LR	orthologs
1380	AYN00_09490	AYM00_01395	AYM94_09505	AYM02_01380	AYM90_09495	AYM11_01330	AYO24_00405	AYO23_00410	AYM17_09860	AUR58_01665	AYM93_09500	AYO29_09965	AYM38_01350	CBU_1998	DNA processing protein DprA	LU	orthologs
71	AYN00_00220	AYM00_01190	AYM94_00220	AYM02_01175	AYM90_00225	AYM11_01145	AYO24_00675	AYO23_00680	AYM17_09675	AUR58_01460	AYM93_00215	AYO29_09160	AYM38_01155	CBU_0045	hypothetical protein	M	orthologs
80	AYN00_00295	AYM00_01115	AYM94_00295	AYM02_01100	AYM90_00300	AYM11_01070	AYO24_00600	AYO23_00605	AYM17_09600	AUR58_01385	AYM93_00290	AYO29_09230	AYM38_01080	CBU_0063	3-deoxy-D-manno-octulosonic acid transferase	M	orthologs
99	AYN00_00435	AYM00_00985	AYM94_00430	AYM02_00965	AYM90_00440	AYM11_00945	AYO24_00790	AYO23_00795	AYM17_09475	AUR58_01255	AYM93_00425	AYO29_09710	AYM38_00950	CBU_0091	peptidoglycan-binding protein	M	orthologs
122	AYN00_00585	AYM00_00830	AYM94_00580	AYM02_00810	AYM90_00590	AYM11_00795	AYO24_00940	AYO23_00945	AYM17_09325	AUR58_01100	AYM93_00575	AYO29_09560	AYM38_00795	CBU_0116	ribosomal RNA small subunit methyltransferase H	M	orthologs
124	AYN00_00595	AYM00_00820	AYM94_00590	AYM02_00800	AYM90_00600	AYM11_00785	AYO24_00950	AYO23_00955	AYM17_09315	AUR58_01090	AYM93_00585	AYO29_09550	AYM38_00785	CBU_0118	cell division protein	M	orthologs
127	AYN00_00615	AYM00_00800	AYM94_00610	AYM02_00780	AYM90_00620	AYM11_00765	AYO24_00970	AYO23_00975	AYM17_09295	AUR58_01070	AYM93_00605	AYO29_09530	AYM38_00765	CBU_0123	UDP-N-acetylmuramoyl-L-alanyl-D-glutamate--2, 6-diaminopimelate ligase	M	orthologs
128	AYN00_00620	AYM00_00795	AYM94_00615	AYM02_00775	AYM90_00625	AYM11_00760	AYO24_00975	AYO23_00980	AYM17_09290	AUR58_01065	AYM93_00610	AYO29_09525	AYM38_00760	CBU_0124	UDP-N-acetylmuramoyl-tripeptide--D-alanyl-D- alanine ligase	M	orthologs
129	AYN00_00625	AYM00_00790	AYM94_00620	AYM02_00770	AYM90_00630	AYM11_00755	AYO24_00980	AYO23_00985	AYM17_09285	AUR58_01060	AYM93_00615	AYO29_09520	AYM38_00755	CBU_0125	phospho-N-acetylmuramoyl-pentapeptide- transferase	M	orthologs
131	AYN00_00645	AYM00_00770	AYM94_00640	AYM02_00750	AYM90_00650	AYM11_00735	AYO24_01000	AYO23_01005	AYM17_09270	AUR58_01040	AYM93_00635	AYO29_09505	AYM38_00735	CBU_0131	UDP-N-acetylmuramoylalanine--D-glutamate ligase	M	orthologs
133	AYN00_00665	AYM00_00750	AYM94_00660	AYM02_00730	AYM90_00670	AYM11_00715	AYO24_01020	AYO23_01025	AYM17_09250	AUR58_01020	AYM93_00655	AYO29_09485	AYM38_00715	CBU_0135	UDP-N-acetylglucosamine--N-acetylmuramyl- (pentapeptide) pyrophosphoryl-undecaprenol N-acetylglucosamine transferase	M	orthologs
134	AYN00_00670	AYM00_00745	AYM94_00665	AYM02_00725	AYM90_00675	AYM11_00710	AYO24_01025	AYO23_01030	AYM17_09245	AUR58_01015	AYM93_00660	AYO29_09480	AYM38_00710	CBU_0136	UDP-N-acetylmuramate--alanine ligase	M	orthologs
135	AYN00_00675	AYM00_00740	AYM94_00670	AYM02_00720	AYM90_00680	AYM11_00705	AYO24_01030	AYO23_01035	AYM17_09240	AUR58_01010	AYM93_00665	AYO29_09475	AYM38_00705	CBU_0137	UDP-N-acetylenolpyruvoylglucosamine reductase	M	orthologs
136	AYN00_00680	AYM00_00735	AYM94_00675	AYM02_00715	AYM90_00685	AYM11_00700	AYO24_01035	AYO23_01040	AYM17_09235	AUR58_01005	AYM93_00670	AYO29_09470	AYM38_00700	CBU_0138	cell division protein FtsQ	M	orthologs
140	AYN00_00700	AYM00_00715	AYM94_00695	AYM02_00695	AYM90_00705	AYM11_00680	AYO24_01055	AYO23_01060	AYM17_09215	AUR58_00985	AYM93_00690	AYO29_09450	AYM38_00680	CBU_0142	UDP-3-O-[3-hydroxymyristoyl] N-acetylglucosamine deacetylase	M	orthologs
159	AYN00_00875	AYM00_00540	AYM94_00870	AYM02_00520	AYM90_00880	AYM11_00505	AYO24_01230	AYO23_01235	AYM17_09005	AUR58_00810	AYM93_00865	AYO29_02720	AYM38_00505	CBU_0177	quaternary ammonium transporter	M	orthologs
162	AYN00_00890	AYM00_00525	AYM94_00885	AYM02_00505	AYM90_00895	AYM11_00490	AYO24_01245	AYO23_01250	AYM17_08990	AUR58_00795	AYM93_00880	AYO29_02735	AYM38_00490	CBU_0180	peptidase M23	M	orthologs
169	AYN00_00990	AYM00_00420	AYM94_00985	AYM02_00400	AYM90_00995	AYM11_00380	AYO24_01345	AYO23_01350	AYM17_08890	AUR58_00690	AYM93_00980	AYO29_02835	AYM38_00385	CBU_0198	hypothetical protein	M	orthologs
245	AYN00_01495	AYM00_10965	AYM94_01490	AYM02_10595	AYM90_01505	AYM11_10255	AYO24_01850	AYO23_01855	AYM17_08385	AUR58_11495	AYM93_01485	AYO29_03525	AYM38_10435	CBU_0298	glutamate racemase	M	orthologs
350	AYN00_02375	AYM00_10270	AYM94_02365	AYM02_09895	AYM90_02390	AYM11_09590	AYO24_02710	AYO23_02715	AYM17_07505	AUR58_10775	AYM93_02360	AYO29_06850	AYM38_09760	CBU_0479	3-deoxy-manno-octulosonate cytidylyltransferase	M	orthologs
359	AYN00_02425	AYM00_10220	AYM94_02415	AYM02_09845	AYM90_02440	AYM11_09540	AYO24_02760	AYO23_02765	AYM17_07455	AUR58_10725	AYM93_02410	AYO29_06800	AYM38_09710	CBU_0489	phospholipase	M	orthologs
397	AYN00_02660	AYM00_09970	AYM94_02655	AYM02_09590	AYM90_02675	AYM11_09305	AYO24_03000	AYO23_03005	AYM17_07160	AUR58_10460	AYM93_02645	AYO29_06525	AYM38_09470	CBU_0533	UDP-phosphate alpha-N-acetylglucosaminyltransferase	M	orthologs
409	AYN00_02730	AYM00_09900	AYM94_02725	AYM02_09520	AYM90_02745	AYM11_09235	AYO24_03070	AYO23_03075	AYM17_07090	AUR58_10390	AYM93_02715	AYO29_06445	AYM38_09400	CBU_0548	murein transglycosylase	M	orthologs
411	AYN00_02740	AYM00_09890	AYM94_02735	AYM02_09510	AYM90_02755	AYM11_09225	AYO24_03080	AYO23_03085	AYM17_07080	AUR58_10380	AYM93_02725	AYO29_06435	AYM38_09390	CBU_0550	penicillin-binding protein 2	M	orthologs
416	AYN00_02775	AYM00_09860	AYM94_02770	AYM02_09475	AYM90_02790	AYM11_09195	AYO24_03110	AYO23_03120	AYM17_07050	AUR58_10340	AYM93_02760	AYO29_06405	AYM38_09355	CBU_0558	hypothetical protein	M	orthologs
419	AYN00_02800	AYM00_09830	AYM94_02795	AYM02_09445	AYM90_02815	AYM11_09165	AYO24_03135	AYO23_03145	AYM17_07025	AUR58_10310	AYM93_02785	AYO29_06375	AYM38_09325	CBU_0564	acyltransferase	M	orthologs
431	AYN00_02865	AYM00_09765	AYM94_02860	AYM02_09380	AYM90_02880	AYM11_09100	AYO24_03200	AYO23_03210	AYM17_06960	AUR58_10245	AYM93_02850	AYO29_06310	AYM38_09260	CBU_0578	glycosyl transferase family 2	M	orthologs
432	AYN00_02870	AYM00_09760	AYM94_02865	AYM02_09375	AYM90_02885	AYM11_09095	AYO24_03205	AYO23_03215	AYM17_06955	AUR58_10240	AYM93_02855	AYO29_06305	AYM38_09255	CBU_0579	UDP-phosphomannose--protein mannosyltransferase	M	orthologs
450	AYN00_03025	AYM00_09580	AYM94_03020	AYM02_09210	AYM90_03040	AYM11_08940	AYO24_03355	AYO23_03365	AYM17_06820	AUR58_10050	AYM93_03010	AYO29_07140	AYM38_09095	CBU_0611	outer membrane protein assembly factor BamA	M	orthologs
451	AYN00_03030	AYM00_09575	AYM94_03025	AYM02_09205	AYM90_03045	AYM11_08935	AYO24_03360	AYO23_03370	AYM17_06815	AUR58_10045	AYM93_03015	AYO29_07135	AYM38_09090	CBU_0612	hypothetical protein	M	orthologs
452	AYN00_03035	AYM00_09570	AYM94_03030	AYM02_09200	AYM90_03050	AYM11_08930	AYO24_03365	AYO23_03375	AYM17_06810	AUR58_10040	AYM93_03020	AYO29_07130	AYM38_09085	CBU_0613	UDP-3-O-(3-hydroxymyristoyl)glucosamine N-acyltransferase	M	orthologs
454	AYN00_03045	AYM00_09560	AYM94_03040	AYM02_09190	AYM90_03060	AYM11_08920	AYO24_03375	AYO23_03385	AYM17_06800	AUR58_10030	AYM93_03030	AYO29_07120	AYM38_09075	CBU_0615	acyl-[acyl-carrier-protein]--UDP-N- acetylglucosamine O-acyltransferase	M	orthologs
458	AYN00_03070	AYM00_06570	AYM94_03065	AYM02_06285	AYM90_03085	AYM11_06080	AYO24_03405	AYO23_03415	AYM17_06775	AUR58_06980	AYM93_03055	AYO29_07970	AYM38_06220	CBU_0620	lipid-A-disaccharide synthase	M	orthologs
495	AYN00_03340	AYM00_06845	AYM94_03335	AYM02_06555	AYM90_03355	AYM11_06340	AYO24_03675	AYO23_03685	AYM17_06515	AUR58_07260	AYM93_03325	AYO29_07715	AYM38_06490	CBU_0671	mannose-1-phosphate guanylyltransferase/mannose-6-phosphate isomerase	M	orthologs
501	AYN00_03430	AYM00_06940	AYM94_03430	AYM02_06645	AYM90_03445	AYM11_06430	AYO24_03765	AYO23_03775	AYM17_06425	AUR58_07350	AYM93_03420	AYO29_07625	AYM38_06550	CBU_0689	GDP-mannose 4,6 dehydratase	M	orthologs
502	AYN00_03435	AYM00_06945	AYM94_03435	AYM02_06650	AYM90_03450	AYM11_06435	AYO24_03770	AYO23_03780	AYM17_06420	AUR58_07355	AYM93_03425	AYO29_07620	AYM38_06555	CBU_0690	polyprenyl-phosphate beta-D-mannosyltransferase	M	orthologs
506	AYN00_03465	AYM00_06975	AYM94_03465	AYM02_06680	AYM90_03480	AYM11_06465	AYO24_03800	AYO23_03810	AYM17_06390	AUR58_07385	AYM93_03455	AYO29_07590	AYM38_06585	CBU_0696	aminotransferase DegT	M	orthologs
507	AYN00_03470	AYM00_06980	AYM94_03470	AYM02_06685	AYM90_03485	AYM11_06470	AYO24_03805	AYO23_03815	AYM17_06385	AUR58_07390	AYM93_03460	AYO29_07585	AYM38_06590	CBU_0697	aminotransferase DegT	M	orthologs
543	AYN00_03740	AYM00_08910	AYM94_03740	AYM02_08575	AYM90_03755	AYM11_08335	AYO24_05660	AYO23_05675	AYM17_06120	AUR58_09350	AYM93_03730	AYO29_01845	AYM38_08470	CBU_0750	D-arabinose 5-phosphate isomerase	M	orthologs
544	AYN00_03745	AYM00_08905	AYM94_03745	AYM02_08570	AYM90_03760	AYM11_08330	AYO24_05655	AYO23_05670	AYM17_06115	AUR58_09345	AYM93_03735	AYO29_01850	AYM38_08465	CBU_0751	UDP-N-acetylglucosamine 1-carboxyvinyltransferase	M	orthologs
546	AYN00_03760	AYM00_08880	AYM94_03760	AYM02_08550	AYM90_03775	AYM11_08315	AYO24_05640	AYO23_05655	AYM17_06100	AUR58_09320	AYM93_03750	AYO29_01870	AYM38_08450	CBU_0754	efflux transporter periplasmic adaptor subunit	M	orthologs
578	AYN00_04020	AYM00_07495	AYM94_04020	AYM02_07195	AYM90_04035	AYM11_06975	AYO24_05380	AYO23_05395	AYM17_05825	AUR58_07930	AYM93_04010	AYO29_02160	AYM38_07095	CBU_0803	efflux transporter periplasmic adaptor subunit	M	orthologs
590	AYN00_04130	AYM00_07610	AYM94_04130	AYM02_07305	AYM90_04145	AYM11_07085	AYO24_05265	AYO23_05280	AYM17_05720	AUR58_08050	AYM93_04120	AYO29_02255	AYM38_07205	CBU_0825	aminotransferase DegT	M	orthologs
595	AYN00_04155	AYM00_07635	AYM94_04155	AYM02_07330	AYM90_04170	AYM11_07110	AYO24_05240	AYO23_05255	AYM17_05695	AUR58_08075	AYM93_04145	AYO29_02280	AYM38_07230	CBU_0830	perosamine synthetase	M	orthologs
603	AYN00_04195	AYM00_07675	AYM94_04195	AYM02_07370	AYM90_04210	AYM11_07150	AYO24_05200	AYO23_05215	AYM17_05655	AUR58_08115	AYM93_04185	AYO29_02320	AYM38_07270	CBU_0838	lipopolysaccharide N-acetylglucosaminyltransferase	M	orthologs
604	AYN00_04200	AYM00_07680	AYM94_04200	AYM02_07375	AYM90_04215	AYM11_07155	AYO24_05195	AYO23_05210	AYM17_05650	AUR58_08120	AYM93_04190	AYO29_02325	AYM38_07275	CBU_0839	glycosyl transferase	M	orthologs
606	AYN00_04210	AYM00_07690	AYM94_04210	AYM02_07385	AYM90_04225	AYM11_07165	AYO24_05185	AYO23_05200	AYM17_05640	AUR58_08130	AYM93_04200	AYO29_02335	AYM38_07285	CBU_0841	glycosyl transferase family 1	M	orthologs
607	AYN00_04215	AYM00_07695	AYM94_04215	AYM02_07390	AYM90_04230	AYM11_07170	AYO24_05180	AYO23_05195	AYM17_05635	AUR58_08135	AYM93_04205	AYO29_02340	AYM38_07290	CBU_0842	UDP-N-acetyl glucosamine 2-epimerase	M	orthologs
608	AYN00_04220	AYM00_07700	AYM94_04220	AYM02_07395	AYM90_04235	AYM11_07175	AYO24_05175	AYO23_05190	AYM17_05630	AUR58_08140	AYM93_04210	AYO29_02345	AYM38_07295	CBU_0843	glycosyl transferase	M	orthologs
610	AYN00_04235	AYM00_07715	AYM94_04235	AYM02_07410	AYM90_04250	AYM11_07190	AYO24_05160	AYO23_05175	AYM17_05615	AUR58_08155	AYM93_04225	AYO29_02360	AYM38_07310	CBU_0846	UDP-glucose 6-dehydrogenase	M	orthologs
613	AYN00_04250	AYM00_07730	AYM94_04250	AYM02_07425	AYM90_04265	AYM11_07205	AYO24_05145	AYO23_05160	AYM17_05600	AUR58_08170	AYM93_04240	AYO29_02375	AYM38_07325	CBU_0849	UTP--glucose-1-phosphate uridylyltransferase	M	orthologs
619	AYN00_04295	AYM00_07775	AYM94_04295	AYM02_07470	AYM90_04310	AYM11_07250	AYO24_05100	AYO23_05115	AYM17_05555	AUR58_08215	AYM93_04285	AYO29_02420	AYM38_07370	CBU_0857	tetraacyldisaccharide 4'-kinase	M	orthologs
628	AYN00_04350	AYM00_07830	AYM94_04350	AYM02_07525	AYM90_04365	AYM11_07305	AYO24_05045	AYO23_05060	AYM17_05500	AUR58_08270	AYM93_04340	AYO29_02475	AYM38_07425	CBU_0869	alanine racemase	M	orthologs
666	AYN00_04635	AYM00_08105	AYM94_04635	AYM02_07795	AYM90_04655	AYM11_07570	AYO24_04760	AYO23_04775	AYM17_05225	AUR58_08545	AYM93_04625	AYO29_04545	AYM38_07695	CBU_0925	lytic transglycosylase	M	orthologs
675	AYN00_04710	AYM00_08180	AYM94_04710	AYM02_07870	AYM90_04730	AYM11_07645	AYO24_04685	AYO23_04700	AYM17_05150	AUR58_08620	AYM93_04700	AYO29_04470	AYM38_07770	CBU_0939	cell envelope biogenesis protein AsmA	M	orthologs
709	AYN00_04970	AYM00_08450	AYM94_04970	AYM02_08140	AYM90_04990	AYM11_07910	AYO24_04425	AYO23_04440	AYM17_04895	AUR58_08890	AYM93_04960	AYO29_04220	AYM38_08040	CBU_0987	hypothetical protein	M	orthologs
718	AYN00_05035	AYM00_08525	AYM94_05035	AYM02_08210	AYM90_05055	AYM11_07975	AYO24_04360	AYO23_04375	AYM17_04830	AUR58_08965	AYM93_05025	AYO29_04155	AYM38_08110	CBU_1001	ABC transporter	M	orthologs
746	AYN00_05310	AYM00_08825	AYM94_05315	AYM02_08505	AYM90_05330	AYM11_08270	AYO24_04090	AYO23_04105	AYM17_04530	AUR58_09265	AYM93_05305	AYO29_03885	AYM38_08400	CBU_1057	glycosyl transferase	M	orthologs
764	AYN00_05455	AYM00_07125	AYM94_05480	AYM02_06830	AYM90_05475	AYM11_06615	AYO24_03950	AYO23_03965	AYM17_04395	AUR58_07545	AYM93_05475	AYO29_04815	AYM38_06735	CBU_1085	N-acetylmuramoyl-L-alanine amidase	M	orthologs
823	AYN00_06225	AYM00_06535	AYM94_06555	AYM02_06255	AYM90_06245	AYM11_06055	AYO24_06300	AYO23_06315	AYM17_03915	AUR58_06945	AYM93_06550	AYO29_05325	AYM38_06185	CBU_1190	outer membrane lipoprotein carrier protein LolA	M	orthologs
872	AYN00_05685	AYM00_06155	AYM94_05705	AYM02_05905	AYM90_05780	AYM11_05710	AYO24_06615	AYO23_06630	AYM17_03575	AUR58_06555	AYM93_05700	AYO29_05645	AYM38_05835	CBU_1261	D-alanyl-D-alanine carboxypeptidase	M	orthologs
929	AYN00_07020	AYM00_05720	AYM94_07040	AYM02_05490	AYM90_07040	AYM11_05310	AYO24_07015	AYO23_07030	AYM17_03180	AUR58_06120	AYM93_07035	AYO29_06055	AYM38_05425	CBU_1338	D-alanine--D-alanine ligase	M	orthologs
986	AYN00_07425	AYM00_10695	AYM94_07445	AYM02_10335	AYM90_07445	AYM11_10010	AYO24_07425	AYO23_07435	AYM17_02790	AUR58_11215	AYM93_07440	AYO29_07415	AYM38_10185	CBU_1425	hypothetical protein	M	orthologs
1020	AYN00_07670	AYM00_04805	AYM94_07690	AYM02_04585	AYM90_07690	AYM11_04415	AYO24_07680	AYO23_07690	AYM17_02530	AUR58_05155	AYM93_07685	AYO29_08360	AYM38_04530	CBU_1469	rod shape-determining protein MreD	M	orthologs
1021	AYN00_07675	AYM00_04800	AYM94_07695	AYM02_04580	AYM90_07695	AYM11_04410	AYO24_07685	AYO23_07695	AYM17_02525	AUR58_05150	AYM93_07690	AYO29_08365	AYM38_04525	CBU_1470	rod shape-determining protein MreC	M	orthologs
1045	AYN00_07840	AYM00_04575	AYM94_07860	AYM02_04395	AYM90_07860	AYM11_04240	AYO24_07855	AYO23_07865	AYM17_02365	AUR58_04910	AYM93_07855	AYO29_08455	AYM38_04340	CBU_1505	elongation factor 4	M	orthologs
1063	AYN00_08000	AYM00_04395	AYM94_08020	AYM02_04230	AYM90_08015	AYM11_04085	AYO24_08020	AYO23_08025	AYM17_02220	AUR58_04735	AYM93_08015	AYO29_08605	AYM38_04180	CBU_1538	peptidase S41	M	orthologs
1070	AYN00_08040	AYM00_04335	AYM94_08060	AYM02_04175	AYM90_08060	AYM11_04030	AYO24_08060	AYO23_08065	AYM17_02165	AUR58_04670	AYM93_08055	AYO29_08650	AYM38_04130	CBU_1549	prolipoprotein diacylglyceryl transferase	M	orthologs
1107	AYN00_08290	AYM00_04045	AYM94_08315	AYM02_03910	AYM90_08310	AYM11_03775	AYO24_08310	AYO23_08315	AYM17_01930	AUR58_04360	AYM93_08310	AYO29_08920	AYM38_03870	CBU_1600	hypothetical protein	M	orthologs
1122	AYN00_08425	AYM00_03905	AYM94_08450	AYM02_03775	AYM90_08445	AYM11_03640	AYO24_08445	AYO23_08450	AYM17_01835	AUR58_04215	AYM93_08445	AYO29_09045	AYM38_03730	CBU_1631	hypothetical protein	M	orthologs
1141	AYN00_08535	AYM00_03855	AYM94_08565	AYM02_03730	AYM90_08555	AYM11_03595	AYO24_08520	AYO23_08525	AYM17_01720	AUR58_04160	AYM93_08560	AYO29_00340	AYM38_03685	CBU_1655	bifunctional heptose 7-phosphate kinase/heptose 1-phosphate adenyltransferase	M	orthologs
1142	AYN00_06350	AYM00_03760	AYM94_06225	AYM02_03645	AYM90_06370	AYM11_03515	AYO24_08565	AYO23_08565	AYM17_01715	AUR58_04055	AYM93_06220	AYO29_01720	AYM38_03610	CBU_1657	alpha-L-glycero-D-manno-heptose beta-1,4-glucosyltransferase	M	orthologs
1143	AYN00_06355	AYM00_03755	AYM94_06230	AYM02_03640	AYM90_06375	AYM11_03510	AYO24_08570	AYO23_08570	AYM17_01710	AUR58_04050	AYM93_06225	AYO29_01715	AYM38_03605	CBU_1658	hypothetical protein	M	orthologs
1146	AYN00_06370	AYM00_03740	AYM94_06245	AYM02_03625	AYM90_06390	AYM11_03495	AYO24_08585	AYO23_08585	AYM17_01695	AUR58_04035	AYM93_06240	AYO29_01700	AYM38_03590	CBU_1661	ADP-heptose--LPS heptosyltransferase	M	orthologs
1154	AYN00_06435	AYM00_03675	AYM94_06310	AYM02_03560	AYM90_06455	AYM11_03430	AYO24_08650	AYO23_08650	AYM17_01655	AUR58_03970	AYM93_06305	AYO29_01635	AYM38_03525	CBU_1675	2-dehydro-3-deoxyphosphooctonate aldolase	M	orthologs
1229	AYN00_08885	AYM00_03045	AYM94_08915	AYM02_02970	AYM90_08900	AYM11_02875	AYO24_09205	AYO23_09205	AYM17_00765	AUR58_03325	AYM93_08910	AYO29_01020	AYM38_02935	CBU_1787	glutamine--fructose-6-phosphate aminotransferase	M	orthologs
1237	AYN00_09000	AYM00_02920	AYM94_09030	AYM02_02840	AYM90_09015	AYM11_02750	AYO24_09325	AYO23_09325	AYM17_00840	AUR58_03195	AYM93_09025	AYO29_00395	AYM38_02810	CBU_1810	ABC transporter substrate-binding protein	M	orthologs
1251	AYN00_09095	AYM00_02815	AYM94_09125	AYM02_02745	AYM90_09110	AYM11_02655	AYO24_09420	AYO23_09420	AYM17_00935	AUR58_03090	AYM93_09120	AYO29_00490	AYM38_02715	CBU_1829	lipoprotein localization factor LolB	M	orthologs
1256	AYN00_09125	AYM00_02785	AYM94_09155	AYM02_02715	AYM90_09140	AYM11_02625	AYO24_09450	AYO23_09450	AYM17_00965	AUR58_03060	AYM93_09150	AYO29_00520	AYM38_02685	CBU_1834	glucose-1-phosphate thymidylyltransferase	M	orthologs
1260	AYN00_09145	AYM00_02760	AYM94_09175	AYM02_02690	AYM90_09160	AYM11_02605	AYO24_09470	AYO23_09470	AYM17_00985	AUR58_03030	AYM93_09170	AYO29_00540	AYM38_02665	CBU_1838	dTDP-4-dehydrorhamnose 3,5-epimerase	M	orthologs
1298	AYN00_09395	AYM00_02490	AYM94_09420	AYM02_02430	AYM90_09410	AYM11_02345	AYO24_09720	AYO23_09710	AYM17_01240	AUR58_02770	AYM93_09415	AYO29_00790	AYM38_02400	CBU_1887	peptidase	M	orthologs
1324	AYN00_10115	AYM00_02320	AYM94_09645	AYM02_02265	AYM90_09635	AYM11_02185	AYO24_09880	AYO23_09870	AYM17_00130	AUR58_02590	AYM93_10130	AYO29_00130	AYM38_02235	CBU_1925	16S rRNA (guanine(527)-N(7))-methyltransferase RsmG	M	orthologs
1345	AYN00_10240	AYM00_02200	AYM94_09770	AYM02_02145	AYM90_09760	AYM11_02065	AYO24_10005	AYO23_09995	AYM17_00250	AUR58_02470	AYM93_10255	AYO29_00255	AYM38_02115	CBU_1947	bifunctional N-acetylglucosamine-1-phosphate uridyltransferase/glucosamine-1-phosphate acetyltransferase	M	orthologs
1366	AYN00_10370	AYM00_01305	AYM94_09900	AYM02_01285	AYM90_09890	AYM11_01245	AYO24_00480	AYO23_00485	AYM17_09775	AUR58_01570	AYM93_10385	AYO29_09875	AYM38_01260	CBU_1978	LPS biosynthesis protein	M	orthologs
1387	AYN00_09525	AYM00_01430	AYM94_09955	AYM02_01415	AYM90_09945	AYM11_01365	AYO24_00370	AYO23_00375	AYM17_09895	AUR58_01700	AYM93_09535	AYO29_10000	AYM38_01385	CBU_2004	ADP-heptose--LPS heptosyltransferase	M	orthologs
500	AYN00_03425	AYM00_06935	AYM94_03425	AYM02_06640	AYM90_03440	AYM11_06425	AYO24_03760	AYO23_03770	AYM17_06430	AUR58_07345	AYM93_03415	AYO29_07630	AYM38_06545	CBU_0688	GDP-fucose synthetase	MG	orthologs
594	AYN00_04150	AYM00_07630	AYM94_04150	AYM02_07325	AYM90_04165	AYM11_07105	AYO24_05245	AYO23_05260	AYM17_05700	AUR58_08070	AYM93_04140	AYO29_02275	AYM38_07225	CBU_0829	NAD-dependent dehydratase	MG	orthologs
609	AYN00_04225	AYM00_07705	AYM94_04225	AYM02_07400	AYM90_04240	AYM11_07180	AYO24_05170	AYO23_05185	AYM17_05625	AUR58_08145	AYM93_04215	AYO29_02350	AYM38_07300	CBU_0844	capsular biosynthesis protein CpsI	MG	orthologs
1259	AYN00_09140	AYM00_02765	AYM94_09170	AYM02_02695	AYM90_09155	AYM11_02610	AYO24_09465	AYO23_09465	AYM17_00980	AUR58_03035	AYM93_09165	AYO29_00535	AYM38_02670	CBU_1837	NAD-dependent dehydratase	MG	orthologs
1364	AYN00_10360	AYM00_01295	AYM94_09890	AYM02_01275	AYM90_09880	AYM11_01235	AYO24_00490	AYO23_00495	AYM17_09765	AUR58_01560	AYM93_10375	AYO29_09865	AYM38_01250	CBU_1976	mannose-1-phosphate guanylyltransferase	MJ	orthologs
883	AYN00_06685	AYM00_06070	AYM94_06705	AYM02_05835	AYM90_06705	AYM11_05645	AYO24_06680	AYO23_06695	AYM17_03505	AUR58_06470	AYM93_06700	AYO29_05710	AYM38_05765	CBU_1275	bifunctional D-altronate/D-mannonate dehydratase	MR	orthologs
78	AYN00_00270	AYM00_01140	AYM94_00270	AYM02_01125	AYM90_00275	AYM11_01095	AYO24_00625	AYO23_00630	AYM17_09625	AUR58_01410	AYM93_00265	AYO29_09210	AYM38_01105	CBU_0056	channel protein TolC	MU	orthologs
303	AYN00_01980	AYM00_05310	AYM94_01975	AYM02_05085	AYM90_01995	AYM11_04910	AYO24_02325	AYO23_02330	AYM17_07890	AUR58_05675	AYM93_01970	AYO29_08120	AYM38_05015	CBU_0397	signal peptidase II	MU	orthologs
1238	AYN00_09005	AYM00_02915	AYM94_09035	AYM02_02835	AYM90_09020	AYM11_02745	AYO24_09330	AYO23_09330	AYM17_00845	AUR58_03190	AYM93_09030	AYO29_00400	AYM38_02805	CBU_1811	type I secretion protein TolC	MU	orthologs
148	AYN00_00760	AYM00_00655	AYM94_00755	AYM02_00635	AYM90_00765	AYM11_00620	AYO24_01115	AYO23_01120	AYM17_09150	AUR58_00925	AYM93_00750	AYO29_09390	AYM38_00620	CBU_0153	peptidase A24	NOU	orthologs
149	AYN00_00770	AYM00_00645	AYM94_00765	AYM02_00625	AYM90_00775	AYM11_00610	AYO24_01125	AYO23_01130	AYM17_09140	AUR58_00915	AYM93_00760	AYO29_09380	AYM38_00610	CBU_0155	type 4 pili biogenesis protein (nuleotide-binding protein)	NU	orthologs
150	AYN00_00775	AYM00_00640	AYM94_00770	AYM02_00620	AYM90_00780	AYM11_00605	AYO24_01130	AYO23_01135	AYM17_09135	AUR58_00910	AYM93_00765	AYO29_09375	AYM38_00605	CBU_0156	pilus assembly protein PilA	NU	orthologs
308	AYN00_02040	AYM00_05365	AYM94_02030	AYM02_05145	AYM90_02055	AYM11_04970	AYO24_02385	AYO23_02390	AYM17_07830	AUR58_05745	AYM93_02025	AYO29_08075	AYM38_05080	CBU_0412	type IV pilin	NU	orthologs
331	AYN00_02245	AYM00_10400	AYM94_02235	AYM02_10025	AYM90_02260	AYM11_09720	AYO24_02580	AYO23_02585	AYM17_07630	AUR58_10905	AYM93_02230	AYO29_06980	AYM38_09890	CBU_0453	ferrous iron transporter B	NU	orthologs
1132	AYN00_08490	AYM00_03790	AYM94_08520	AYM02_03670	AYM90_08510	AYM11_03545	AYO24_08510	AYO23_08515	AYM17_01765	AUR58_04095	AYM93_08515	AYO29_09115	AYM38_03635	CBU_1645	ATPase	NU	orthologs
101	AYN00_00445	AYM00_00975	AYM94_00440	AYM02_00955	AYM90_00450	AYM11_00935	AYO24_00800	AYO23_00805	AYM17_09465	AUR58_01245	AYM93_00435	AYO29_09700	AYM38_00940	CBU_0093	7-carboxy-7-deazaguanine synthase	O	orthologs
102	AYN00_00450	AYM00_00970	AYM94_00445	AYM02_00950	AYM90_00455	AYM11_00930	AYO24_00805	AYO23_00810	AYM17_09460	AUR58_01240	AYM93_00440	AYO29_09695	AYM38_00935	CBU_0094	ATP-dependent chaperone ClpB	O	orthologs
158	AYN00_00870	AYM00_00545	AYM94_00865	AYM02_00525	AYM90_00875	AYM11_00510	AYO24_01225	AYO23_01230	AYM17_09010	AUR58_00815	AYM93_00860	AYO29_02715	AYM38_00510	CBU_0176	serine protease	O	orthologs
161	AYN00_00885	AYM00_00530	AYM94_00880	AYM02_00510	AYM90_00890	AYM11_00495	AYO24_01240	AYO23_01245	AYM17_08995	AUR58_00800	AYM93_00875	AYO29_02730	AYM38_00495	CBU_0179	anhydro-N-acetylmuramic acid kinase	O	orthologs
255	AYN00_01550	AYM00_10910	AYM94_01545	AYM02_10540	AYM90_01560	AYM11_10200	AYO24_01905	AYO23_01910	AYM17_08330	AUR58_11440	AYM93_01540	AYO29_03580	AYM38_10380	CBU_0309	molecular chaperone HtpG	O	orthologs
407	AYN00_02720	AYM00_09910	AYM94_02715	AYM02_09530	AYM90_02735	AYM11_09245	AYO24_03060	AYO23_03065	AYM17_07100	AUR58_10400	AYM93_02705	AYO29_06455	AYM38_09410	CBU_0546	heat-shock protein HtpX	O	orthologs
436	AYN00_02890	AYM00_09665	AYM94_02885	AYM02_09285	AYM90_02905	AYM11_09010	AYO24_03225	AYO23_03235	AYM17_06935	AUR58_10145	AYM93_02875	AYO29_06285	AYM38_09170	CBU_0583	glutaredoxin	O	orthologs
467	AYN00_03120	AYM00_06630	AYM94_03115	AYM02_06340	AYM90_03135	AYM11_06130	AYO24_03455	AYO23_03465	AYM17_06725	AUR58_07040	AYM93_03105	AYO29_07920	AYM38_06275	CBU_0630	hypothetical protein	O	orthologs
521	AYN00_03605	AYM00_07080	AYM94_03605	AYM02_06785	AYM90_03620	AYM11_06570	AYO24_03940	AYO23_03955	AYM17_06255	AUR58_07495	AYM93_03595	AYO29_07485	AYM38_06690	CBU_0721	deoxyhypusine synthase	O	orthologs
531	AYN00_03675	AYM00_08975	AYM94_03675	AYM02_08640	AYM90_03690	AYM11_08395	AYO24_05725	AYO23_05740	AYM17_06185	AUR58_09415	AYM93_03665	AYO29_01780	AYM38_08535	CBU_0737	trigger factor	O	orthologs
533	AYN00_03685	AYM00_08965	AYM94_03685	AYM02_08630	AYM90_03700	AYM11_08385	AYO24_05715	AYO23_05730	AYM17_06175	AUR58_09405	AYM93_03675	AYO29_01790	AYM38_08525	CBU_0739	ATP-dependent Clp protease ATP-binding subunit ClpX	O	orthologs
534	AYN00_03690	AYM00_08960	AYM94_03690	AYM02_08625	AYM90_03705	AYM11_08380	AYO24_05710	AYO23_05725	AYM17_06170	AUR58_09400	AYM93_03680	AYO29_01795	AYM38_08520	CBU_0740	DNA-binding protein	O	orthologs
547	AYN00_03765	AYM00_08875	AYM94_03765	AYM02_08545	AYM90_03780	AYM11_08310	AYO24_05635	AYO23_05650	AYM17_06095	AUR58_09315	AYM93_03755	AYO29_01875	AYM38_08445	CBU_0755	endopeptidase	O	orthologs
586	AYN00_04100	AYM00_07580	AYM94_04100	AYM02_07275	AYM90_04115	AYM11_07055	AYO24_05295	AYO23_05310	AYM17_05745	AUR58_08020	AYM93_04090	AYO29_02230	AYM38_07175	CBU_0819	glutathione S-transferase	O	orthologs
640	AYN00_04450	AYM00_07915	AYM94_04450	AYM02_07610	AYM90_04465	AYM11_07390	AYO24_04945	AYO23_04960	AYM17_05400	AUR58_08355	AYM93_04440	AYO29_02555	AYM38_07510	CBU_0889	dihydromonapterin reductase	O	orthologs
687	AYN00_04850	AYM00_08325	AYM94_04850	AYM02_08015	AYM90_04870	AYM11_07790	AYO24_04545	AYO23_04560	AYM17_05020	AUR58_08760	AYM93_04840	AYO29_04345	AYM38_07915	CBU_0963	peroxiredoxin	O	orthologs
713	AYN00_05010	AYM00_08490	AYM94_05010	AYM02_08180	AYM90_05030	AYM11_07950	AYO24_04385	AYO23_04400	AYM17_04855	AUR58_08930	AYM93_05000	AYO29_04180	AYM38_08080	CBU_0996	protoheme IX farnesyltransferase	O	orthologs
785	AYN00_05880	AYM00_09190	AYM94_05900	AYM02_08835	AYM90_05900	AYM11_08580	AYO24_05960	AYO23_05975	AYM17_04245	AUR58_09645	AYM93_05895	AYO29_04985	AYM38_08725	CBU_1123	cytochrome C biogenesis protein	O	orthologs
809	AYN00_06115	AYM00_09445	AYM94_06135	AYM02_09080	AYM90_06135	AYM11_08815	AYO24_06190	AYO23_06205	AYM17_04020	AUR58_09900	AYM93_06130	AYO29_05210	AYM38_08970	CBU_1169	heat-shock protein Hsp20	O	orthologs
825	AYN00_06235	AYM00_06525	AYM94_06565	AYM02_06245	AYM90_06255	AYM11_06045	AYO24_06310	AYO23_06325	AYM17_03905	AUR58_06935	AYM93_06560	AYO29_05335	AYM38_06175	CBU_1193	thioredoxin reductase	O	orthologs
827	AYN00_06250	AYM00_06510	AYM94_06580	AYM02_06230	AYM90_06270	AYM11_06030	AYO24_06325	AYO23_06340	AYM17_03890	AUR58_06920	AYM93_06575	AYO29_05350	AYM38_06160	CBU_1196	ATP-dependent Clp protease ATP-binding subunit ClpA	O	orthologs
857	AYN00_05585	AYM00_06270	AYM94_05605	AYM02_06015	AYM90_05680	AYM11_05815	AYO24_06515	AYO23_06525	AYM17_03680	AUR58_06675	AYM93_05600	AYO29_05545	AYM38_05945	CBU_1240	N(6)-L-threonylcarbamoyladenine synthase TsaD	O	orthologs
886	AYN00_06700	AYM00_06055	AYM94_06720	AYM02_05820	AYM90_06720	AYM11_05630	AYO24_06695	AYO23_06710	AYM17_03490	AUR58_06455	AYM93_06715	AYO29_05725	AYM38_05750	CBU_1278	alkyl hydroperoxide reductase	O	orthologs
894	AYN00_06760	AYM00_05995	AYM94_06780	AYM02_05760	AYM90_06780	AYM11_05570	AYO24_06755	AYO23_06770	AYM17_03430	AUR58_06395	AYM93_06775	AYO29_05785	AYM38_05690	CBU_1289	molecular chaperone DnaJ	O	orthologs
895	AYN00_06765	AYM00_05990	AYM94_06785	AYM02_05755	AYM90_06785	AYM11_05565	AYO24_06760	AYO23_06775	AYM17_03425	AUR58_06390	AYM93_06780	AYO29_05790	AYM38_05685	CBU_1290	molecular chaperone DnaK	O	orthologs
898	AYN00_06780	AYM00_05975	AYM94_06800	AYM02_05740	AYM90_06800	AYM11_05550	AYO24_06775	AYO23_06790	AYM17_03410	AUR58_06375	AYM93_06795	AYO29_05805	AYM38_05670	CBU_1293	molecular chaperone GrpE	O	orthologs
908	AYN00_06840	AYM00_05905	AYM94_06860	AYM02_05675	AYM90_06860	AYM11_05490	AYO24_06835	AYO23_06850	AYM17_03350	AUR58_06305	AYM93_06855	AYO29_05880	AYM38_05605	CBU_1305	SsrA-binding protein	O	orthologs
909	AYN00_06845	AYM00_05900	AYM94_06865	AYM02_05670	AYM90_06865	AYM11_05485	AYO24_06840	AYO23_06855	AYM17_03345	AUR58_06300	AYM93_06860	AYO29_05885	AYM38_05600	CBU_1306	methionine sulfoxide reductase	O	orthologs
937	AYN00_07085	AYM00_05640	AYM94_07105	AYM02_05410	AYM90_07105	AYM11_05230	AYO24_07080	AYO23_07095	AYM17_03115	AUR58_06045	AYM93_07100	AYO29_06120	AYM38_05345	CBU_1352	ATP-dependent metalloprotease	O	orthologs
943	AYN00_07115	AYM00_05610	AYM94_07135	AYM02_05380	AYM90_07135	AYM11_05200	AYO24_07110	AYO23_07125	AYM17_03085	AUR58_06015	AYM93_07130	AYO29_06150	AYM38_05315	CBU_1358	Fe-S cluster assembly protein SufD	O	orthologs
944	AYN00_07120	AYM00_05605	AYM94_07140	AYM02_05375	AYM90_07140	AYM11_05195	AYO24_07115	AYO23_07130	AYM17_03080	AUR58_06010	AYM93_07135	AYO29_06155	AYM38_05310	CBU_1359	Fe-S cluster assembly ATPase SufC	O	orthologs
945	AYN00_07125	AYM00_05600	AYM94_07145	AYM02_05370	AYM90_07145	AYM11_05190	AYO24_07120	AYO23_07135	AYM17_03075	AUR58_06005	AYM93_07140	AYO29_06160	AYM38_05305	CBU_1360	Fe-S cluster assembly protein SufB	O	orthologs
950	AYN00_07170	AYM00_05540	AYM94_07190	AYM02_05315	AYM90_07190	AYM11_05140	AYO24_07165	AYO23_07180	AYM17_03030	AUR58_05940	AYM93_07185	AYO29_04735	AYM38_05255	CBU_1371	tRNA threonylcarbamoyladenosine biosynthesis protein TsaB	O	orthologs
983	AYN00_07410	AYM00_10680	AYM94_07430	AYM02_10320	AYM90_07430	AYM11_09995	AYO24_07410	AYO23_07420	AYM17_02805	AUR58_11200	AYM93_07425	AYO29_07395	AYM38_10170	CBU_1422	DNA repair protein RadA	O	orthologs
1028	AYN00_07710	AYM00_04760	AYM94_07730	AYM02_04545	AYM90_07730	AYM11_04375	AYO24_07720	AYO23_07730	AYM17_02490	AUR58_05105	AYM93_07725	AYO29_08400	AYM38_04485	CBU_1477	alkyl hydroperoxide reductase	O	orthologs
1031	AYN00_07735	AYM00_04715	AYM94_07755	AYM02_04515	AYM90_07755	AYM11_04350	AYO24_07745	AYO23_07755	AYM17_02465	AUR58_05055	AYM93_07750	AYO29_08215	AYM38_04455	CBU_1482	hypothetical protein	O	orthologs
1032	AYN00_07740	AYM00_04710	AYM94_07760	AYM02_04510	AYM90_07760	AYM11_04345	AYO24_07750	AYO23_07760	AYM17_02460	AUR58_05050	AYM93_07755	AYO29_08220	AYM38_04450	CBU_1483	serine protease	O	orthologs
1057	AYN00_07920	AYM00_04485	AYM94_07940	AYM02_04310	AYM90_07940	AYM11_04160	AYO24_07935	AYO23_07945	AYM17_02290	AUR58_04820	AYM93_07935	AYO29_08530	AYM38_04260	CBU_1520	glutaredoxin	O	orthologs
1108	AYN00_08295	AYM00_04035	AYM94_08320	AYM02_03905	AYM90_08315	AYM11_03770	AYO24_08315	AYO23_08320	AYM17_01925	AUR58_04345	AYM93_08315	AYO29_08925	AYM38_03860	CBU_1601	ribosomal protein S6 modification protein	O	orthologs
1175	AYN00_06605	AYM00_03485	AYM94_06480	AYM02_03380	AYM90_06625	AYM11_03255	AYO24_08820	AYO23_08820	AYM17_00280	AUR58_03775	AYM93_06475	AYO29_01475	AYM38_03340	CBU_1706	alkyl hydroperoxide reductase	O	orthologs
1184	AYN00_08540	AYM00_03420	AYM94_08575	AYM02_03315	AYM90_08560	AYM11_03200	AYO24_08875	AYO23_08875	AYM17_00440	AUR58_03710	AYM93_08570	AYO29_01410	AYM38_03280	CBU_1718	molecular chaperone GroEL	O	orthologs
1185	AYN00_08545	AYM00_03415	AYM94_08580	AYM02_03310	AYM90_08565	AYM11_03195	AYO24_08880	AYO23_08880	AYM17_00445	AUR58_03705	AYM93_08575	AYO29_01405	AYM38_03275	CBU_1719	co-chaperone GroES	O	orthologs
1206	AYN00_08695	AYM00_03260	AYM94_08730	AYM02_03165	AYM90_08715	AYM11_03050	AYO24_09025	AYO23_09025	AYM17_00600	AUR58_03550	AYM93_08725	AYO29_01260	AYM38_03125	CBU_1747	stringent starvation protein A	O	orthologs
1286	AYN00_09330	AYM00_02560	AYM94_09355	AYM02_02500	AYM90_09345	AYM11_02415	AYO24_09650	AYO23_09645	AYM17_01175	AUR58_02840	AYM93_09350	AYO29_00725	AYM38_02470	CBU_1873	molecular chaperone DjlA	O	orthologs
1313	AYN00_10055	AYM00_02390	AYM94_09585	AYM02_02330	AYM90_09575	AYM11_02245	AYO24_09820	AYO23_09810	AYM17_00065	AUR58_02665	AYM93_10070	AYO29_00060	AYM38_02300	CBU_1910	hypothetical protein	O	orthologs
1367	AYN00_10375	AYM00_01310	AYM94_09905	AYM02_01290	AYM90_09895	AYM11_01250	AYO24_00475	AYO23_00480	AYM17_09780	AUR58_01575	AYM93_10390	AYO29_09880	AYM38_01265	CBU_1980	peptidylprolyl isomerase	O	orthologs
1393	AYN00_09560	AYM00_01465	AYM94_09990	AYM02_01450	AYM90_09980	AYM11_01400	AYO24_00335	AYO23_00340	AYM17_09930	AUR58_01735	AYM93_09570	AYO29_10035	AYM38_01420	CBU_2011	ATP-dependent protease subunit HslV	O	orthologs
1394	AYN00_09565	AYM00_01470	AYM94_09995	AYM02_01455	AYM90_09985	AYM11_01405	AYO24_00330	AYO23_00335	AYM17_09935	AUR58_01740	AYM93_09575	AYO29_10040	AYM38_01425	CBU_2012	ATP-dependent protease ATP-binding subunit HslU	O	orthologs
532	AYN00_03680	AYM00_08970	AYM94_03680	AYM02_08635	AYM90_03695	AYM11_08390	AYO24_05720	AYO23_05735	AYM17_06180	AUR58_09410	AYM93_03670	AYO29_01785	AYM38_08530	CBU_0738	ATP-dependent Clp protease proteolytic subunit	OU	orthologs
1373	AYN00_10405	AYM00_01340	AYM94_09935	AYM02_01320	AYM90_09925	AYM11_01280	AYO24_00445	AYO23_00450	AYM17_09810	AUR58_01605	AYM93_10420	AYO29_09910	AYM38_01295	CBU_1986	peptidase U7	OU	orthologs
47	AYN00_00060	AYM00_02000	AYM94_00065	AYM02_01955	AYM90_00070	AYM11_01880	AYO24_10190	AYO23_10180	AYM17_01340	AUR58_02275	AYM93_00055	AYO29_00880	AYM38_01920	CBU_0015	phosphate transport regulator	P	orthologs
82	AYN00_00305	AYM00_01105	AYM94_00305	AYM02_01090	AYM90_00310	AYM11_01060	AYO24_00590	AYO23_00595	AYM17_09590	AUR58_01375	AYM93_00300	AYO29_09240	AYM38_01070	CBU_0065	sulfurtransferase	P	orthologs
103	AYN00_00455	AYM00_00965	AYM94_00450	AYM02_00945	AYM90_00460	AYM11_00925	AYO24_00810	AYO23_00815	AYM17_09455	AUR58_01235	AYM93_00445	AYO29_09690	AYM38_00930	CBU_0095	sodium:calcium exchanger	P	orthologs
115	AYN00_00535	AYM00_00880	AYM94_00530	AYM02_00860	AYM90_00540	AYM11_00845	AYO24_00890	AYO23_00895	AYM17_09375	AUR58_01145	AYM93_00525	AYO29_09610	AYM38_00845	CBU_0107	methionine ABC transporter ATP-binding protein	P	orthologs
116	AYN00_00540	AYM00_00875	AYM94_00535	AYM02_00855	AYM90_00545	AYM11_00840	AYO24_00895	AYO23_00900	AYM17_09370	AUR58_01140	AYM93_00530	AYO29_09605	AYM38_00840	CBU_0108	methionine ABC transporter permease	P	orthologs
117	AYN00_00545	AYM00_00870	AYM94_00540	AYM02_00850	AYM90_00550	AYM11_00835	AYO24_00900	AYO23_00905	AYM17_09365	AUR58_01135	AYM93_00535	AYO29_09600	AYM38_00835	CBU_0109	hypothetical protein	P	orthologs
137	AYN00_00685	AYM00_00730	AYM94_00680	AYM02_00710	AYM90_00690	AYM11_00695	AYO24_01040	AYO23_01045	AYM17_09230	AUR58_01000	AYM93_00675	AYO29_09465	AYM38_00695	CBU_0139	carbonate dehydratase	P	orthologs
281	AYN00_01760	AYM00_05090	AYM94_01755	AYM02_04860	AYM90_01770	AYM11_04685	AYO24_02110	AYO23_02115	AYM17_08095	AUR58_05450	AYM93_01750	AYO29_03055	AYM38_04795	CBU_0352	cation transporter	P	orthologs
285	AYN00_01810	AYM00_05140	AYM94_01805	AYM02_04910	AYM90_01820	AYM11_04735	AYO24_02160	AYO23_02170	AYM17_08050	AUR58_05500	AYM93_01800	AYO29_03095	AYM38_04845	CBU_0364	MFS transporter	P	orthologs
330	AYN00_02240	AYM00_10405	AYM94_02230	AYM02_10030	AYM90_02255	AYM11_09725	AYO24_02575	AYO23_02580	AYM17_07635	AUR58_10910	AYM93_02225	AYO29_06985	AYM38_09895	CBU_0452	magnesium/cobalt efflux protein	P	orthologs
335	AYN00_02270	AYM00_10375	AYM94_02260	AYM02_10000	AYM90_02285	AYM11_09695	AYO24_02605	AYO23_02610	AYM17_07605	AUR58_10880	AYM93_02255	AYO29_06955	AYM38_09865	CBU_0459	sodium:proton antiporter	P	orthologs
381	AYN00_02565	AYM00_10075	AYM94_02555	AYM02_09690	AYM90_02580	AYM11_09400	AYO24_02905	AYO23_02910	AYM17_07315	AUR58_10565	AYM93_02550	AYO29_06660	AYM38_09565	CBU_0515	MFS transporter	P	orthologs
420	AYN00_02805	AYM00_09825	AYM94_02800	AYM02_09440	AYM90_02820	AYM11_09160	AYO24_03140	AYO23_03150	AYM17_07020	AUR58_10305	AYM93_02790	AYO29_06370	AYM38_09320	CBU_0565	magnesium/cobalt efflux protein	P	orthologs
439	AYN00_02910	AYM00_09685	AYM94_02905	AYM02_09305	AYM90_02925	AYM11_09030	AYO24_03245	AYO23_03255	AYM17_06915	AUR58_10165	AYM93_02895	AYO29_06265	AYM38_09190	CBU_0587	thiosulfate sulfurtransferase	P	orthologs
510	AYN00_03485	AYM00_06995	AYM94_03485	AYM02_06700	AYM90_03500	AYM11_06485	AYO24_03820	AYO23_03830	AYM17_06370	AUR58_07405	AYM93_03475	AYO29_07570	AYM38_06605	CBU_0700	adenylyltransferase	P	orthologs
511	AYN00_03490	AYM00_07000	AYM94_03490	AYM02_06705	AYM90_03505	AYM11_06490	AYO24_03825	AYO23_03835	AYM17_06365	AUR58_07410	AYM93_03480	AYO29_07565	AYM38_06610	CBU_0701	3'(2'),5'-bisphosphate nucleotidase CysQ	P	orthologs
516	AYN00_03550	AYM00_07065	AYM94_03550	AYM02_06770	AYM90_03565	AYM11_06555	AYO24_03885	AYO23_03900	AYM17_06300	AUR58_07475	AYM93_03540	AYO29_07500	AYM38_06675	CBU_0713	MFS transporter	P	orthologs
679	AYN00_04730	AYM00_08200	AYM94_04730	AYM02_07890	AYM90_04750	AYM11_07665	AYO24_04665	AYO23_04680	AYM17_05130	AUR58_08640	AYM93_04720	AYO29_04450	AYM38_07790	CBU_0943	rhodanese	P	orthologs
870	AYN00_05675	AYM00_06175	AYM94_05695	AYM02_05925	AYM90_05770	AYM11_05725	AYO24_06605	AYO23_06615	AYM17_03590	AUR58_06575	AYM93_05690	AYO29_05635	AYM38_05850	CBU_1259	Na+/H+ antiporter	P	orthologs
904	AYN00_06820	AYM00_05925	AYM94_06840	AYM02_05695	AYM90_06840	AYM11_05510	AYO24_06815	AYO23_06830	AYM17_03370	AUR58_06325	AYM93_06835	AYO29_05860	AYM38_05625	CBU_1301	Fur family transcriptional regulator	P	orthologs
947	AYN00_07135	AYM00_05585	AYM94_07155	AYM02_05355	AYM90_07155	AYM11_05180	AYO24_07130	AYO23_07145	AYM17_03065	AUR58_05985	AYM93_07150	AYO29_06170	AYM38_05290	CBU_1362	cation diffusion facilitator family transporter	P	orthologs
1050	AYN00_07870	AYM00_04535	AYM94_07890	AYM02_04360	AYM90_07890	AYM11_04210	AYO24_07885	AYO23_07895	AYM17_02335	AUR58_04870	AYM93_07885	AYO29_08485	AYM38_04310	CBU_1511	zinc transporter	P	orthologs
1058	AYN00_07925	AYM00_04480	AYM94_07945	AYM02_04305	AYM90_07945	AYM11_04155	AYO24_07940	AYO23_07950	AYM17_02285	AUR58_04815	AYM93_07940	AYO29_08535	AYM38_04255	CBU_1521	sulfurtransferase	P	orthologs
1095	AYN00_08195	AYM00_04155	AYM94_08220	AYM02_04010	AYM90_08215	AYM11_03870	AYO24_08215	AYO23_08220	AYM17_02015	AUR58_04475	AYM93_08215	AYO29_08830	AYM38_03970	CBU_1582	Na+/H+ antiporter subunit G	P	orthologs
1096	AYN00_08205	AYM00_04145	AYM94_08230	AYM02_04000	AYM90_08225	AYM11_03860	AYO24_08225	AYO23_08230	AYM17_02005	AUR58_04465	AYM93_08225	AYO29_08840	AYM38_03960	CBU_1584	sodium:proton antiporter	P	orthologs
1098	AYN00_08215	AYM00_04135	AYM94_08240	AYM02_03990	AYM90_08235	AYM11_03850	AYO24_08235	AYO23_08240	AYM17_01995	AUR58_04455	AYM93_08235	AYO29_08850	AYM38_03950	CBU_1586	cation:proton antiporter	P	orthologs
1177	AYN00_06615	AYM00_03475	AYM94_06490	AYM02_03370	AYM90_06635	AYM11_03245	AYO24_08830	AYO23_08830	AYM17_00290	AUR58_03765	AYM93_06485	AYO29_01465	AYM38_03330	CBU_1708	superoxide dismutase	P	orthologs
1218	AYN00_08825	AYM00_03155	AYM94_08825	AYM02_03065	AYM90_08840	AYM11_02960	AYO24_09120	AYO23_09120	AYM17_00690	AUR58_03440	AYM93_08820	AYO29_01165	AYM38_03030	CBU_1766	ferrous iron transporter B	P	orthologs
1219	AYN00_08830	AYM00_03150	AYM94_08830	AYM02_03060	AYM90_08845	AYM11_02955	AYO24_09125	AYO23_09125	AYM17_00695	AUR58_03435	AYM93_08825	AYO29_01160	AYM38_03025	CBU_1767	iron transporter FeoA	P	orthologs
1221	AYN00_08845	AYM00_03125	AYM94_08845	AYM02_03040	AYM90_08860	AYM11_02940	AYO24_09140	AYO23_09140	AYM17_00710	AUR58_03410	AYM93_08840	AYO29_01145	AYM38_03010	CBU_1770	nitrate ABC transporter ATP-binding protein	P	orthologs
1222	AYN00_08850	AYM00_03120	AYM94_08850	AYM02_03035	AYM90_08865	AYM11_02935	AYO24_09145	AYO23_09145	AYM17_00715	AUR58_03405	AYM93_08845	AYO29_01140	AYM38_03005	CBU_1771	sulfonate ABC transporter permease	P	orthologs
1246	AYN00_09060	AYM00_02850	AYM94_09090	AYM02_02780	AYM90_09075	AYM11_02690	AYO24_09385	AYO23_09385	AYM17_00900	AUR58_03125	AYM93_09085	AYO29_00455	AYM38_02750	CBU_1822	superoxide dismutase	P	orthologs
1416	AYN00_09780	AYM00_01695	AYM94_10215	AYM02_01670	AYM90_10200	AYM11_01620	AYO24_00120	AYO23_00120	AYM17_10125	AUR58_01965	AYM93_09795	AYO29_10240	AYM38_01645	CBU_2055	zinc transporter	P	orthologs
523	AYN00_03620	AYM00_09030	AYM94_03620	AYM02_08695	AYM90_03635	AYM11_08450	AYO24_05780	AYO23_05795	AYM17_06235	AUR58_09470	AYM93_03610	AYO29_01730	AYM38_08590	CBU_0727	ABC transporter permease	Q	orthologs
524	AYN00_03625	AYM00_09025	AYM94_03625	AYM02_08690	AYM90_03640	AYM11_08445	AYO24_05775	AYO23_05790	AYM17_06230	AUR58_09465	AYM93_03615	AYO29_01735	AYM38_08585	CBU_0728	ABC transporter ATP-binding protein	Q	orthologs
525	AYN00_03630	AYM00_09020	AYM94_03630	AYM02_08685	AYM90_03645	AYM11_08440	AYO24_05770	AYO23_05785	AYM17_06225	AUR58_09460	AYM93_03620	AYO29_01740	AYM38_08580	CBU_0729	ABC transporter substrate-binding protein	Q	orthologs
567	AYN00_03935	AYM00_07410	AYM94_03935	AYM02_07110	AYM90_03950	AYM11_06890	AYO24_05465	AYO23_05480	AYM17_05920	AUR58_07845	AYM93_03925	AYO29_02080	AYM38_07010	CBU_0787	AMP-binding protein	Q	orthologs
568	AYN00_03940	AYM00_07415	AYM94_03940	AYM02_07115	AYM90_03955	AYM11_06895	AYO24_05460	AYO23_05475	AYM17_05915	AUR58_07850	AYM93_03930	AYO29_02085	AYM38_07015	CBU_0788	polyketide synthase	Q	orthologs
658	AYN00_04570	AYM00_08045	AYM94_04570	AYM02_07735	AYM90_04590	AYM11_07510	AYO24_04825	AYO23_04840	AYM17_05280	AUR58_08485	AYM93_04560	AYO29_04610	AYM38_07635	CBU_0913	esterase	Q	orthologs
773	AYN00_05775	AYM00_09105	AYM94_05795	AYM02_08765	AYM90_05535	AYM11_08515	AYO24_05845	AYO23_05860	AYM17_04330	AUR58_09550	AYM93_05790	AYO29_04865	AYM38_08655	CBU_1097	alpha-acetolactate decarboxylase	Q	orthologs
781	AYN00_05860	AYM00_09160	AYM94_05880	AYM02_08815	AYM90_05880	AYM11_08560	AYO24_05935	AYO23_05950	AYM17_04265	AUR58_09615	AYM93_05875	AYO29_04960	AYM38_08700	CBU_1119	carboxymethylenebutenolidase	Q	orthologs
92	AYN00_00390	AYM00_01025	AYM94_00390	AYM02_01005	AYM90_00395	AYM11_00985	AYO24_00750	AYO23_00755	AYM17_09515	AUR58_01295	AYM93_00385	AYO29_09750	AYM38_00990	CBU_0084	sulfatase	R	orthologs
94	AYN00_00405	AYM00_01015	AYM94_00400	AYM02_00995	AYM90_00410	AYM11_00975	AYO24_00760	AYO23_00765	AYM17_09505	AUR58_01285	AYM93_00395	AYO29_09740	AYM38_00980	CBU_0086	2-pyrone-4,6-dicarboxylate hydrolase	R	orthologs
95	AYN00_00410	AYM00_01010	AYM94_00405	AYM02_00990	AYM90_00415	AYM11_00970	AYO24_00765	AYO23_00770	AYM17_09500	AUR58_01280	AYM93_00400	AYO29_09735	AYM38_00975	CBU_0087	phosphoglycerol transferase	R	orthologs
177	AYN00_01060	AYM00_00335	AYM94_01055	AYM02_00325	AYM90_01065	AYM11_00310	AYO24_01415	AYO23_01420	AYM17_08820	AUR58_00595	AYM93_01050	AYO29_02910	AYM38_00315	CBU_0214	hypothetical protein	R	orthologs
259	AYN00_01575	AYM00_10885	AYM94_01570	AYM02_10515	AYM90_01585	AYM11_10175	AYO24_01930	AYO23_01935	AYM17_08305	AUR58_11415	AYM93_01565	AYO29_03605	AYM38_10355	CBU_0314	hydroxyacylglutathione hydrolase	R	orthologs
264	AYN00_01625	AYM00_10835	AYM94_01620	AYM02_10465	AYM90_01635	AYM11_10125	AYO24_01980	AYO23_01985	AYM17_08245	AUR58_11365	AYM93_01615	AYO29_03650	AYM38_10305	CBU_0322	hypothetical protein	R	orthologs
278	AYN00_01745	AYM00_05075	AYM94_01740	AYM02_04845	AYM90_01755	AYM11_04670	AYO24_02095	AYO23_02100	AYM17_08110	AUR58_05435	AYM93_01735	AYO29_03040	AYM38_04780	CBU_0349	phosphoglycolate phosphatase	R	orthologs
284	AYN00_01800	AYM00_05130	AYM94_01795	AYM02_04900	AYM90_01810	AYM11_04725	AYO24_02150	AYO23_02160	AYM17_08060	AUR58_05490	AYM93_01790	AYO29_03085	AYM38_04835	CBU_0362	amidohydrolase	R	orthologs
298	AYN00_01930	AYM00_05260	AYM94_01925	AYM02_05035	AYM90_01945	AYM11_04860	AYO24_02275	AYO23_02280	AYM17_07935	AUR58_05625	AYM93_01920	AYO29_08175	AYM38_04965	CBU_0387	GTPase ObgE	R	orthologs
300	AYN00_01950	AYM00_05280	AYM94_01945	AYM02_05055	AYM90_01965	AYM11_04880	AYO24_02295	AYO23_02300	AYM17_07915	AUR58_05645	AYM93_01940	AYO29_08150	AYM38_04985	CBU_0390	murein biosynthesis protein MurJ	R	orthologs
316	AYN00_02135	AYM00_05455	AYM94_02125	AYM02_05235	AYM90_02150	AYM11_05060	AYO24_02470	AYO23_02475	AYM17_07740	AUR58_05835	AYM93_02120	AYO29_07090	AYM38_05170	CBU_0431	glycine cleavage system protein T	R	orthologs
329	AYN00_02235	AYM00_10410	AYM94_02225	AYM02_10035	AYM90_02250	AYM11_09730	AYO24_02570	AYO23_02575	AYM17_07640	AUR58_10915	AYM93_02220	AYO29_06990	AYM38_09900	CBU_0451	cytochrome C assembly protein	R	orthologs
368	AYN00_02470	AYM00_10175	AYM94_02460	AYM02_09795	AYM90_02485	AYM11_09495	AYO24_02805	AYO23_02810	AYM17_07410	AUR58_10670	AYM93_02455	AYO29_06755	AYM38_09660	CBU_0498	hypothetical protein	R	orthologs
408	AYN00_02725	AYM00_09905	AYM94_02720	AYM02_09525	AYM90_02740	AYM11_09240	AYO24_03065	AYO23_03070	AYM17_07095	AUR58_10395	AYM93_02710	AYO29_06450	AYM38_09405	CBU_0547	hypothetical protein	R	orthologs
422	AYN00_02815	AYM00_09815	AYM94_02810	AYM02_09430	AYM90_02830	AYM11_09150	AYO24_03150	AYO23_03160	AYM17_07010	AUR58_10295	AYM93_02800	AYO29_06360	AYM38_09310	CBU_0567	rRNA maturation RNase YbeY	R	orthologs
455	AYN00_03050	AYM00_09555	AYM94_03045	AYM02_09185	AYM90_03065	AYM11_08915	AYO24_03380	AYO23_03390	AYM17_06795	AUR58_10025	AYM93_03035	AYO29_07115	AYM38_09070	CBU_0616	hydrolase	R	orthologs
459	AYN00_03075	AYM00_06575	AYM94_03070	AYM02_06290	AYM90_03090	AYM11_06085	AYO24_03410	AYO23_03420	AYM17_06770	AUR58_06985	AYM93_03060	AYO29_07965	AYM38_06225	CBU_0621	UDP-N-acetyl-D-glucosamine dehydrogenase	R	orthologs
471	AYN00_03145	AYM00_06655	AYM94_03140	AYM02_06365	AYM90_03160	AYM11_06155	AYO24_03480	AYO23_03490	AYM17_06700	AUR58_07065	AYM93_03130	AYO29_07895	AYM38_06300	CBU_0636	hypothetical protein	R	orthologs
484	AYN00_03210	AYM00_06720	AYM94_03205	AYM02_06430	AYM90_03225	AYM11_06220	AYO24_03545	AYO23_03555	AYM17_06635	AUR58_07130	AYM93_03195	AYO29_07830	AYM38_06365	CBU_0649	permease	R	orthologs
512	AYN00_03495	AYM00_07005	AYM94_03495	AYM02_06710	AYM90_03510	AYM11_06495	AYO24_03830	AYO23_03840	AYM17_06360	AUR58_07415	AYM93_03485	AYO29_07560	AYM38_06615	CBU_0702	short-chain dehydrogenase	R	orthologs
526	AYN00_03635	AYM00_09015	AYM94_03635	AYM02_08680	AYM90_03650	AYM11_08435	AYO24_05765	AYO23_05780	AYM17_06220	AUR58_09455	AYM93_03625	AYO29_01745	AYM38_08575	CBU_0730	hypothetical protein	R	orthologs
535	AYN00_03695	AYM00_08955	AYM94_03695	AYM02_08620	AYM90_03710	AYM11_08375	AYO24_05705	AYO23_05720	AYM17_06165	AUR58_09395	AYM93_03685	AYO29_01800	AYM38_08515	CBU_0741	metalloprotease PmbA	R	orthologs
539	AYN00_03720	AYM00_08930	AYM94_03720	AYM02_08595	AYM90_03735	AYM11_08355	AYO24_05680	AYO23_05695	AYM17_06140	AUR58_09370	AYM93_03710	AYO29_01825	AYM38_08490	CBU_0746	LPS export ABC transporter ATP-binding protein	R	orthologs
542	AYN00_03735	AYM00_08915	AYM94_03735	AYM02_08580	AYM90_03750	AYM11_08340	AYO24_05665	AYO23_05680	AYM17_06125	AUR58_09355	AYM93_03725	AYO29_01840	AYM38_08475	CBU_0749	phenylphosphate carboxylase subunit delta	R	orthologs
550	AYN00_03780	AYM00_08860	AYM94_03780	AYM02_08530	AYM90_03795	AYM11_08295	AYO24_05620	AYO23_05635	AYM17_06080	AUR58_09300	AYM93_03770	AYO29_01890	AYM38_08430	CBU_0758	competence protein ComL	R	orthologs
576	AYN00_04010	AYM00_07485	AYM94_04010	AYM02_07185	AYM90_04025	AYM11_06965	AYO24_05390	AYO23_05405	AYM17_05835	AUR58_07920	AYM93_04000	AYO29_02150	AYM38_07085	CBU_0801	ribosomal-protein-alanine acetyltransferase	R	orthologs
582	AYN00_04050	AYM00_07525	AYM94_04050	AYM02_07225	AYM90_04065	AYM11_07005	AYO24_05350	AYO23_05365	AYM17_05795	AUR58_07960	AYM93_04040	AYO29_02190	AYM38_07125	CBU_0809	LPS export ABC transporter permease LptF	R	orthologs
583	AYN00_04055	AYM00_07530	AYM94_04055	AYM02_07230	AYM90_04070	AYM11_07010	AYO24_05345	AYO23_05360	AYM17_05790	AUR58_07965	AYM93_04045	AYO29_02195	AYM38_07130	CBU_0810	LPS export ABC transporter permease LptG	R	orthologs
593	AYN00_04145	AYM00_07625	AYM94_04145	AYM02_07320	AYM90_04160	AYM11_07100	AYO24_05250	AYO23_05265	AYM17_05705	AUR58_08065	AYM93_04135	AYO29_02270	AYM38_07220	CBU_0828	oxidoreductase	R	orthologs
597	AYN00_04165	AYM00_07645	AYM94_04165	AYM02_07340	AYM90_04180	AYM11_07120	AYO24_05230	AYO23_05245	AYM17_05685	AUR58_08085	AYM93_04155	AYO29_02290	AYM38_07240	CBU_0832	acetyltransferase	R	orthologs
601	AYN00_04185	AYM00_07665	AYM94_04185	AYM02_07360	AYM90_04200	AYM11_07140	AYO24_05210	AYO23_05225	AYM17_05665	AUR58_08105	AYM93_04175	AYO29_02310	AYM38_07260	CBU_0836	radical SAM protein	R	orthologs
611	AYN00_04240	AYM00_07720	AYM94_04240	AYM02_07415	AYM90_04255	AYM11_07195	AYO24_05155	AYO23_05170	AYM17_05610	AUR58_08160	AYM93_04230	AYO29_02365	AYM38_07315	CBU_0847	3-hydroxy-2-methylbutyryl-CoA dehydrogenase	R	orthologs
641	AYN00_04455	AYM00_07920	AYM94_04455	AYM02_07615	AYM90_04470	AYM11_07395	AYO24_04940	AYO23_04955	AYM17_05395	AUR58_08360	AYM93_04445	AYO29_02560	AYM38_07515	CBU_0890	Zn-dependent hydrolase	R	orthologs
647	AYN00_04485	AYM00_07950	AYM94_04485	AYM02_07645	AYM90_04500	AYM11_07425	AYO24_04910	AYO23_04925	AYM17_05365	AUR58_08390	AYM93_04475	AYO29_02590	AYM38_07545	CBU_0896	colicin V synthesis protein	R	orthologs
655	AYN00_04555	AYM00_08020	AYM94_04555	AYM02_07715	AYM90_04575	AYM11_07495	AYO24_04840	AYO23_04855	AYM17_05295	AUR58_08460	AYM93_04545	AYO29_02670	AYM38_07615	CBU_0910	hypothetical protein	R	orthologs
657	AYN00_04565	AYM00_08040	AYM94_04565	AYM02_07730	AYM90_04585	AYM11_07505	AYO24_04830	AYO23_04845	AYM17_05285	AUR58_08480	AYM93_04555	AYO29_04615	AYM38_07630	CBU_0912	2-methylcitrate dehydratase	R	orthologs
661	AYN00_04585	AYM00_08060	AYM94_04585	AYM02_07750	AYM90_04605	AYM11_07525	AYO24_04810	AYO23_04825	AYM17_05265	AUR58_08500	AYM93_04575	AYO29_04590	AYM38_07650	CBU_0916	hypothetical protein	R	orthologs
665	AYN00_04630	AYM00_08100	AYM94_04630	AYM02_07790	AYM90_04650	AYM11_07565	AYO24_04765	AYO23_04780	AYM17_05230	AUR58_08540	AYM93_04620	AYO29_04550	AYM38_07690	CBU_0924	SAM-dependent methyltransferase	R	orthologs
668	AYN00_04655	AYM00_08125	AYM94_04655	AYM02_07815	AYM90_04675	AYM11_07590	AYO24_04740	AYO23_04755	AYM17_05205	AUR58_08565	AYM93_04645	AYO29_04525	AYM38_07715	CBU_0929	short-chain dehydrogenase	R	orthologs
716	AYN00_05025	AYM00_08515	AYM94_05025	AYM02_08200	AYM90_05045	AYM11_07965	AYO24_04370	AYO23_04385	AYM17_04840	AUR58_08955	AYM93_05015	AYO29_04165	AYM38_08100	CBU_0999	GTPase HflX	R	orthologs
722	AYN00_05055	AYM00_08545	AYM94_05055	AYM02_08230	AYM90_05075	AYM11_07995	AYO24_04340	AYO23_04355	AYM17_04810	AUR58_08985	AYM93_05045	AYO29_04135	AYM38_08130	CBU_1005	carboxylesterase	R	orthologs
728	AYN00_05155	AYM00_08660	AYM94_05155	AYM02_08340	AYM90_05175	AYM11_08110	AYO24_04245	AYO23_04260	AYM17_04705	AUR58_09100	AYM93_05145	AYO29_04050	AYM38_08235	CBU_1027	ATPase	R	orthologs
729	AYN00_05175	AYM00_08680	AYM94_05175	AYM02_08360	AYM90_05195	AYM11_08130	AYO24_04225	AYO23_04240	AYM17_04685	AUR58_09120	AYM93_05165	AYO29_04030	AYM38_08255	CBU_1031	lysozyme	R	orthologs
742	AYN00_05290	AYM00_08805	AYM94_05295	AYM02_08485	AYM90_05310	AYM11_08250	AYO24_04110	AYO23_04125	AYM17_04550	AUR58_09245	AYM93_05285	AYO29_03905	AYM38_08380	CBU_1053	recombinase RecX	R	orthologs
744	AYN00_05300	AYM00_08815	AYM94_05305	AYM02_08495	AYM90_05320	AYM11_08260	AYO24_04100	AYO23_04115	AYM17_04540	AUR58_09255	AYM93_05295	AYO29_03895	AYM38_08390	CBU_1055	damage-inducible protein CinA	R	orthologs
765	AYN00_05460	AYM00_09040	AYM94_05485	AYM02_08705	AYM90_05480	AYM11_08460	AYO24_05790	AYO23_05805	AYM17_04385	AUR58_09485	AYM93_05480	AYO29_04885	AYM38_08600	CBU_1087	tRNA (N6-adenosine(37)-N6)-threonylcarbamoyltransferase complex ATPase TsaE	R	orthologs
793	AYN00_05945	AYM00_09265	AYM94_05965	AYM02_08905	AYM90_05965	AYM11_08645	AYO24_06025	AYO23_06040	AYM17_04175	AUR58_09720	AYM93_05960	AYO29_05050	AYM38_08795	CBU_1136	hypothetical protein	R	orthologs
803	AYN00_06025	AYM00_09355	AYM94_06045	AYM02_08990	AYM90_06045	AYM11_08725	AYO24_06105	AYO23_06120	AYM17_04100	AUR58_09810	AYM93_06040	AYO29_05130	AYM38_08880	CBU_1151	HAD family hydrolase	R	orthologs
844	AYN00_05515	AYM00_06350	AYM94_05535	AYM02_06090	AYM90_05610	AYM11_05885	AYO24_06445	AYO23_06455	AYM17_03750	AUR58_06755	AYM93_05530	AYO29_05470	AYM38_06015	CBU_1225	haloalkane dehalogenase	R	orthologs
851	AYN00_05555	AYM00_06300	AYM94_05575	AYM02_06045	AYM90_05650	AYM11_05845	AYO24_06485	AYO23_06495	AYM17_03710	AUR58_06705	AYM93_05570	AYO29_05515	AYM38_05975	CBU_1234	ATPase	R	orthologs
854	AYN00_05570	AYM00_06285	AYM94_05590	AYM02_06030	AYM90_05665	AYM11_05830	AYO24_06500	AYO23_06510	AYM17_03695	AUR58_06690	AYM93_05585	AYO29_05530	AYM38_05960	CBU_1237	twitching motility protein PilT	R	orthologs
860	AYN00_05610	AYM00_06240	AYM94_05630	AYM02_05990	AYM90_05705	AYM11_05790	AYO24_06540	AYO23_06550	AYM17_03655	AUR58_06640	AYM93_05625	AYO29_05570	AYM38_05915	CBU_1245	ribosome biogenesis GTPase Der	R	orthologs
865	AYN00_05640	AYM00_06210	AYM94_05660	AYM02_05960	AYM90_05735	AYM11_05760	AYO24_06570	AYO23_06580	AYM17_03625	AUR58_06610	AYM93_05655	AYO29_05600	AYM38_05885	CBU_1252	bifunctional tRNA (adenosine(37)-C2)-methyltransferase TrmG/ribosomal RNA large subunit methyltransferase RlmN	R	orthologs
887	AYN00_06705	AYM00_06050	AYM94_06725	AYM02_05815	AYM90_06725	AYM11_05625	AYO24_06700	AYO23_06715	AYM17_03485	AUR58_06450	AYM93_06720	AYO29_05730	AYM38_05745	CBU_1279	sugar transporter	R	orthologs
893	AYN00_06740	AYM00_06015	AYM94_06760	AYM02_05780	AYM90_06760	AYM11_05590	AYO24_06735	AYO23_06750	AYM17_03450	AUR58_06415	AYM93_06755	AYO29_05765	AYM38_05710	CBU_1284	ATPase	R	orthologs
897	AYN00_06775	AYM00_05980	AYM94_06795	AYM02_05745	AYM90_06795	AYM11_05555	AYO24_06770	AYO23_06785	AYM17_03415	AUR58_06380	AYM93_06790	AYO29_05800	AYM38_05675	CBU_1292	hypothetical protein	R	orthologs
899	AYN00_06785	AYM00_05970	AYM94_06805	AYM02_05735	AYM90_06805	AYM11_05545	AYO24_06780	AYO23_06795	AYM17_03405	AUR58_06370	AYM93_06800	AYO29_05810	AYM38_05665	CBU_1294	twitching motility protein PilT	R	orthologs
925	AYN00_06985	AYM00_05760	AYM94_07005	AYM02_05530	AYM90_07005	AYM11_05345	AYO24_06980	AYO23_06995	AYM17_03215	AUR58_06165	AYM93_07000	AYO29_06020	AYM38_05460	CBU_1331	inosine-5-monophosphate dehydrogenase	R	orthologs
926	AYN00_06990	AYM00_05755	AYM94_07010	AYM02_05525	AYM90_07010	AYM11_05340	AYO24_06985	AYO23_07000	AYM17_03210	AUR58_06160	AYM93_07005	AYO29_06025	AYM38_05455	CBU_1333	hypothetical protein	R	orthologs
939	AYN00_07095	AYM00_05630	AYM94_07115	AYM02_05400	AYM90_07115	AYM11_05220	AYO24_07090	AYO23_07105	AYM17_03105	AUR58_06035	AYM93_07110	AYO29_06130	AYM38_05335	CBU_1354	FeS assembly SUF system protein SufT	R	orthologs
1011	AYN00_07600	AYM00_04885	AYM94_07620	AYM02_04655	AYM90_07620	AYM11_04485	AYO24_07605	AYO23_07615	AYM17_02605	AUR58_05235	AYM93_07615	AYO29_08285	AYM38_04600	CBU_1458	ATPase	R	orthologs
1018	AYN00_07660	AYM00_04815	AYM94_07680	AYM02_04595	AYM90_07680	AYM11_04425	AYO24_07670	AYO23_07680	AYM17_02540	AUR58_05165	AYM93_07675	AYO29_08350	AYM38_04540	CBU_1467	metalloprotease TldD	R	orthologs
1037	AYN00_07775	AYM00_04670	AYM94_07795	AYM02_04475	AYM90_07795	AYM11_04310	AYO24_07785	AYO23_07795	AYM17_02425	AUR58_05010	AYM93_07790	AYO29_08255	AYM38_04420	CBU_1490	XRE family transcriptional regulator	R	orthologs
1038	AYN00_07780	AYM00_04665	AYM94_07800	AYM02_04470	AYM90_07800	AYM11_04305	AYO24_07790	AYO23_07800	AYM17_02420	AUR58_05005	AYM93_07795	AYO29_08260	AYM38_04415	CBU_1491	plasmid maintenance system killer protein	R	orthologs
1042	AYN00_07825	AYM00_04590	AYM94_07845	AYM02_04410	AYM90_07845	AYM11_04255	AYO24_07840	AYO23_07850	AYM17_02380	AUR58_04925	AYM93_07840	AYO29_08440	AYM38_04355	CBU_1502	GTPase Era	R	orthologs
1046	AYN00_07845	AYM00_04560	AYM94_07865	AYM02_04385	AYM90_07865	AYM11_04235	AYO24_07860	AYO23_07870	AYM17_02360	AUR58_04895	AYM93_07860	AYO29_08460	AYM38_04335	CBU_1506	thioesterase	R	orthologs
1051	AYN00_07875	AYM00_04530	AYM94_07895	AYM02_04355	AYM90_07895	AYM11_04205	AYO24_07890	AYO23_07900	AYM17_02330	AUR58_04865	AYM93_07890	AYO29_08490	AYM38_04305	CBU_1512	sulfurtransferase	R	orthologs
1052	AYN00_07880	AYM00_04525	AYM94_07900	AYM02_04350	AYM90_07900	AYM11_04200	AYO24_07895	AYO23_07905	AYM17_02325	AUR58_04860	AYM93_07895	AYO29_08495	AYM38_04300	CBU_1513	NAD(P)-dependent oxidoreductase	R	orthologs
1092	AYN00_08175	AYM00_04175	AYM94_08200	AYM02_04030	AYM90_08195	AYM11_03890	AYO24_08195	AYO23_08200	AYM17_02025	AUR58_04495	AYM93_08195	AYO29_08810	AYM38_03990	CBU_1579	NAD(P)H-quinone oxidoreductase	R	orthologs
1093	AYN00_08180	AYM00_04170	AYM94_08205	AYM02_04025	AYM90_08200	AYM11_03885	AYO24_08200	AYO23_08205	AYM17_02020	AUR58_04490	AYM93_08200	AYO29_08815	AYM38_03985	CBU_1580	ATPase	R	orthologs
1110	AYN00_08305	AYM00_04025	AYM94_08330	AYM02_03895	AYM90_08325	AYM11_03760	AYO24_08325	AYO23_08330	AYM17_01915	AUR58_04335	AYM93_08325	AYO29_08935	AYM38_03850	CBU_1603	succinylglutamate desuccinylase	R	orthologs
1127	AYN00_08460	AYM00_03870	AYM94_08485	AYM02_03740	AYM90_08480	AYM11_03605	AYO24_08480	AYO23_08485	AYM17_01795	AUR58_04180	AYM93_08480	AYO29_09085	AYM38_03695	CBU_1638	ATPase	R	orthologs
1151	AYN00_06420	AYM00_03690	AYM94_06295	AYM02_03575	AYM90_06440	AYM11_03445	AYO24_08635	AYO23_08635	AYM17_01670	AUR58_03985	AYM93_06290	AYO29_01650	AYM38_03540	CBU_1671	5'/3'-nucleotidase SurE	R	orthologs
1170	AYN00_06570	AYM00_03525	AYM94_06445	AYM02_03420	AYM90_06590	AYM11_03290	AYO24_08785	AYO23_08785	AYM17_01530	AUR58_03820	AYM93_06440	AYO29_01510	AYM38_03380	CBU_1698	ATPase	R	orthologs
1200	AYN00_08655	AYM00_03295	AYM94_08690	AYM02_03200	AYM90_08675	AYM11_03085	AYO24_08985	AYO23_08985	AYM17_00560	AUR58_03585	AYM93_08685	AYO29_01295	AYM38_03160	CBU_1739	methyltransferase	R	orthologs
1203	AYN00_08680	AYM00_03275	AYM94_08715	AYM02_03180	AYM90_08700	AYM11_03065	AYO24_09010	AYO23_09010	AYM17_00585	AUR58_03565	AYM93_08710	AYO29_01275	AYM38_03140	CBU_1744	phospholipid-binding protein	R	orthologs
1204	AYN00_08685	AYM00_03270	AYM94_08720	AYM02_03175	AYM90_08705	AYM11_03060	AYO24_09015	AYO23_09015	AYM17_00590	AUR58_03560	AYM93_08715	AYO29_01270	AYM38_03135	CBU_1745	peptidase M50	R	orthologs
1205	AYN00_08690	AYM00_03265	AYM94_08725	AYM02_03170	AYM90_08710	AYM11_03055	AYO24_09020	AYO23_09020	AYM17_00595	AUR58_03555	AYM93_08720	AYO29_01265	AYM38_03130	CBU_1746	stringent starvation protein B	R	orthologs
1220	AYN00_08840	AYM00_03140	AYM94_08840	AYM02_03050	AYM90_08855	AYM11_02945	AYO24_09135	AYO23_09135	AYM17_00705	AUR58_03425	AYM93_08835	AYO29_01150	AYM38_03015	CBU_1769	alpha/beta hydrolase	R	orthologs
1223	AYN00_08855	AYM00_03115	AYM94_08855	AYM02_03030	AYM90_08870	AYM11_02930	AYO24_09150	AYO23_09150	AYM17_00720	AUR58_03400	AYM93_08850	AYO29_01135	AYM38_03000	CBU_1772	GTP-binding protein	R	orthologs
1261	AYN00_09150	AYM00_02755	AYM94_09180	AYM02_02685	AYM90_09165	AYM11_02600	AYO24_09475	AYO23_09475	AYM17_00990	AUR58_03025	AYM93_09175	AYO29_00545	AYM38_02660	CBU_1839	aminobutyraldehyde dehydrogenase	R	orthologs
1290	AYN00_09350	AYM00_02535	AYM94_09375	AYM02_02475	AYM90_09365	AYM11_02390	AYO24_09675	AYO23_09665	AYM17_01195	AUR58_02815	AYM93_09370	AYO29_00745	AYM38_02445	CBU_1877	ATPase	R	orthologs
1305	AYN00_10010	AYM00_02435	AYM94_09540	AYM02_02375	AYM90_09530	AYM11_02290	AYO24_09775	AYO23_09765	AYM17_00020	AUR58_02710	AYM93_10025	AYO29_00015	AYM38_02345	CBU_1901	peptidase M16	R	orthologs
1306	AYN00_10015	AYM00_02430	AYM94_09545	AYM02_02370	AYM90_09535	AYM11_02285	AYO24_09780	AYO23_09770	AYM17_00025	AUR58_02705	AYM93_10030	AYO29_00020	AYM38_02340	CBU_1902	peptidase M16	R	orthologs
1322	AYN00_10105	AYM00_02330	AYM94_09635	AYM02_02275	AYM90_09625	AYM11_02195	AYO24_09870	AYO23_09860	AYM17_00115	AUR58_02600	AYM93_10120	AYO29_00115	AYM38_02245	CBU_1922	tRNA uridine(34) 5-carboxymethylaminomethyl synthesis GTPase MnmE	R	orthologs
1328	AYN00_10135	AYM00_02300	AYM94_09665	AYM02_02245	AYM90_09655	AYM11_02165	AYO24_09900	AYO23_09890	AYM17_00150	AUR58_02570	AYM93_10150	AYO29_00150	AYM38_02215	CBU_1929	MFS transporter	R	orthologs
1348	AYN00_10260	AYM00_02180	AYM94_09790	AYM02_02125	AYM90_09780	AYM11_02045	AYO24_10025	AYO23_10015	AYM17_01505	AUR58_02450	AYM93_10275	AYO29_00280	AYM38_02095	CBU_1952	ABC transporter ATP-binding protein	R	orthologs
1363	AYN00_10355	AYM00_01290	AYM94_09885	AYM02_01270	AYM90_09875	AYM11_01230	AYO24_00495	AYO23_00500	AYM17_09760	AUR58_01555	AYM93_10370	AYO29_09860	AYM38_01245	CBU_1975	carboxylesterase	R	orthologs
1365	AYN00_10365	AYM00_01300	AYM94_09895	AYM02_01280	AYM90_09885	AYM11_01240	AYO24_00485	AYO23_00490	AYM17_09770	AUR58_01565	AYM93_10380	AYO29_09870	AYM38_01255	CBU_1977	phosphotransferase	R	orthologs
1400	AYN00_09600	AYM00_01510	AYM94_10035	AYM02_01490	AYM90_10020	AYM11_01440	AYO24_00295	AYO23_00295	AYM17_09970	AUR58_01775	AYM93_09615	AYO29_10075	AYM38_01460	CBU_2019	ubiquinone biosynthesis regulatory protein kinase UbiB	R	orthologs
1436	AYN00_09915	AYM00_01845	AYM94_10350	AYM02_01810	AYM90_10335	AYM11_01755	AYO24_10250	AYO23_10240	AYM17_10260	AUR58_02120	AYM93_09930	AYO29_10370	AYM38_01785	CBU_2083	7-cyano-7-deazaguanine synthase	R	orthologs
1439	AYN00_09940	AYM00_01870	AYM94_10375	AYM02_01830	AYM90_10360	AYM11_01770	AYO24_10290	AYO23_10280	AYM17_10285	AUR58_02145	AYM93_09955	AYO29_10400	AYM38_01805	CBU_2088	transporter	R	orthologs
1442	AYN00_09955	AYM00_01885	AYM94_10390	AYM02_01845	AYM90_10375	AYM11_01785	AYO24_10305	AYO23_10295	AYM17_10300	AUR58_02160	AYM93_09970	AYO29_10415	AYM38_01820	CBU_2091	alanine racemase	R	orthologs
42	AYN00_00015	AYM00_01955	AYM94_00020	AYM02_01910	AYM90_00025	AYM11_01835	AYO24_10235	AYO23_10225	AYM17_01295	AUR58_02230	AYM93_00010	AYO29_00835	AYM38_01875	CBU_0007	antitoxin	S	orthologs
44	AYN00_00030	AYM00_01970	AYM94_00035	AYM02_01925	AYM90_00040	AYM11_01850	AYO24_10220	AYO23_10210	AYM17_01310	AUR58_02245	AYM93_00025	AYO29_00850	AYM38_01890	CBU_0008a	hypothetical protein	S	orthologs
70	AYN00_00215	AYM00_01195	AYM94_00215	AYM02_01180	AYM90_00220	AYM11_01150	AYO24_00680	AYO23_00685	AYM17_09680	AUR58_01465	AYM93_00210	AYO29_09155	AYM38_01160	CBU_0044	hypothetical protein	S	orthologs
75	AYN00_00255	AYM00_01155	AYM94_00255	AYM02_01140	AYM90_00260	AYM11_01110	AYO24_00640	AYO23_00645	AYM17_09640	AUR58_01425	AYM93_00250	AYO29_09195	AYM38_01120	CBU_0053	endopeptidase IV	S	orthologs
85	AYN00_00325	AYM00_01085	AYM94_00325	AYM02_01070	AYM90_00330	AYM11_01040	AYO24_00570	AYO23_00575	AYM17_09570	AUR58_01360	AYM93_00320	AYO29_09260	AYM38_01050	CBU_0067	hypothetical protein	S	orthologs
100	AYN00_00440	AYM00_00980	AYM94_00435	AYM02_00960	AYM90_00445	AYM11_00940	AYO24_00795	AYO23_00800	AYM17_09470	AUR58_01250	AYM93_00430	AYO29_09705	AYM38_00945	CBU_0092	tol-pal system protein	S	orthologs
121	AYN00_00580	AYM00_00835	AYM94_00575	AYM02_00815	AYM90_00585	AYM11_00800	AYO24_00935	AYO23_00940	AYM17_09330	AUR58_01105	AYM93_00570	AYO29_09565	AYM38_00800	CBU_0115	division/cell wall cluster transcriptional repressor MraZ	S	orthologs
145	AYN00_00745	AYM00_00670	AYM94_00740	AYM02_00650	AYM90_00750	AYM11_00635	AYO24_01100	AYO23_01105	AYM17_09165	AUR58_00940	AYM93_00735	AYO29_09405	AYM38_00635	CBU_0150	cell division protein ZapD	S	orthologs
146	AYN00_00750	AYM00_00665	AYM94_00745	AYM02_00645	AYM90_00755	AYM11_00630	AYO24_01105	AYO23_01110	AYM17_09160	AUR58_00935	AYM93_00740	AYO29_09400	AYM38_00630	CBU_0151	preQ(1) synthase	S	orthologs
222	AYN00_01345	AYM00_00045	AYM94_01340	AYM02_00040	AYM90_01355	AYM11_00025	AYO24_01700	AYO23_01705	AYM17_08535	AUR58_00295	AYM93_01335	AYO29_03370	AYM38_00030	CBU_0270	trans-2-enoyl-CoA reductase	S	orthologs
247	AYN00_01505	AYM00_10955	AYM94_01500	AYM02_10585	AYM90_01515	AYM11_10245	AYO24_01860	AYO23_01865	AYM17_08375	AUR58_11485	AYM93_01495	AYO29_03535	AYM38_10425	CBU_0300	hypothetical protein	S	orthologs
293	AYN00_01885	AYM00_05215	AYM94_01880	AYM02_04985	AYM90_01900	AYM11_04815	AYO24_02235	AYO23_02245	AYM17_07980	AUR58_05575	AYM93_01875	AYO29_03185	AYM38_04920	CBU_0381	hypothetical protein	S	orthologs
336	AYN00_02275	AYM00_10370	AYM94_02265	AYM02_09995	AYM90_02290	AYM11_09690	AYO24_02610	AYO23_02615	AYM17_07600	AUR58_10875	AYM93_02260	AYO29_06950	AYM38_09860	CBU_0460	hypothetical protein	S	orthologs
349	AYN00_02370	AYM00_10275	AYM94_02360	AYM02_09900	AYM90_02385	AYM11_09595	AYO24_02705	AYO23_02710	AYM17_07510	AUR58_10780	AYM93_02355	AYO29_06855	AYM38_09765	CBU_0478a	hypothetical protein	S	orthologs
385	AYN00_02595	AYM00_10045	AYM94_02585	AYM02_09660	AYM90_02610	AYM11_09370	AYO24_02935	AYO23_02940	AYM17_07225	AUR58_10535	AYM93_02580	AYO29_06595	AYM38_09535	CBU_0519	hypothetical protein	S	orthologs
406	AYN00_02715	AYM00_09915	AYM94_02710	AYM02_09535	AYM90_02730	AYM11_09250	AYO24_03055	AYO23_03060	AYM17_07105	AUR58_10405	AYM93_02700	AYO29_06460	AYM38_09415	CBU_0545	LemA family protein	S	orthologs
412	AYN00_02750	AYM00_09880	AYM94_02745	AYM02_09500	AYM90_02765	AYM11_09215	AYO24_03090	AYO23_03095	AYM17_07070	AUR58_10370	AYM93_02735	AYO29_06425	AYM38_09380	CBU_0552	ribosome silencing factor	S	orthologs
433	AYN00_02875	AYM00_09650	AYM94_02870	AYM02_09270	AYM90_02890	AYM11_08995	AYO24_03210	AYO23_03220	AYM17_06950	AUR58_10130	AYM93_02860	AYO29_06300	AYM38_09155	CBU_0580	hypothetical protein	S	orthologs
469	AYN00_03130	AYM00_06640	AYM94_03125	AYM02_06350	AYM90_03145	AYM11_06140	AYO24_03465	AYO23_03475	AYM17_06715	AUR58_07050	AYM93_03115	AYO29_07910	AYM38_06285	CBU_0632	ferritin	S	orthologs
485	AYN00_03245	AYM00_06755	AYM94_03240	AYM02_06465	AYM90_03260	AYM11_06255	AYO24_03580	AYO23_03590	AYM17_06605	AUR58_07165	AYM93_03230	AYO29_07810	AYM38_06400	CBU_0656	nucleoid-associated protein	S	orthologs
540	AYN00_03725	AYM00_08925	AYM94_03725	AYM02_08590	AYM90_03740	AYM11_08350	AYO24_05675	AYO23_05690	AYM17_06135	AUR58_09365	AYM93_03715	AYO29_01830	AYM38_08485	CBU_0747	lipopolysaccharide transport periplasmic protein LptA	S	orthologs
541	AYN00_03730	AYM00_08920	AYM94_03730	AYM02_08585	AYM90_03745	AYM11_08345	AYO24_05670	AYO23_05685	AYM17_06130	AUR58_09360	AYM93_03720	AYO29_01835	AYM38_08480	CBU_0748	LPS export ABC transporter periplasmic protein LptC	S	orthologs
548	AYN00_03770	AYM00_08870	AYM94_03770	AYM02_08540	AYM90_03785	AYM11_08305	AYO24_05630	AYO23_05645	AYM17_06090	AUR58_09310	AYM93_03760	AYO29_01880	AYM38_08440	CBU_0756	polyphenol oxidase	S	orthologs
559	AYN00_03870	AYM00_07345	AYM94_03870	AYM02_07045	AYM90_03885	AYM11_06825	AYO24_05530	AYO23_05545	AYM17_05990	AUR58_07780	AYM93_03860	AYO29_02015	AYM38_06945	CBU_0773	glyoxalase	S	orthologs
587	AYN00_04110	AYM00_07590	AYM94_04110	AYM02_07285	AYM90_04125	AYM11_07065	AYO24_05285	AYO23_05300	AYM17_05735	AUR58_08030	AYM93_04100	AYO29_02240	AYM38_07185	CBU_0822	cell filamentation protein Fic	S	orthologs
621	AYN00_04305	AYM00_07785	AYM94_04305	AYM02_07480	AYM90_04320	AYM11_07260	AYO24_05090	AYO23_05105	AYM17_05545	AUR58_08225	AYM93_04295	AYO29_02430	AYM38_07380	CBU_0859	hypothetical protein	S	orthologs
629	AYN00_04355	AYM00_07835	AYM94_04355	AYM02_07530	AYM90_04370	AYM11_07310	AYO24_05040	AYO23_05055	AYM17_05495	AUR58_08275	AYM93_04345	AYO29_02480	AYM38_07430	CBU_0870	hypothetical protein	S	orthologs
631	AYN00_04370	AYM00_07850	AYM94_04370	AYM02_07545	AYM90_04385	AYM11_07325	AYO24_05025	AYO23_05040	AYM17_05480	AUR58_08290	AYM93_04360	AYO29_02495	AYM38_07445	CBU_0873	DNA mismatch repair protein MutS	S	orthologs
646	AYN00_04480	AYM00_07945	AYM94_04480	AYM02_07640	AYM90_04495	AYM11_07420	AYO24_04915	AYO23_04930	AYM17_05370	AUR58_08385	AYM93_04470	AYO29_02585	AYM38_07540	CBU_0895	sporulation protein	S	orthologs
749	AYN00_05330	AYM00_08845	AYM94_05335	AYM02_08525	AYM90_05350	AYM11_08290	AYO24_04070	AYO23_04085	AYM17_04510	AUR58_09285	AYM93_05325	AYO29_03865	AYM38_08420	CBU_1061	segregation and condensation protein A	S	orthologs
753	AYN00_05385	AYM00_07205	AYM94_05390	AYM02_06900	AYM90_05405	AYM11_06685	AYO24_04015	AYO23_04030	AYM17_04460	AUR58_07630	AYM93_05380	AYO29_04685	AYM38_06805	CBU_1071	DoxX family protein	S	orthologs
758	AYN00_05420	AYM00_07170	AYM94_05445	AYM02_06865	AYM90_05440	AYM11_06650	AYO24_03985	AYO23_04000	AYM17_04430	AUR58_07590	AYM93_05440	AYO29_04780	AYM38_06775	CBU_1078	hypothetical protein	S	orthologs
759	AYN00_05425	AYM00_07165	AYM94_05450	AYM02_06860	AYM90_05445	AYM11_06645	AYO24_03980	AYO23_03995	AYM17_04425	AUR58_07585	AYM93_05445	AYO29_04785	AYM38_06770	CBU_1079	hypothetical protein	S	orthologs
784	AYN00_05875	AYM00_09175	AYM94_05895	AYM02_08830	AYM90_05895	AYM11_08575	AYO24_05950	AYO23_05965	AYM17_04250	AUR58_09630	AYM93_05890	AYO29_04975	AYM38_08715	CBU_1122	endopeptidase IV	S	orthologs
794	AYN00_05950	AYM00_09270	AYM94_05970	AYM02_08910	AYM90_05970	AYM11_08650	AYO24_06030	AYO23_06045	AYM17_04170	AUR58_09725	AYM93_05965	AYO29_05055	AYM38_08800	CBU_1137	enhanced entry protein	S	orthologs
795	AYN00_05955	AYM00_09275	AYM94_05975	AYM02_08915	AYM90_05975	AYM11_08655	AYO24_06035	AYO23_06050	AYM17_04165	AUR58_09730	AYM93_05970	AYO29_05060	AYM38_08805	CBU_1138	endopeptidase IV	S	orthologs
810	AYN00_06120	AYM00_09450	AYM94_06140	AYM02_09085	AYM90_06140	AYM11_08820	AYO24_06195	AYO23_06210	AYM17_04015	AUR58_09905	AYM93_06135	AYO29_05215	AYM38_08975	CBU_1170	DUF378 domain-containing protein	S	orthologs
811	AYN00_06125	AYM00_09455	AYM94_06145	AYM02_09090	AYM90_06145	AYM11_08825	AYO24_06200	AYO23_06215	AYM17_04010	AUR58_09910	AYM93_06140	AYO29_05220	AYM38_08980	CBU_1171	secondary thiamine-phosphate synthase	S	orthologs
842	AYN00_05505	AYM00_06360	AYM94_05525	AYM02_06100	AYM90_05600	AYM11_05895	AYO24_06435	AYO23_06445	AYM17_03760	AUR58_06765	AYM93_05520	AYO29_05460	AYM38_06025	CBU_1224	recombinase RmuC	S	orthologs
856	AYN00_05580	AYM00_06275	AYM94_05600	AYM02_06020	AYM90_05675	AYM11_05820	AYO24_06510	AYO23_06520	AYM17_03685	AUR58_06680	AYM93_05595	AYO29_05540	AYM38_05950	CBU_1239	acyl-phosphate glycerol 3-phosphate acyltransferase	S	orthologs
861	AYN00_05615	AYM00_06235	AYM94_05635	AYM02_05985	AYM90_05710	AYM11_05785	AYO24_06545	AYO23_06555	AYM17_03650	AUR58_06635	AYM93_05630	AYO29_05575	AYM38_05910	CBU_1247	hypothetical protein	S	orthologs
873	AYN00_05690	AYM00_06150	AYM94_05710	AYM02_05900	AYM90_05785	AYM11_05705	AYO24_06620	AYO23_06635	AYM17_03570	AUR58_06550	AYM93_05705	AYO29_05650	AYM38_05830	CBU_1262	hypothetical protein	S	orthologs
876	AYN00_05715	AYM00_06115	AYM94_05735	AYM02_05870	AYM90_05810	AYM11_05680	AYO24_06645	AYO23_06660	AYM17_03545	AUR58_06515	AYM93_05730	AYO29_05675	AYM38_05800	CBU_1267	hypothetical protein	S	orthologs
906	AYN00_06830	AYM00_05915	AYM94_06850	AYM02_05685	AYM90_06850	AYM11_05500	AYO24_06825	AYO23_06840	AYM17_03360	AUR58_06315	AYM93_06845	AYO29_05870	AYM38_05615	CBU_1303	RnfH family protein	S	orthologs
940	AYN00_07100	AYM00_05625	AYM94_07120	AYM02_05395	AYM90_07120	AYM11_05215	AYO24_07095	AYO23_07110	AYM17_03100	AUR58_06030	AYM93_07115	AYO29_06135	AYM38_05330	CBU_1355	FeS assembly scaffold SufA	S	orthologs
955	AYN00_07215	AYM00_10475	AYM94_07235	AYM02_10110	AYM90_07235	AYM11_09795	AYO24_07210	AYO23_07225	AYM17_02985	AUR58_10990	AYM93_07230	AYO29_07190	AYM38_09970	CBU_1380	quinol oxidase	S	orthologs
964	AYN00_07295	AYM00_10560	AYM94_07315	AYM02_10195	AYM90_07315	AYM11_09880	AYO24_07290	AYO23_07305	AYM17_02925	AUR58_11075	AYM93_07310	AYO29_07270	AYM38_10055	CBU_1394	endopeptidase IV	S	orthologs
988	AYN00_07445	AYM00_05040	AYM94_07465	AYM02_04815	AYM90_07465	AYM11_04640	AYO24_07445	AYO23_07455	AYM17_02750	AUR58_11250	AYM93_07460	AYO29_03860	AYM38_04745	CBU_1429	hypothetical protein	S	orthologs
993	AYN00_07475	AYM00_05010	AYM94_07495	AYM02_04780	AYM90_07495	AYM11_04610	AYO24_07480	AYO23_07490	AYM17_02725	AUR58_05360	AYM93_07490	AYO29_03835	AYM38_04720	CBU_1434	ribosome maturation factor RimP	S	orthologs
1016	AYN00_07650	AYM00_04825	AYM94_07670	AYM02_04605	AYM90_07670	AYM11_04435	AYO24_07660	AYO23_07670	AYM17_02550	AUR58_05175	AYM93_07665	AYO29_08340	AYM38_04550	CBU_1465	EVE domain-containing protein	S	orthologs
1019	AYN00_07665	AYM00_04810	AYM94_07685	AYM02_04590	AYM90_07685	AYM11_04420	AYO24_07675	AYO23_07685	AYM17_02535	AUR58_05160	AYM93_07680	AYO29_08355	AYM38_04535	CBU_1468	hypothetical protein	S	orthologs
1029	AYN00_07715	AYM00_04745	AYM94_07735	AYM02_04535	AYM90_07735	AYM11_04370	AYO24_07725	AYO23_07735	AYM17_02485	AUR58_05085	AYM93_07730	AYO29_08195	AYM38_04475	CBU_1478	alkyl hydroperoxide reductase	S	orthologs
1036	AYN00_07770	AYM00_04675	AYM94_07790	AYM02_04480	AYM90_07790	AYM11_04315	AYO24_07780	AYO23_07790	AYM17_02430	AUR58_05015	AYM93_07785	AYO29_08250	AYM38_04425	CBU_1489	UDP-2,3-diacylglucosamine hydrolase	S	orthologs
1079	AYN00_08080	AYM00_04280	AYM94_08100	AYM02_04130	AYM90_08100	AYM11_03985	AYO24_08100	AYO23_08105	AYM17_02120	AUR58_04610	AYM93_08095	AYO29_08705	AYM38_04085	CBU_1558	FmdB family transcriptional regulator	S	orthologs
1080	AYN00_08085	AYM00_04275	AYM94_08105	AYM02_04125	AYM90_08105	AYM11_03980	AYO24_08105	AYO23_08110	AYM17_02115	AUR58_04605	AYM93_08100	AYO29_08710	AYM38_04080	CBU_1559	hypothetical protein	S	orthologs
1085	AYN00_08120	AYM00_04240	AYM94_08140	AYM02_04090	AYM90_08140	AYM11_03945	AYO24_08140	AYO23_08145	AYM17_02080	AUR58_04570	AYM93_08135	AYO29_08745	AYM38_04045	CBU_1566	hypothetical protein	S	orthologs
1091	AYN00_08170	AYM00_04180	AYM94_08195	AYM02_04035	AYM90_08190	AYM11_03895	AYO24_08190	AYO23_08195	AYM17_02030	AUR58_04500	AYM93_08190	AYO29_08805	AYM38_03995	CBU_1578	hypothetical protein	S	orthologs
1103	AYN00_08245	AYM00_04100	AYM94_08270	AYM02_03960	AYM90_08265	AYM11_03820	AYO24_08265	AYO23_08270	AYM17_01965	AUR58_04415	AYM93_08265	AYO29_08885	AYM38_03920	CBU_1594	glutamyl-tRNA amidotransferase	S	orthologs
1118	AYN00_08405	AYM00_03925	AYM94_08430	AYM02_03795	AYM90_08425	AYM11_03660	AYO24_08425	AYO23_08430	AYM17_01855	AUR58_04235	AYM93_08425	AYO29_09025	AYM38_03750	CBU_1627	type IV secretion protein IcmE	S	orthologs
1139	AYN00_08525	AYM00_03835	AYM94_08555	AYM02_03710	AYM90_08545	AYM11_03580	AYO24_08535	AYO23_08535	AYM17_01730	AUR58_04140	AYM93_08550	AYO29_09300	AYM38_03675	CBU_1652	phosphoesterase	S	orthologs
1145	AYN00_06365	AYM00_03745	AYM94_06240	AYM02_03630	AYM90_06385	AYM11_03500	AYO24_08580	AYO23_08580	AYM17_01700	AUR58_04040	AYM93_06235	AYO29_01705	AYM38_03595	CBU_1660	hypothetical protein	S	orthologs
1147	AYN00_06375	AYM00_03735	AYM94_06250	AYM02_03620	AYM90_06395	AYM11_03490	AYO24_08590	AYO23_08590	AYM17_01690	AUR58_04030	AYM93_06245	AYO29_01695	AYM38_03585	CBU_1662	hypothetical protein	S	orthologs
1196	AYN00_08635	AYM00_03315	AYM94_08670	AYM02_03220	AYM90_08655	AYM11_03105	AYO24_08965	AYO23_08965	AYM17_00540	AUR58_03605	AYM93_08665	AYO29_01315	AYM38_03180	CBU_1735	hypothetical protein	S	orthologs
1250	AYN00_09090	AYM00_02820	AYM94_09120	AYM02_02750	AYM90_09105	AYM11_02660	AYO24_09415	AYO23_09415	AYM17_00930	AUR58_03095	AYM93_09115	AYO29_00485	AYM38_02720	CBU_1828	hypothetical protein	S	orthologs
1291	AYN00_09355	AYM00_02530	AYM94_09380	AYM02_02470	AYM90_09370	AYM11_02385	AYO24_09680	AYO23_09670	AYM17_01200	AUR58_02810	AYM93_09375	AYO29_00750	AYM38_02440	CBU_1878	iron-sulfur cluster insertion protein ErpA	S	orthologs
1293	AYN00_09365	AYM00_02520	AYM94_09390	AYM02_02460	AYM90_09380	AYM11_02375	AYO24_09690	AYO23_09680	AYM17_01210	AUR58_02800	AYM93_09385	AYO29_00760	AYM38_02430	CBU_1880	hypothetical protein	S	orthologs
1297	AYN00_09385	AYM00_02500	AYM94_09410	AYM02_02440	AYM90_09400	AYM11_02355	AYO24_09710	AYO23_09700	AYM17_01230	AUR58_02780	AYM93_09405	AYO29_00780	AYM38_02410	CBU_1884	hypothetical protein	S	orthologs
1333	AYN00_10160	AYM00_02275	AYM94_09690	AYM02_02220	AYM90_09680	AYM11_02140	AYO24_09925	AYO23_09915	AYM17_00175	AUR58_02545	AYM93_10175	AYO29_00175	AYM38_02190	CBU_1933	DNA repair protein	S	orthologs
1349	AYN00_10265	AYM00_02170	AYM94_09795	AYM02_02115	AYM90_09785	AYM11_02035	AYO24_10030	AYO23_10020	AYM17_01495	AUR58_02440	AYM93_10280	AYO29_00290	AYM38_02085	CBU_1954	phosphosulfolactate synthase	S	orthologs
1352	AYN00_10290	AYM00_02145	AYM94_09820	AYM02_02090	AYM90_09810	AYM11_02010	AYO24_10055	AYO23_10045	AYM17_01470	AUR58_02415	AYM93_10305	AYO29_00315	AYM38_02060	CBU_1960	16S rRNA methyltransferase	S	orthologs
1376	AYN00_09470	AYM00_01370	AYM94_09485	AYM02_01350	AYM90_09475	AYM11_01310	AYO24_00425	AYO23_00430	AYM17_09840	AUR58_01635	AYM93_09480	AYO29_09945	AYM38_01325	CBU_1994	hypothetical protein	S	orthologs
1381	AYN00_09495	AYM00_01400	AYM94_09510	AYM02_01385	AYM90_09500	AYM11_01335	AYO24_00400	AYO23_00405	AYM17_09865	AUR58_01670	AYM93_09505	AYO29_09970	AYM38_01355	CBU_1999	hypothetical protein	S	orthologs
1391	AYN00_09550	AYM00_01455	AYM94_09980	AYM02_01440	AYM90_09970	AYM11_01390	AYO24_00345	AYO23_00350	AYM17_09920	AUR58_01725	AYM93_09560	AYO29_10025	AYM38_01410	CBU_2009	hypothetical protein	S	orthologs
1399	AYN00_09595	AYM00_01505	AYM94_10030	AYM02_01485	AYM90_10015	AYM11_01435	AYO24_00300	AYO23_00300	AYM17_09965	AUR58_01770	AYM93_09610	AYO29_10070	AYM38_01455	CBU_2018	hypothetical protein	S	orthologs
1402	AYN00_09620	AYM00_01530	AYM94_10055	AYM02_01510	AYM90_10040	AYM11_01460	AYO24_00275	AYO23_00275	AYM17_09990	AUR58_01795	AYM93_09635	AYO29_10095	AYM38_01480	CBU_2023	hypothetical protein	S	orthologs
1429	AYN00_09880	AYM00_01805	AYM94_10315	AYM02_01775	AYM90_10300	AYM11_01720	AYO24_00020	AYO23_00020	AYM17_10225	AUR58_02075	AYM93_09895	AYO29_10335	AYM38_01750	CBU_2076	NGG1p interacting factor NIF3	S	orthologs
1431	AYN00_09890	AYM00_01820	AYM94_10325	AYM02_01785	AYM90_10310	AYM11_01730	AYO24_10275	AYO23_10265	AYM17_10235	AUR58_02095	AYM93_09905	AYO29_10345	AYM38_01760	CBU_2078	cell filamentation protein Fic	S	orthologs
1435	AYN00_09910	AYM00_01840	AYM94_10345	AYM02_01805	AYM90_10330	AYM11_01750	AYO24_10255	AYO23_10245	AYM17_10255	AUR58_02115	AYM93_09925	AYO29_10365	AYM38_01780	CBU_2082	hypothetical protein	S	orthologs
54	AYN00_00105	AYM00_02045	AYM94_00110	AYM02_02000	AYM90_00115	AYM11_01925	AYO24_10145	AYO23_10135	AYM17_01385	AUR58_02320	AYM93_00100	AYO29_00925	AYM38_01965	CBU_0024	carbon storage regulator	T	orthologs
110	AYN00_00500	AYM00_00920	AYM94_00495	AYM02_00900	AYM90_00505	AYM11_00880	AYO24_00855	AYO23_00860	AYM17_09410	AUR58_01190	AYM93_00490	AYO29_09645	AYM38_00885	CBU_0099	phosphohistidine phosphatase	T	orthologs
280	AYN00_01755	AYM00_05085	AYM94_01750	AYM02_04855	AYM90_01765	AYM11_04680	AYO24_02105	AYO23_02110	AYM17_08100	AUR58_05445	AYM93_01745	AYO29_03050	AYM38_04790	CBU_0351	histidine kinase	T	orthologs
286	AYN00_01815	AYM00_05145	AYM94_01810	AYM02_04915	AYM90_01825	AYM11_04740	AYO24_02165	AYO23_02175	AYM17_08045	AUR58_05505	AYM93_01805	AYO29_03100	AYM38_04850	CBU_0366	ATPase	T	orthologs
423	AYN00_02820	AYM00_09810	AYM94_02815	AYM02_09425	AYM90_02835	AYM11_09145	AYO24_03155	AYO23_03165	AYM17_07005	AUR58_10290	AYM93_02805	AYO29_06355	AYM38_09305	CBU_0568	phosphate starvation-inducible protein PhoH	T	orthologs
470	AYN00_03135	AYM00_06645	AYM94_03130	AYM02_06355	AYM90_03150	AYM11_06145	AYO24_03470	AYO23_03480	AYM17_06710	AUR58_07055	AYM93_03120	AYO29_07905	AYM38_06290	CBU_0634	hybrid sensor histidine kinase/response regulator	T	orthologs
569	AYN00_03945	AYM00_07420	AYM94_03945	AYM02_07120	AYM90_03960	AYM11_06900	AYO24_05455	AYO23_05470	AYM17_05910	AUR58_07855	AYM93_03935	AYO29_02090	AYM38_07020	CBU_0789	hybrid sensor histidine kinase/response regulator	T	orthologs
636	AYN00_04425	AYM00_07890	AYM94_04425	AYM02_07585	AYM90_04440	AYM11_07365	AYO24_04970	AYO23_04985	AYM17_05425	AUR58_08330	AYM93_04415	AYO29_02530	AYM38_07485	CBU_0884	GTP-binding protein TypA	T	orthologs
739	AYN00_05275	AYM00_08790	AYM94_05280	AYM02_08470	AYM90_05295	AYM11_08235	AYO24_04125	AYO23_04140	AYM17_04565	AUR58_09230	AYM93_05270	AYO29_03920	AYM38_08365	CBU_1050	carbon storage regulator	T	orthologs
847	AYN00_05530	AYM00_06335	AYM94_05550	AYM02_06075	AYM90_05625	AYM11_05870	AYO24_06460	AYO23_06470	AYM17_03735	AUR58_06740	AYM93_05545	AYO29_05485	AYM38_06000	CBU_1228	histidine kinase	T	orthologs
1071	AYN00_08045	AYM00_04330	AYM94_08065	AYM02_04170	AYM90_08065	AYM11_04025	AYO24_08065	AYO23_08070	AYM17_02160	AUR58_04665	AYM93_08060	AYO29_08655	AYM38_04125	CBU_1550	phosphoenolpyruvate--protein phosphotransferase	T	orthologs
1317	AYN00_10080	AYM00_02365	AYM94_09610	AYM02_02305	AYM90_09600	AYM11_02220	AYO24_09845	AYO23_09835	AYM17_00090	AUR58_02640	AYM93_10095	AYO29_00090	AYM38_02275	CBU_1916	universal stress protein UspA	T	orthologs
1357	AYN00_10325	AYM00_01260	AYM94_09855	AYM02_01240	AYM90_09845	AYM11_01200	AYO24_00525	AYO23_00530	AYM17_09730	AUR58_01525	AYM93_10340	AYO29_09830	AYM38_01215	CBU_1969	RNA polymerase-binding protein DksA	T	orthologs
1370	AYN00_10390	AYM00_01325	AYM94_09920	AYM02_01305	AYM90_09910	AYM11_01265	AYO24_00460	AYO23_00465	AYM17_09795	AUR58_01590	AYM93_10405	AYO29_09895	AYM38_01280	CBU_1983	universal stress protein UspA	T	orthologs
1388	AYN00_09530	AYM00_01435	AYM94_09960	AYM02_01420	AYM90_09950	AYM11_01370	AYO24_00365	AYO23_00370	AYM17_09900	AUR58_01705	AYM93_09540	AYO29_10005	AYM38_01390	CBU_2005	histidine kinase	T	orthologs
250	AYN00_01520	AYM00_10940	AYM94_01515	AYM02_10570	AYM90_01530	AYM11_10230	AYO24_01875	AYO23_01880	AYM17_08360	AUR58_11470	AYM93_01510	AYO29_03550	AYM38_10410	CBU_0303	(p)ppGpp synthetase	TK	orthologs
287	AYN00_01820	AYM00_05150	AYM94_01815	AYM02_04920	AYM90_01830	AYM11_04745	AYO24_02170	AYO23_02180	AYM17_08040	AUR58_05510	AYM93_01810	AYO29_03105	AYM38_04855	CBU_0367	two-component system response regulator	TK	orthologs
515	AYN00_03545	AYM00_07060	AYM94_03545	AYM02_06765	AYM90_03560	AYM11_06550	AYO24_03880	AYO23_03895	AYM17_06305	AUR58_07470	AYM93_03535	AYO29_07505	AYM38_06670	CBU_0712	two-component system response regulator	TK	orthologs
682	AYN00_04795	AYM00_08270	AYM94_04795	AYM02_07960	AYM90_04815	AYM11_07735	AYO24_04600	AYO23_04615	AYM17_05080	AUR58_08710	AYM93_04785	AYO29_04400	AYM38_07860	CBU_0955	two-component system response regulator	TK	orthologs
846	AYN00_05525	AYM00_06340	AYM94_05545	AYM02_06080	AYM90_05620	AYM11_05875	AYO24_06455	AYO23_06465	AYM17_03740	AUR58_06745	AYM93_05540	AYO29_05480	AYM38_06005	CBU_1227	two-component system response regulator	TK	orthologs
954	AYN00_07190	AYM00_10450	AYM94_07210	AYM02_10085	AYM90_07210	AYM11_09770	AYO24_07185	AYO23_07200	AYM17_03010	AUR58_10965	AYM93_07205	AYO29_04755	AYM38_09945	CBU_1375	(p)ppGpp synthetase	TK	orthologs
98	AYN00_00430	AYM00_00990	AYM94_00425	AYM02_00970	AYM90_00435	AYM11_00950	AYO24_00785	AYO23_00790	AYM17_09480	AUR58_01260	AYM93_00420	AYO29_09715	AYM38_00955	CBU_0090	translocation protein TolB	U	orthologs
142	AYN00_00730	AYM00_00685	AYM94_00725	AYM02_00665	AYM90_00735	AYM11_00650	AYO24_01085	AYO23_01090	AYM17_09180	AUR58_00955	AYM93_00720	AYO29_09420	AYM38_00650	CBU_0147	preprotein translocase subunit SecA	U	orthologs
180	AYN00_01125	AYM00_00275	AYM94_01120	AYM02_00265	AYM90_01130	AYM11_00250	AYO24_01480	AYO23_01485	AYM17_08755	AUR58_00530	AYM93_01115	AYO29_02970	AYM38_00255	CBU_0224	preprotein translocase subunit SecE	U	orthologs
214	AYN00_01290	AYM00_00100	AYM94_01285	AYM02_00095	AYM90_01300	AYM11_00080	AYO24_01645	AYO23_01650	AYM17_08585	AUR58_00350	AYM93_01280	AYO29_03320	AYM38_00085	CBU_0258	preprotein translocase subunit SecY	U	orthologs
230	AYN00_01390	AYM00_11070	AYM94_01385	AYM02_10700	AYM90_01400	AYM11_10360	AYO24_01745	AYO23_01750	AYM17_08490	AUR58_11600	AYM93_01380	AYO29_03415	AYM38_10540	CBU_0278	hypothetical protein	U	orthologs
328	AYN00_02230	AYM00_10415	AYM94_02220	AYM02_10040	AYM90_02245	AYM11_09735	AYO24_02565	AYO23_02570	AYM17_07645	AUR58_10920	AYM93_02215	AYO29_06995	AYM38_09905	CBU_0450	signal recognition particle	U	orthologs
798	AYN00_05980	AYM00_09300	AYM94_06000	AYM02_08940	AYM90_06000	AYM11_08680	AYO24_06060	AYO23_06075	AYM17_04140	AUR58_09755	AYM93_05995	AYO29_05080	AYM38_08830	CBU_1141	preprotein translocase subunit SecF	U	orthologs
799	AYN00_05985	AYM00_09305	AYM94_06005	AYM02_08945	AYM90_06005	AYM11_08685	AYO24_06065	AYO23_06080	AYM17_04135	AUR58_09760	AYM93_06000	AYO29_05085	AYM38_08835	CBU_1142	preprotein translocase subunit SecD	U	orthologs
800	AYN00_05990	AYM00_09310	AYM94_06010	AYM02_08950	AYM90_06010	AYM11_08690	AYO24_06070	AYO23_06085	AYM17_04130	AUR58_09765	AYM93_06005	AYO29_05090	AYM38_08840	CBU_1143	preprotein translocase subunit YajC	U	orthologs
1008	AYN00_07560	AYM00_04925	AYM94_07580	AYM02_04695	AYM90_07580	AYM11_04525	AYO24_07565	AYO23_07575	AYM17_02640	AUR58_05275	AYM93_07575	AYO29_03750	AYM38_04640	CBU_1449	preprotein translocase subunit SecG	U	orthologs
1044	AYN00_07835	AYM00_04580	AYM94_07855	AYM02_04400	AYM90_07855	AYM11_04245	AYO24_07850	AYO23_07860	AYM17_02370	AUR58_04915	AYM93_07850	AYO29_08450	AYM38_04345	CBU_1504	S26 family signal peptidase	U	orthologs
1056	AYN00_07915	AYM00_04490	AYM94_07935	AYM02_04315	AYM90_07935	AYM11_04165	AYO24_07930	AYO23_07940	AYM17_02295	AUR58_04825	AYM93_07930	AYO29_08525	AYM38_04265	CBU_1519	preprotein translocase subunit SecB	U	orthologs
1089	AYN00_08150	AYM00_04205	AYM94_08175	AYM02_04055	AYM90_08170	AYM11_03915	AYO24_08170	AYO23_08175	AYM17_02050	AUR58_04530	AYM93_08170	AYO29_08780	AYM38_04015	CBU_1574	protein TolQ	U	orthologs
1090	AYN00_08155	AYM00_04200	AYM94_08180	AYM02_04050	AYM90_08175	AYM11_03910	AYO24_08175	AYO23_08180	AYM17_02045	AUR58_04525	AYM93_08175	AYO29_08785	AYM38_04010	CBU_1575	protein TolR	U	orthologs
1307	AYN00_10020	AYM00_02425	AYM94_09550	AYM02_02365	AYM90_09540	AYM11_02280	AYO24_09785	AYO23_09775	AYM17_00030	AUR58_02700	AYM93_10035	AYO29_00025	AYM38_02335	CBU_1903	cell division protein FtsY	U	orthologs
1320	AYN00_10095	AYM00_02350	AYM94_09625	AYM02_02290	AYM90_09615	AYM11_02205	AYO24_09860	AYO23_09850	AYM17_00105	AUR58_02625	AYM93_10110	AYO29_00105	AYM38_02260	CBU_1920	hypothetical protein	U	orthologs
291	AYN00_01875	AYM00_05205	AYM94_01870	AYM02_04975	AYM90_01890	AYM11_04805	AYO24_02225	AYO23_02235	AYM17_07990	AUR58_05565	AYM93_01865	AYO29_03175	AYM38_04910	CBU_0379	nucleoside transporter	V	orthologs
545	AYN00_03755	AYM00_08885	AYM94_03755	AYM02_08555	AYM90_03770	AYM11_08320	AYO24_05645	AYO23_05660	AYM17_06105	AUR58_09325	AYM93_03745	AYO29_01865	AYM38_08455	CBU_0753	multidrug transporter AcrB	V	orthologs
562	AYN00_03885	AYM00_07360	AYM94_03885	AYM02_07060	AYM90_03900	AYM11_06840	AYO24_05515	AYO23_05530	AYM17_05975	AUR58_07795	AYM93_03875	AYO29_02030	AYM38_06960	CBU_0776	multidrug ABC transporter ATP-binding protein	V	orthologs
573	AYN00_03995	AYM00_07470	AYM94_03995	AYM02_07170	AYM90_04010	AYM11_06950	AYO24_05405	AYO23_05420	AYM17_05850	AUR58_07905	AYM93_03985	AYO29_02135	AYM38_07070	CBU_0798	multidrug transporter	V	orthologs
580	AYN00_04040	AYM00_07515	AYM94_04040	AYM02_07215	AYM90_04055	AYM11_06995	AYO24_05360	AYO23_05375	AYM17_05805	AUR58_07950	AYM93_04030	AYO29_02180	AYM38_07115	CBU_0807	serine hydrolase	V	orthologs
598	AYN00_04170	AYM00_07650	AYM94_04170	AYM02_07345	AYM90_04185	AYM11_07125	AYO24_05225	AYO23_05240	AYM17_05680	AUR58_08090	AYM93_04160	AYO29_02295	AYM38_07245	CBU_0833	ABC transporter permease	V	orthologs
618	AYN00_04290	AYM00_07770	AYM94_04290	AYM02_07465	AYM90_04305	AYM11_07245	AYO24_05105	AYO23_05120	AYM17_05560	AUR58_08210	AYM93_04280	AYO29_02415	AYM38_07365	CBU_0856	lipid ABC transporter permease/ATP-binding protein	V	orthologs
671	AYN00_04680	AYM00_08150	AYM94_04680	AYM02_07840	AYM90_04700	AYM11_07615	AYO24_04715	AYO23_04730	AYM17_05180	AUR58_08590	AYM93_04670	AYO29_04500	AYM38_07740	CBU_0934	ABC transporter	V	orthologs
717	AYN00_05030	AYM00_08520	AYM94_05030	AYM02_08205	AYM90_05050	AYM11_07970	AYO24_04365	AYO23_04380	AYM17_04835	AUR58_08960	AYM93_05020	AYO29_04160	AYM38_08105	CBU_1000	lipoprotein ABC transporter ATP-binding protein	V	orthologs
770	AYN00_05745	AYM00_09075	AYM94_05765	AYM02_08735	AYM90_05505	AYM11_08485	AYO24_05815	AYO23_05830	AYM17_04360	AUR58_09520	AYM93_05760	AYO29_04835	AYM38_08625	CBU_1093	acriflavine resistance protein B	V	orthologs
1235	AYN00_08990	AYM00_02930	AYM94_09020	AYM02_02850	AYM90_09005	AYM11_02760	AYO24_09315	AYO23_09315	AYM17_00830	AUR58_03205	AYM93_09015	AYO29_00385	AYM38_02820	CBU_1808	ABC transporter substrate-binding protein	V	orthologs
1236	AYN00_08995	AYM00_02925	AYM94_09025	AYM02_02845	AYM90_09010	AYM11_02755	AYO24_09320	AYO23_09320	AYM17_00835	AUR58_03200	AYM93_09020	AYO29_00390	AYM38_02815	CBU_1809	macrolide ABC transporter ATP-binding protein	V	orthologs
